# Supplementary material
Source: PubMed Central journal article supplement (PMC4091824)
Supplement: NIHMS583353-supplement-Supplemental_Figure_1.pdf [file NIHMS583353-supplement-Supplemental_Figure_1.pdf]

**A**

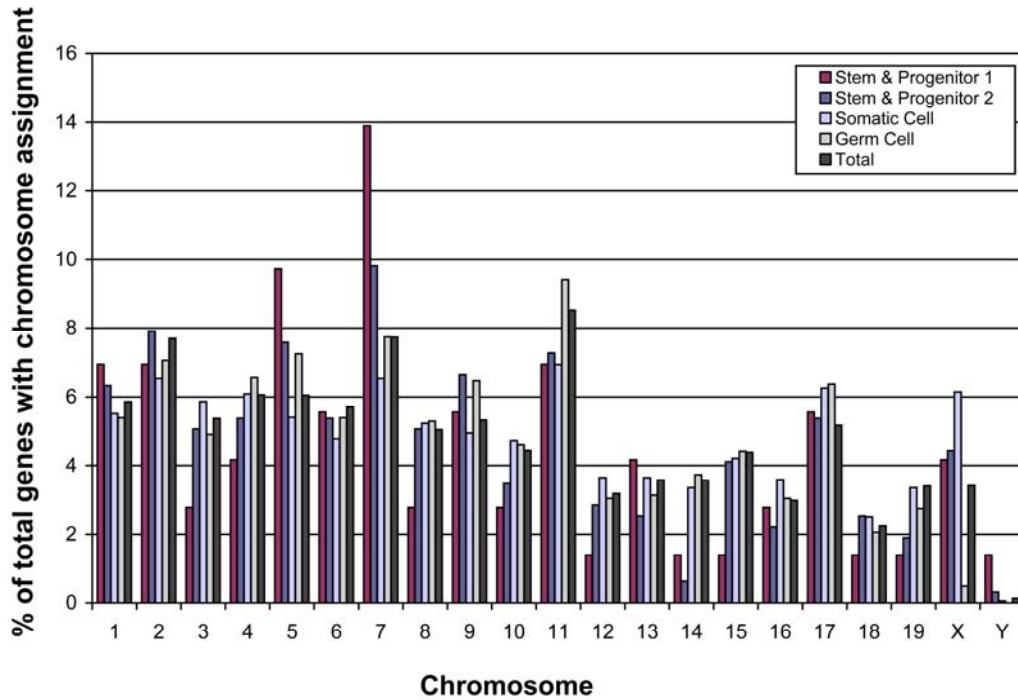

**B**

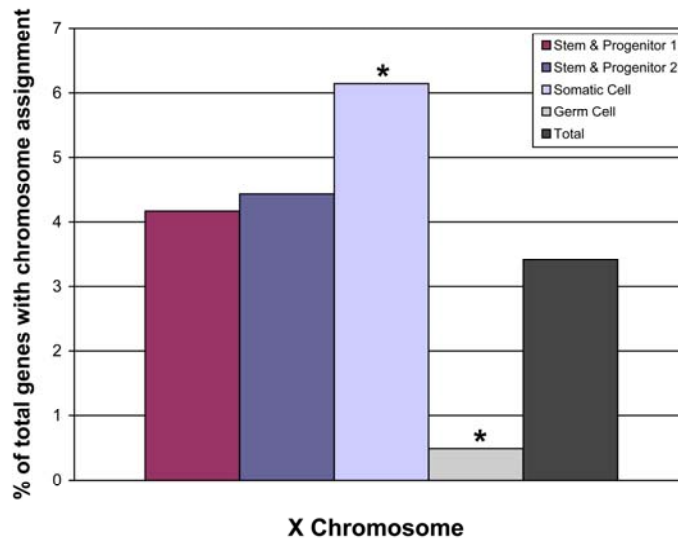

**Supplemental Figure 1: Chromosomal distribution of candidate genes.** The chromosomal distribution of Stem/progenitor cluster 1 (maroon bars), stem/progenitor cluster 2 (dark blue bars), somatic cell (light blue bars), and germ cell (grey bars) candidate genes is compared the distribution of genes on the MGU74Av2 array (black bars). **(A)** This chromosomal distribution of stem/progenitor cluster 1 genes was not different than the MGU74Av2 array. **(B)** The percent of X-linked genes in the somatic cell cluster and germ cell cluster were significantly different than the MGU74Av2 array (black bars). Significant differences are indicated with asterisks in **B**.
