# Supplementary material
Source: PubMed Central journal article supplement (PMC4091824)
Supplement: NIHMS583353-supplement-Supplemental_Table_1.pdf [file NIHMS583353-supplement-Supplemental_Table_1.pdf]

**Supplemental Table 1. Germ Cell Cluster (WT > Cr, Bu; 1,311 probesets)**

| Probeset    | Accession # | Gene             | Description                                                                                                                                     |
|-------------|-------------|------------------|-------------------------------------------------------------------------------------------------------------------------------------------------|
| 102946_r_at | U09964      | ---              | ---                                                                                                                                             |
| 160467_at   | AB016275    | Oaz3             | ornithine decarboxylase antizyme 3                                                                                                              |
| 93242_at    | Z47352      | Prm3             | protamine 3                                                                                                                                     |
| 160506_at   | AA673494    | Ropn1l           | ropporin 1-like                                                                                                                                 |
| 160950_at   | AA497662    | Gapdhs           | glyceraldehyde-3-phosphate dehydrogenase, spermatogenic                                                                                         |
| 160404_at   | AA110326    | Hils1            | histone H1-like protein in spermatids 1                                                                                                         |
| 103632_at   | AI036958    | Hmgb4            | high-mobility group box 4                                                                                                                       |
| 96735_at    | AW049732    | Stard10          | START domain containing 10                                                                                                                      |
| 93207_at    | D00754      | Acr              | preproacrosin                                                                                                                                   |
| 100402_f_at | U17108      | Zp3r             | zona pellucida 3 receptor                                                                                                                       |
| 101534_at   | M60254      | Tnp2             | transition protein 2                                                                                                                            |
| 102857_at   | U10341      | Akap4            | A kinase (PRKA) anchor protein 4                                                                                                                |
| 101864_at   | AI173190    | Actl7b           | actin-like 7b                                                                                                                                   |
| 102244_at   | AB008910    | Tesp1            | testicular serine protease 1                                                                                                                    |
| 92455_at    | Y09878      | Ddc8             | testis specific protein, Ddc8                                                                                                                   |
| 96620_at    | D87325      | Gsg1             | germ cell-specific gene 1                                                                                                                       |
| 93834_at    | M25487      | Hist1h2bp        | histone 1, H2bp                                                                                                                                 |
| 160219_r_at | X64455      | Meig1            | meiosis expressed gene 1                                                                                                                        |
| 100891_at   | M88463      | Smcp             | sperm mitochondria-associated cysteine-rich protein                                                                                             |
| 103645_at   | AI326313    | Dnajb8           | DnaJ (Hsp40) homolog, subfamily B, member 8                                                                                                     |
| 97096_at    | J02935      | Prkar2a          | protein kinase, cAMP dependent regulatory, type II alpha                                                                                        |
| 103088_at   | X94310      | Chl1             | cell adhesion molecule with homology to L1CAM                                                                                                   |
| 102832_at   | U22056      | Mapkapk5 /// Ada | MAP kinase-activated protein kinase 5 /// a disintegrin and metallopeptidase domain 1a                                                          |
| 162056_f_at | AV269062    | ---              | ---                                                                                                                                             |
| 103613_at   | AA144642    | Aldoa-ps1        | aldolase 1, A isoform, pseudogene 1                                                                                                             |
| 103684_at   | AB027138    | Tekt2            | tektin 2                                                                                                                                        |
| 92490_at    | AJ132889    | Kif9             | kinesin family member 9                                                                                                                         |
| 102746_at   | AF068865    | BC089491         | cDNA sequence BC089491                                                                                                                          |
| 101388_at   | M17299      | Pgk2             | phosphoglycerate kinase 2                                                                                                                       |
| 102301_at   | AB026984    | Capza3           | capping protein (actin filament) muscle Z-line, alpha 3                                                                                         |
| 95060_at    | AF058054    | Slc16a7          | solute carrier family 16 (monocarboxylic acid transporters), member 7                                                                           |
| 160258_at   | AI853190    | Magmas           | mitochondria-associated protein involved in granulocyte-macrophage colony-stimulating factor signal transduction                                |
| 100562_at   | AI846319    | 2400006H24Rik    | RIKEN cDNA 2400006H24 gene                                                                                                                      |
| 160997_at   | AI606951    | E130303B06Rik    | RIKEN cDNA E130303B06 gene                                                                                                                      |
| 104440_at   | AF073954    | Ybx2             | Y box protein 2                                                                                                                                 |
| 101968_at   | X79446      | Odf1             | outer dense fiber of sperm tails 1                                                                                                              |
| 94624_at    | AF025310    | Stk22s1          | serine/threonine kinase 22 substrate 1                                                                                                          |
| 94370_at    | AA615075    | Oit1             | oncoprotein induced transcript 1                                                                                                                |
| 98310_at    | AB016984    | Znrf4            | zinc and ring finger 4                                                                                                                          |
| 160943_at   | AJ005678    | Stag3            | stromal antigen 3                                                                                                                               |
| 102846_at   | AF019926    | Tssk2            | testis-specific serine kinase 2                                                                                                                 |
| 92897_at    | U31992      | Acrv1            | acrosomal vesicle protein 1                                                                                                                     |
| 100626_at   | AF034105    | Odf2             | outer dense fiber of sperm tails 2                                                                                                              |
| 161989_f_at | AV238359    | Crat             | carnitine acetyltransferase                                                                                                                     |
| 102206_at   | AF030001    | Fkbpl            | FK506 binding protein-like                                                                                                                      |
| 103360_at   | U01840      | Tssk1            | testis-specific serine kinase 1                                                                                                                 |
| 160618_at   | AA760613    | Lgals8           | lectin, galactose binding, soluble 8                                                                                                            |
| 92198_s_at  | L41365      | Daf2             | decay accelerating factor 2                                                                                                                     |
| 98326_f_at  | AV254726    | Ccdc96           | coiled-coil domain containing 96                                                                                                                |
| 97369_g_at  | U95145      | Akap1            | A kinase (PRKA) anchor protein 1                                                                                                                |
| 92180_at    | AI851599    | H1fx             | H1 histone family, member X                                                                                                                     |
| 161722_f_at | AV263874    | Gstm5            | glutathione S-transferase, mu 5                                                                                                                 |
| 102396_at   | AW122840    | Ift172           | intraflagellar transport 172 homolog (Chlamydomonas)                                                                                            |
| 99589_f_at  | X07625      | Prm1             | protamine 1                                                                                                                                     |
| 102818_at   | X72697      | Xmr /// LOC5462  | Xlr-related, meiosis regulated /// Xmr protein /// similar to Xlr-related, meiosis regulated /// similar to XMR /// similar to Xlr-related, mei |
| 99400_at    | AE000663    | BC048599         | cDNA sequence BC048599                                                                                                                          |
| 93386_at    | AF016712    | Amac1            | acyl-malonyl condensing enzyme 1                                                                                                                |
| 97264_r_at  | AI846289    | Csnk1d           | casein kinase 1, delta                                                                                                                          |
| 102330_at   | D86382      | Aif1             | allograft inflammatory factor 1                                                                                                                 |
| 93955_at    | D17569      | Zbbp             | zona pellucida binding protein                                                                                                                  |
| 93897_at    | AJ011834    | Theg             | testicular haploid expressed gene                                                                                                               |
| 92599_at    | AF029843    | Pgam2            | phosphoglycerate mutase 2                                                                                                                       |
| 160505_at   | AA499784    | 4922502D21Rik    | RIKEN cDNA 4922502D21 gene                                                                                                                      |

|             |          |                   |                                                                                    |
|-------------|----------|-------------------|------------------------------------------------------------------------------------|
| 104372_at   | AI836883 | Abhd8             | abhydrolase domain containing 8                                                    |
| 160634_at   | AI848201 | Pacrg             | Park2 co-regulated                                                                 |
| 100358_s_at | X58169   | Tcp10a /// Tcp10l | t-complex protein 10a /// t-complex protein 10b /// t-complex protein 10c          |
| 92805_s_at  | Y12577   | Arl4a             | ADP-ribosylation factor-like 4A                                                    |
| 161730_f_at | AV268095 | Iltgae            | integrin, alpha E, epithelial-associated                                           |
| 99545_at    | AF081947 | Tekt1             | tektin 1                                                                           |
| 102219_at   | X76089   | Rfx2              | regulatory factor X, 2 (influences HLA class II expression)                        |
| 161035_at   | AA122519 | Kif9              | kinesin family member 9                                                            |
| 102714_at   | L27086   | Hspa1l            | heat shock protein 1-like                                                          |
| 94971_at    | AI317217 | Cdkn3             | cyclin-dependent kinase inhibitor 3                                                |
| 160656_i_at | AF064448 | Fem1b             | feminization 1 homolog b (C. elegans)                                              |
| 99456_at    | D17573   | Acrbp             | proacrosin binding protein                                                         |
| 104667_at   | AC002397 | Lrrc23            | leucine rich repeat containing 23                                                  |
| 100058_at   | AW047776 | 2810453I06Rik     | RIKEN cDNA 2810453I06 gene                                                         |
| 103058_f_at | X58171   | Tcp10a            | t-complex protein 10a                                                              |
| 104439_at   | AI840198 | Nat6              | N-acetyltransferase 6                                                              |
| 100526_f_at | X64227   | Adam3             | a disintegrin and metallopeptidase domain 3 (cyritestin)                           |
| 94515_at    | AW208628 | Sqrl              | sulfide quinone reductase-like (yeast)                                             |
| 98984_f_at  | D50430   | Gpd2              | glycerol phosphate dehydrogenase 2, mitochondrial                                  |
| 160533_r_at | X12521   | Tnp1              | transition protein 1                                                               |
| 99455_s_at  | D17574   | Acrbp             | proacrosin binding protein                                                         |
| 97381_s_at  | X52128   | Tcp11             | t-complex protein 11                                                               |
| 101850_at   | Z46299   | Spa17             | sperm autoantigenic protein 17                                                     |
| 104528_at   | AI181549 | Znhi2             | zinc finger, HIT domain containing 2                                               |
| 92432_at    | AI844359 | Zfp574            | zinc finger protein 574                                                            |
| 97481_r_at  | U95607   | Dnajb3            | DnaJ (Hsp40) homolog, subfamily B, member 3                                        |
| 102994_at   | U06923   | Stat4             | signal transducer and activator of transcription 4                                 |
| 97811_at    | AI844507 | Arfgap3           | ADP-ribosylation factor GTPase activating protein 3                                |
| 97745_at    | M27432   | Hoxa4             | homeo box A4                                                                       |
| 101839_at   | AE000663 | 1700074P13Rik     | RIKEN cDNA 1700074P13 gene                                                         |
| 93409_at    | AA139057 | ---               | ---                                                                                |
| 95527_at    | AJ132771 | Chaf1a            | chromatin assembly factor 1, subunit A (p150)                                      |
| 104166_at   | AB022695 | Rage              | renal tumor antigen                                                                |
| 92825_at    | M25533   | Crisp2            | cysteine-rich secretory protein 2                                                  |
| 94927_at    | U96149   | Fabp9             | fatty acid binding protein 9, testis                                               |
| 101390_at   | AF027131 | Muc3 /// LOC666   | mucin 3, intestinal /// similar to mucin 17 /// similar to mucin 17                |
| 102795_at   | D83674   | Mesp1             | mesoderm posterior 1                                                               |
| 103245_at   | S49926   | Cst8              | cystatin 8 (cystatin-related epididymal spermatogenic)                             |
| 99036_s_at  | AB005654 | Map2k7            | mitogen activated protein kinase kinase 7                                          |
| 101417_at   | AF020191 | Dmrtb1            | DMRT-like family B with proline-rich C-terminal, 1                                 |
| 100287_at   | AJ010637 | Igbp1b            | immunoglobulin (CD79A) binding protein 1b                                          |
| 92911_at    | X84311   | Ccna1             | cyclin A1                                                                          |
| 97287_at    | AW046638 | Pdzk1             | PDZ domain containing 1                                                            |
| 100359_at   | M22602   | Tcp10b            | t-complex protein 10b                                                              |
| 92966_g_at  | J04698   | Chme              | cholinergic receptor, nicotinic, epsilon polypeptide                               |
| 97288_at    | AW260404 | Pdzk1             | PDZ domain containing 1                                                            |
| 104622_at   | D86081   | Toea2             | transcription elongation factor A (SII), 2                                         |
| 99011_at    | U70538   | Galnt3            | UDP-N-acetyl-alpha-D-galactosamine:polypeptide N-acetylgalactosaminyltransferase 3 |
| 99474_at    | U22059   | Adam5             | a disintegrin and metallopeptidase domain 5                                        |
| 104674_s_at | L21221   | Pcsk4             | proprotein convertase subtilisin/kexin type 4                                      |
| 92405_at    | AF020773 | Kpna6             | karyopherin (importin) alpha 6                                                     |
| 97377_at    | AI843554 | Coil              | coilin                                                                             |
| 161853_f_at | AV336804 | Prkcq             | protein kinase C, theta                                                            |
| 104726_at   | AA670737 | 1700013L23Rik     | RIKEN cDNA 1700013L23 gene                                                         |
| 161475_f_at | AV044731 | Cox8c             | cytochrome c oxidase, subunit VIIIc                                                |
| 160861_s_at | AI385600 | Pde1a             | phosphodiesterase 1A, calmodulin-dependent                                         |
| 162454_f_at | AV039214 | ---               | ---                                                                                |
| 92419_at    | AB022086 | Cct6b             | chaperonin subunit 6b (zeta)                                                       |
| 98311_at    | AB029919 | Pmfbp1            | polyamine modulated factor 1 binding protein 1                                     |
| 100320_at   | AF020771 | Kpna4             | karyopherin (importin) alpha 4                                                     |
| 161388_f_at | AV254224 | Tenr              | testis nuclear RNA binding protein                                                 |
| 99138_at    | AA756292 | Rcc1              | regulator of chromosome condensation 1                                             |
| 102970_at   | AB000121 | Psmc3ip           | proteasome (prosome, macropain) 26S subunit, ATPase 3, interacting protein         |
| 101551_s_at | X78989   | Tes               | testis derived transcript                                                          |
| 160729_f_at | AI046575 | Fabp9             | fatty acid binding protein 9, testis                                               |
| 92743_at    | U33958   | Spam1             | sperm adhesion molecule 1                                                          |
| 97661_at    | X84693   | Tenr              | testis nuclear RNA binding protein                                                 |

|             |          |               |                                                                                                               |
|-------------|----------|---------------|---------------------------------------------------------------------------------------------------------------|
| 99529_f_at  | AB025011 | Rnf138        | ring finger protein 138                                                                                       |
| 92820_at    | AI846522 | Usp2          | ubiquitin specific peptidase 2                                                                                |
| 99873_at    | AF045150 | Nkx2-6        | NK2 transcription factor related, locus 6 (Drosophila)                                                        |
| 94477_at    | AW123796 | ---           | ---                                                                                                           |
| 160985_at   | AV279590 | 4930579C15Rik | RIKEN cDNA 4930579C15 gene                                                                                    |
| 92377_at    | AI844960 | Gm1060        | gene model 1060, (NCBI)                                                                                       |
| 101195_at   | X65979   | Mylc2pl       | myosin light chain 2, precursor lymphocyte-specific                                                           |
| 102061_at   | AF100171 | Mlf1          | myeloid leukemia factor 1                                                                                     |
| 104423_at   | AW212532 | Dtl           | denticleless homolog (Drosophila)                                                                             |
| 103563_at   | AW125713 | Ibrdc3        | IBR domain containing 3                                                                                       |
| 100972_s_at | AW124975 | Ccl27         | chemokine (C-C motif) ligand 27                                                                               |
| 160325_r_at | L22067   | Cdv3          | carnitine deficiency-associated gene expressed in ventricle 3                                                 |
| 93675_at    | X66983   | Mak           | male germ cell-associated kinase                                                                              |
| 92386_at    | AI835016 | Hps4          | Hermansky-Pudlak syndrome 4 homolog (human)                                                                   |
| 161224_f_at | AV258262 | Ace           | angiotensin I converting enzyme (peptidyl-dipeptidase A) 1                                                    |
| 97480_f_at  | U95607   | Dnajb3        | DnaJ (Hsp40) homolog, subfamily B, member 3                                                                   |
| 99111_at    | U09874   | Clpb          | ClpB caseinolytic peptidase B homolog (E. coli)                                                               |
| 94079_at    | X61452   |               | 37502 septin 4                                                                                                |
| 99522_at    | D87326   | Gsg2          | germ cell-specific gene 2                                                                                     |
| 100931_at   | X73230   | Arsa          | arylsulfatase A                                                                                               |
| 97351_i_at  | AW123567 | Cox6b2        | cytochrome c oxidase subunit VIb polypeptide 2                                                                |
| 92732_at    | U16242   | Adam2         | a disintegrin and metallopeptidase domain 2                                                                   |
| 99995_at    | D16301   | Cetrn1        | centrin 1                                                                                                     |
| 92261_at    | AW047467 | Coq4          | coenzyme Q4 homolog (yeast)                                                                                   |
| 161046_at   | AA270365 | Crif1         | cytokine receptor-like factor 1                                                                               |
| 98994_at    | AF081499 | Slc34a2       | solute carrier family 34 (sodium phosphate), member 2                                                         |
| 103489_at   | AA921481 | Ubx5          | UBX domain containing 5                                                                                       |
| 161065_at   | AI507039 | Dpep3         | dipeptidase 3                                                                                                 |
| 160123_at   | AI835524 | Phpt1         | phosphohistidine phosphatase 1                                                                                |
| 97928_at    | AW045278 | Cln6          | ceroid-lipofuscinosis, neuronal 6                                                                             |
| 93853_at    | AA763918 | Dnajb4        | DnaJ (Hsp40) homolog, subfamily B, member 4                                                                   |
| 96515_at    | U70430   | Il4i1         | interleukin 4 induced 1                                                                                       |
| 96918_at    | AI790931 | Fbp1          | fructose biphosphatase 1                                                                                      |
| 160644_at   | AI314106 | Ggnbp1        | gametogenetin binding protein 1                                                                               |
| 102052_at   | AA871791 | Abhd5         | abhydrolase domain containing 5                                                                               |
| 100438_at   | U46923   | Gpr19         | G protein-coupled receptor 19                                                                                 |
| 104593_at   | AI849396 | Ccdc101       | coiled-coil domain containing 101                                                                             |
| 95600_at    | AJ130975 | Arih2         | ariadne homolog 2 (Drosophila)                                                                                |
| 101859_at   | AB010100 | Aqp7          | aquaporin 7                                                                                                   |
| 100291_at   | X57111   | Cbl           | Casitas B-lineage lymphoma                                                                                    |
| 97937_at    | AA611766 | Klf5          | Kruppel-like factor 5                                                                                         |
| 162047_f_at | AV264876 | ---           | ---                                                                                                           |
| 97893_at    | AB017697 | Tbp1          | TATA box binding protein-like 1                                                                               |
| 93711_at    | D12713   | Sec23a        | SEC23A (S. cerevisiae)                                                                                        |
| 97252_at    | AW120926 | 2610012O22Rik | RIKEN cDNA 2610012O22 gene                                                                                    |
| 100318_at   | AI892206 | Dnajb13       | DnaJ (Hsp40) related, subfamily B, member 13                                                                  |
| 99410_at    | AF039213 | Kcnu1         | potassium channel, subfamily U, member 1                                                                      |
| 94741_at    | AB008911 | Tesp2         | testicular serine protease 2                                                                                  |
| 102033_at   | AB003494 | Tesk1         | testis specific protein kinase 1                                                                              |
| 103596_at   | AF085219 | Dgka          | diacylglycerol kinase, alpha                                                                                  |
| 103646_at   | X85983   | Crat          | carnitine acetyltransferase                                                                                   |
| 101836_at   | D45859   | Ppm1b         | protein phosphatase 1B, magnesium dependent, beta isoform                                                     |
| 160122_at   | AW061161 | Asrgl1        | asparaginase like 1                                                                                           |
| 92821_at    | AF079565 | Usp2          | ubiquitin specific peptidase 2                                                                                |
| 97971_at    | AI852148 | Phkg2         | phosphorylase kinase, gamma 2 (testis)                                                                        |
| 99055_at    | X94000   | St6galnac2    | ST6 (alpha-N-acetyl-neuraminyl-2,3-beta-galactosyl-1,3)-N-acetylgalactosaminide alpha-2,6-sialyltransferase 2 |
| 101938_at   | X75959   | Pabpc2        | poly A binding protein, cytoplasmic 2                                                                         |
| 104029_at   | U08373   | Clgn          | calmegin                                                                                                      |
| 101707_at   | X99273   | Aldh1a2       | aldehyde dehydrogenase family 1, subfamily A2                                                                 |
| 96237_at    | AI118905 | BC054059      | cDNA sequence BC054059                                                                                        |
| 96801_at    | AJ010108 | Ak1           | adenylate kinase 1                                                                                            |
| 97704_at    | AA414990 | Eil2          | elongation factor RNA polymerase II 2                                                                         |
| 161577_f_at | AV284166 | Ccdc96        | coiled-coil domain containing 96                                                                              |
| 100539_at   | AI841279 | Acot7         | acyl-CoA thioesterase 7                                                                                       |
| 99489_at    | U23921   | Hspa4l        | heat shock protein 4 like                                                                                     |
| 98016_at    | AA981268 | D3Wsu161e     | DNA segment, Chr 3, Wayne State University 161, expressed                                                     |
| 103993_at   | AC002397 | Spsb2         | spA/ryanodine receptor domain and SOCS box containing 2                                                       |

|             |          |                  |                                                                                                                                |
|-------------|----------|------------------|--------------------------------------------------------------------------------------------------------------------------------|
| 93201_at    | AI047912 | D1Pas1           | DNA segment, Chr 1, Pasteur Institute 1                                                                                        |
| 101945_g_at | U89352   | Lypla1           | lysophospholipase 1                                                                                                            |
| 93561_at    | AI844709 | Chchd6           | coiled-coil-helix-coiled-coil-helix domain containing 6                                                                        |
| 93804_at    | AI854156 | Slc2a3           | solute carrier family 2 (facilitated glucose transporter), member 3                                                            |
| 101838_r_at | AB007798 | Ppm1b            | protein phosphatase 1B, magnesium dependent, beta isoform                                                                      |
| 104328_at   | AA967194 | Aqp9             | aquaporin 9                                                                                                                    |
| 97785_at    | Y18506   | DOH6S2654E       | DNA segment, human D6S2654E                                                                                                    |
| 161240_f_at | AV270995 | ---              | ---                                                                                                                            |
| 160912_i_at | AV375944 | Pias2            | protein inhibitor of activated STAT 2                                                                                          |
| 99531_at    | AJ011734 | Syngn4           | synaptogyrin 4                                                                                                                 |
| 103343_at   | AI845815 | 5430432M24Rik    | RIKEN cDNA 5430432M24 gene                                                                                                     |
| 98428_at    | AJ246002 | Spast            | spastin                                                                                                                        |
| 95075_at    | AW229141 | Nup35            | nucleoporin 35                                                                                                                 |
| 161839_f_at | AV043011 | Ras12-9 /// LOC6 | RAS-like, family 2, locus 9 /// similar to RAN, member RAS oncogene family                                                     |
| 96337_at    | AF033350 | Gp1bb /// Sept5  | glycoprotein lb, beta polypeptide /// septin 5                                                                                 |
| 98992_at    | AB030483 | Eppb9            | endothelial precursor protein B9                                                                                               |
| 103432_at   | AW122677 | Isg20            | interferon-stimulated protein                                                                                                  |
| 104737_at   | AA689670 | 2610528A11Rik    | RIKEN cDNA 2610528A11 gene                                                                                                     |
| 93182_at    | L08074   | Nkx6-2           | NK6 transcription factor related, locus 2 (Drosophila)                                                                         |
| 99504_at    | X80502   | St8sia3          | ST8 alpha-N-acetyl-neuraminide alpha-2,8-sialyltransferase 3                                                                   |
| 104301_at   | AI852414 | 2410018G20Rik    | RIKEN cDNA 2410018G20 gene                                                                                                     |
| 102063_at   | AF079535 | Pdpk1            | 3-phosphoinositide dependent protein kinase-1                                                                                  |
| 160941_at   | AF067806 | Pde8a            | phosphodiesterase 8A                                                                                                           |
| 102985_at   | AB012290 | Srpk1            | serine/arginine-rich protein specific kinase 1                                                                                 |
| 97352_f_at  | AW123567 | Cox6b2           | cytochrome c oxidase subunit VIb polypeptide 2                                                                                 |
| 101480_at   | AB010031 | Dnalc4           | dynein, axonemal, light chain 4                                                                                                |
| 96795_at    | AF098009 | Faah             | fatty acid amide hydrolase                                                                                                     |
| 93568_i_at  | AI853444 | LOC544988 /// LC | hypothetical protein LOC544988 /// hypothetical protein LOC545007 /// RIKEN cDNA 2610042L04 gene /// hypothetical protein LOC5 |
| 94956_at    | AF021031 | Dgcr6            | DiGeorge syndrome critical region gene 6                                                                                       |
| 99542_at    | M76728   | Pdha2            | pyruvate dehydrogenase E1 alpha 2                                                                                              |
| 160599_r_at | AA089009 | Tsga2            | testis specific gene A2                                                                                                        |
| 160623_at   | AI847045 | Cdkl2            | cyclin-dependent kinase-like 2 (CDC2-related kinase)                                                                           |
| 95011_at    | AI853090 | 1810063B07Rik    | RIKEN cDNA 1810063B07 gene                                                                                                     |
| 95760_at    | AI848730 | Elof1            | elongation factor 1 homolog (ELF1, S. cerevisiae)                                                                              |
| 94277_at    | U66257   | Mtx1             | metaxin 1                                                                                                                      |
| 92197_r_at  | X83733   | Sf3a2            | splicing factor 3a, subunit 2                                                                                                  |
| 97833_at    | AI853802 | Pfkp             | phosphofructokinase, platelet                                                                                                  |
| 95664_at    | AW048159 | ---              | ---                                                                                                                            |
| 92691_at    | AW048155 | Ppp2r2b          | protein phosphatase 2 (formerly 2A), regulatory subunit B (PR 52), beta isoform                                                |
| 161034_at   | AA607557 | Pla2g10          | phospholipase A2, group X                                                                                                      |
| 97992_at    | AI848304 | Smg5             | Smg-5 homolog, nonsense mediated mRNA decay factor (C. elegans)                                                                |
| 98334_at    | AF001104 | Crtam            | cytotoxic and regulatory T cell molecule                                                                                       |
| 93389_at    | AF039663 | Prom1            | prominin 1                                                                                                                     |
| 94891_s_at  | M27938   | Mea1             | male enhanced antigen 1                                                                                                        |
| 99163_at    | AI844232 | 4921506J03Rik    | RIKEN cDNA 4921506J03 gene                                                                                                     |
| 161041_at   | AW047046 | Ddx25            | DEAD (Asp-Glu-Ala-Asp) box polypeptide 25                                                                                      |
| 97760_at    | M21041   | Mtap2 /// A73003 | microtubule-associated protein 2 /// hypothetical protein A730034C02                                                           |
| 93560_at    | AI845882 | Acyp1            | acylphosphatase 1, erythrocyte (common) type                                                                                   |
| 100965_at   | AA108893 | Cox8c            | cytochrome c oxidase, subunit VIIIc                                                                                            |
| 161243_f_at | AV284333 | Abhd8            | abhydrolase domain containing 8                                                                                                |
| 93658_at    | D64141   | Ptpn20           | protein tyrosine phosphatase, non-receptor type 20                                                                             |
| 104603_at   | X98056   | Gstt2            | glutathione S-transferase, theta 2                                                                                             |
| 102948_at   | AJ242830 | LOC625599        | similar to Glycosyl-phosphatidylinositol-anchored molecule-like protein precursor                                              |
| 93640_s_at  | AB000682 | Tex21            | testis expressed gene 21                                                                                                       |
| 95662_at    | AW211667 | X83328           | EST X83328                                                                                                                     |
| 96799_at    | AA822413 | Fbxw5            | F-box and WD-40 domain protein 5                                                                                               |
| 97834_g_at  | AI853802 | Pfkp             | phosphofructokinase, platelet                                                                                                  |
| 94540_at    | AI595772 | Cyp2d26          | cytochrome P450, family 2, subfamily d, polypeptide 26                                                                         |
| 160946_at   | AF022792 | Usp12            | ubiquitin specific peptidase 12                                                                                                |
| 97518_at    | D29016   | Fdft1            | farnesyl diphosphate farnesyl transferase 1                                                                                    |
| 92678_at    | AA982686 | Ddx25            | DEAD (Asp-Glu-Ala-Asp) box polypeptide 25                                                                                      |
| 103960_at   | U73941   | Rap2ip           | Rap2 interacting protein                                                                                                       |
| 100629_at   | U24428   | Gstm5            | glutathione S-transferase, mu 5                                                                                                |
| 161033_at   | AB030729 | Pap0lb           | poly (A) polymerase beta (testis specific)                                                                                     |
| 99816_at    | M20567   | Hspa2            | heat shock protein 2                                                                                                           |
| 96935_at    | AW011791 | Pdzk1ip1         | PDZK1 interacting protein 1                                                                                                    |
| 96284_at    | AW121446 | Csnk1g2          | casein kinase 1, gamma 2                                                                                                       |

|             |          |                   |                                                                                                                           |
|-------------|----------|-------------------|---------------------------------------------------------------------------------------------------------------------------|
| 160818_at   | AW124130 | Lrrfp2            | leucine rich repeat (in FLII) interacting protein 2                                                                       |
| 93569_f_at  | AI853444 | LOC544988 /// B1  | hypothetical protein LOC544988 /// RIKEN cDNA B930046C15 gene /// hypothetical protein LOC545007 /// RIKEN cDNA 2610042LC |
| 93103_at    | M17587   | Ldhc              | lactate dehydrogenase C                                                                                                   |
| 101857_at   | AB006036 | Srpk2             | serine/arginine-rich protein specific kinase 2                                                                            |
| 97965_at    | U88624   | Pla2g6            | phospholipase A2, group VI                                                                                                |
| 95351_at    | AA414339 | Ncoa6             | nuclear receptor coactivator 6                                                                                            |
| 94400_at    | AI843094 | 1110051M20Rik     | RIKEN cDNA 1110051M20 gene                                                                                                |
| 103618_at   | AI181132 | Ckmt2             | creatine kinase, mitochondrial 2                                                                                          |
| 92841_f_at  | X51429   | Chgb              | chromogranin B                                                                                                            |
| 93099_f_at  | U01063   | Plk1              | polo-like kinase 1 (Drosophila)                                                                                           |
| 101885_at   | X59728   | Gas5              | growth arrest specific 5                                                                                                  |
| 94102_at    | AF009614 | Hmx1              | H6 homeo box 1                                                                                                            |
| 92953_at    | U60969   | Fmn1              | formin 1                                                                                                                  |
| 92423_at    | AF070970 | Pard6a            | par-6 (partitioning defective 6,) homolog alpha (C. elegans)                                                              |
| 93221_at    | X56561   | Hoxd8             | homeo box D8                                                                                                              |
| 100410_at   | AW122781 | C330027G06Rik     | RIKEN cDNA C330027G06 gene                                                                                                |
| 103468_at   | D14849   | Mns1              | meiosis-specific nuclear structural protein 1                                                                             |
| 93802_at    | AA815890 | Mtdh              | Metadherin                                                                                                                |
| 103233_at   | AF077660 | Hipk3             | homeodomain interacting protein kinase 3                                                                                  |
| 93918_at    | AA673500 | Taf9              | TAF9 RNA polymerase II, TATA box binding protein (TBP)-associated factor                                                  |
| 97391_at    | AW012196 | D14Erd500e        | DNA segment, Chr 14, ERATO Doi 500, expressed                                                                             |
| 96511_s_at  | D83266   | Vav1              | vav 1 oncogene                                                                                                            |
| 92639_at    | U80932   | Aurka             | aurora kinase A                                                                                                           |
| 160755_at   | AA007891 | Kif2c /// LOC6316 | kinesin family member 2C /// similar to Kinesin-like protein KIF2C (Mitotic centromere-associated kinesin) (MCAK)         |
| 102011_at   | AI850992 | 2610507L03Rik     | RIKEN cDNA 2610507L03 gene                                                                                                |
| 101350_g_at | U73170   | Plk1              | polo-like kinase 1 (Drosophila)                                                                                           |
| 93390_g_at  | AF039663 | Prom1             | prominin 1                                                                                                                |
| 97210_at    | AW048446 | 1700037H04Rik     | RIKEN cDNA 1700037H04 gene                                                                                                |
| 96679_at    | AW120711 | Dnajb9            | DnaJ (Hsp40) homolog, subfamily B, member 9                                                                               |
| 101860_at   | AA756568 | Gmfb              | glia maturation factor, beta                                                                                              |
| 104604_at   | U62908   | Zfp96             | zinc finger protein 96                                                                                                    |
| 96217_at    | AW060552 | Polb              | polymerase (DNA directed), beta                                                                                           |
| 95503_at    | U95498   | Mllt11            | myeloid/lymphoid or mixed-lineage leukemia (trithorax homolog, Drosophila); translocated to, 11                           |
| 101068_at   | AA656621 | Mkrm1             | makorin, ring finger protein, 1                                                                                           |
| 102324_at   | AF036875 | Dnajc4            | DnaJ (Hsp40) homolog, subfamily C, member 4                                                                               |
| 103475_s_at | AF079096 | Ate1              | arginine-tRNA-protein transferase 1                                                                                       |
| 161398_at   | AV274650 | Dnahc8            | dynein, axonemal, heavy chain 8                                                                                           |
| 95877_at    | C78858   | 2610020H08Rik     | RIKEN cDNA 2610020H08 gene                                                                                                |
| 101155_at   | X61754   | Hsf2              | heat shock factor 2                                                                                                       |
| 100042_at   | AI837921 | Hagh              | hydroxyacyl glutathione hydrolase                                                                                         |
| 95551_at    | AI849232 | R3hcc1            | R3H domain and coiled-coil containing 1                                                                                   |
| 104638_at   | U31510   | Art1              | ADP-ribosyltransferase 1                                                                                                  |
| 103293_at   | AF079901 | Gosr1             | golgi SNAP receptor complex member 1                                                                                      |
| 92929_at    | M20625   | Cyct              | cytochrome c, testis                                                                                                      |
| 93870_at    | M64429   | Braf              | Braf transforming gene                                                                                                    |
| 100885_at   | AF013166 | Nek2              | NIMA (never in mitosis gene a)-related expressed kinase 2                                                                 |
| 98614_at    | AJ243223 | Nphp1             | nephronophthisis 1 (juvenile) homolog (human)                                                                             |
| 104115_at   | AA867340 | Psme4             | proteasome (prosome, macropain) activator subunit 4                                                                       |
| 103700_r_at | AI646638 | Frat2             | Frequently rearranged in advanced T-cell lymphomas 2                                                                      |
| 162313_f_at | AV055653 | ---               | ---                                                                                                                       |
| 101837_g_at | D45859   | Ppm1b             | protein phosphatase 1B, magnesium dependent, beta isoform                                                                 |
| 96640_at    | AI644158 | 3110001A13Rik     | RIKEN cDNA 3110001A13 gene                                                                                                |
| 99982_at    | U19799   | Nfkbib            | nuclear factor of kappa light chain gene enhancer in B-cells inhibitor, beta                                              |
| 160761_at   | AA915203 | Pde4dip           | phosphodiesterase 4D interacting protein (myomegalin)                                                                     |
| 99591_i_at  | AB030505 | Rdh11             | retinol dehydrogenase 11                                                                                                  |
| 161389_f_at | AV255078 | Asnsd1            | asparagine synthetase domain containing 1                                                                                 |
| 95137_at    | AI852985 | Tmem97            | transmembrane protein 97                                                                                                  |
| 160992_at   | AI035432 | Ccdc93            | coiled-coil domain containing 93                                                                                          |
| 95561_at    | AW120867 | Syce2             | synaptonemal complex central element protein 2                                                                            |
| 94162_at    | D14859   | Ddx4              | DEAD (Asp-Glu-Ala-Asp) box polypeptide 4                                                                                  |
| 99950_at    | D01034   | Tbp               | TATA box binding protein                                                                                                  |
| 101108_at   | AF034610 | Nasp              | nuclear autoantigenic sperm protein (histone-binding)                                                                     |
| 96106_at    | AW049122 | Rnaseh2a          | ribonuclease H2, large subunit                                                                                            |
| 101942_at   | AA839050 | Sfrs14            | splicing factor, arginine/serine-rich 14                                                                                  |
| 160422_at   | AB013912 | Ruvbl2            | RuvB-like protein 2                                                                                                       |
| 160429_at   | AW121314 | Nxt1              | NTF2-related export protein 1                                                                                             |
| 98945_at    | AW125190 | Sh3glb1           | SH3-domain GRB2-like B1 (endophilin)                                                                                      |

|             |          |               |                                                                       |
|-------------|----------|---------------|-----------------------------------------------------------------------|
| 103364_f_at | AW045256 | 5730494M16Rik | RIKEN cDNA 5730494M16 gene                                            |
| 103254_at   | AW049897 | Traf1         | TRAF type zinc finger domain containing 1                             |
| 103541_at   | U46151   | Tcte2         | t-complex-associated testis expressed 2                               |
| 95915_at    | AA409520 | Gpatc2        | G patch domain containing 2                                           |
| 104675_at   | D01093   | Pcsk4         | proprotein convertase subtilisin/kexin type 4                         |
| 102949_g_at | AJ242830 | Hemt1         | hematopoietic cell transcript 1                                       |
| 161000_i_at | AA275196 | Nusap1        | nucleolar and spindle associated protein 1                            |
| 160234_at   | AI848382 | Usp1          | ubiquitin specific peptidase 1                                        |
| 103734_at   | AA985771 | Ahi1          | Abelson helper integration site                                       |
| 160631_s_at | AV206713 | Sgca          | sarcoglycan, alpha (dystrophin-associated glycoprotein)               |
| 96162_at    | AA683807 | Fbxo15        | F-box protein 15                                                      |
| 100126_at   | AA967263 | Chrac1        | chromatin accessibility complex 1                                     |
| 93557_at    | U43285   | Seps2         | selenophosphate synthetase 2                                          |
| 99337_at    | AI844631 | Baiap2        | brain-specific angiogenesis inhibitor 1-associated protein 2          |
| 94048_at    | AW120683 | Cdc34         | cell division cycle 34 homolog (S. cerevisiae)                        |
| 95416_at    | AI642184 | Usp15         | ubiquitin specific peptidase 15                                       |
| 97368_at    | U95145   | Akap1         | A kinase (PRKA) anchor protein 1                                      |
| 93961_at    | U12236   | Itgae         | integrin, alpha E, epithelial-associated                              |
| 94294_at    | X66032   | Ccnb2         | cyclin B2                                                             |
| 104346_at   | AI841914 | Acbd6         | acyl-Coenzyme A binding domain containing 6                           |
| 160876_at   | X78684   | Bcap29        | B-cell receptor-associated protein 29                                 |
| 104485_at   | AI552398 | 4930527D15Rik | RIKEN cDNA 4930527D15 gene                                            |
| 98603_s_at  | U20857   | Rangap1       | RAN GTPase activating protein 1                                       |
| 100018_at   | X71327   | Mtf1          | metal response element binding transcription factor 1                 |
| 101466_at   | D50264   | Pigf          | phosphatidylinositol glycan, class F                                  |
| 104135_at   | AW045474 | Arl3          | ADP-ribosylation factor-like 3                                        |
| 99134_at    | U21673   | Tcte3         | t-complex-associated testis expressed 3                               |
| 100990_g_at | AJ001373 | Itgb1bp1      | integrin beta 1 binding protein 1                                     |
| 160853_at   | AI840922 | Ptdss2        | phosphatidylserine synthase 2                                         |
| 102079_at   | AF069744 | Aym1          | activator of yeast meiotic promoters 1                                |
| 101312_at   | D10651   | Grin2b        | glutamate receptor, ionotropic, NMDA2B (epsilon 2)                    |
| 103799_at   | AF073881 | Mtmr9         | myotubularin related protein 9                                        |
| 101978_at   | AI840329 | Phospho2      | phosphatase, orphan 2                                                 |
| 161064_f_at | AI427892 | Phf7          | PHD finger protein 7                                                  |
| 96494_at    | AA691628 | Klh24         | kelch-like 24 (Drosophila)                                            |
| 104544_at   | AA675604 | 4930517K11Rik | RIKEN cDNA 4930517K11 gene                                            |
| 92965_at    | J04698   | Chrne         | cholinergic receptor, nicotinic, epsilon polypeptide                  |
| 101062_at   | AF054670 | Hmox2         | heme oxygenase (decycling) 2                                          |
| 93864_s_at  | U72521   | Enah          | enabled homolog (Drosophila)                                          |
| 93162_f_at  | AF045953 | ORF9          | open reading frame 9                                                  |
| 101907_s_at | X76085   | Ceacam2       | CEA-related cell adhesion molecule 2                                  |
| 97442_at    | AW124340 | Slc39a8       | solute carrier family 39 (metal ion transporter), member 8            |
| 95755_at    | D14485   | Csda          | cold shock domain protein A                                           |
| 99104_at    | U49915   | Adipoq        | adiponectin, C1Q and collagen domain containing                       |
| 161519_f_at | AV210958 | ---           | ---                                                                   |
| 92195_at    | AB012273 | Cebpg         | CCAAT/enhancer binding protein (C/EBP), gamma                         |
| 103689_at   | AA833514 | Abcc3         | ATP-binding cassette, sub-family C (CFTR/MRP), member 3               |
| 104207_at   | AI430272 | 6330505N24Rik | RIKEN cDNA 6330505N24 gene                                            |
| 160220_at   | AJ242914 | Zfp110        | zinc finger protein 110                                               |
| 103656_at   | Y16518   | Lancl1        | LanC (bacterial lantibiotic synthetase component C)-like 1            |
| 160749_at   | AI846812 | 1500011H22Rik | RIKEN cDNA 1500011H22 gene                                            |
| 103094_at   | AI036894 | Serf1         | small EDRK-rich factor 1                                              |
| 102732_at   | AI849746 | Tin1          | talin 1                                                               |
| 98508_s_at  | D84376   | Ppap2a        | phosphatidic acid phosphatase 2a                                      |
| 101521_at   | AB013819 | Birc5         | baculoviral IAP repeat-containing 5                                   |
| 100225_f_at | AA409481 | Psmc3         | proteasome (prosome, macropain) 26S subunit, ATPase 3                 |
| 160204_at   | AI838470 | Prr6          | proline-rich polypeptide 6                                            |
| 160214_at   | AW122235 | Lancl2        | LanC (bacterial lantibiotic synthetase component C)-like 2            |
| 96263_at    | AW124933 | Rshl2         | radial spokehead-like 2                                               |
| 160262_at   | AI839901 | Mtch2         | mitochondrial carrier homolog 2 (C. elegans)                          |
| 97285_f_at  | AW120609 | Ubx1          | UBX domain containing 1                                               |
| 101956_at   | AI834849 | Ckap4         | cytoskeleton-associated protein 4                                     |
| 102626_r_at | AF080070 | Zfp54         | zinc finger protein 54                                                |
| 160501_at   | Y09632   | Kif20a        | kinesin family member 20A                                             |
| 160839_at   | AI606956 | Slc2a5        | solute carrier family 2 (facilitated glucose transporter), member 5   |
| 98445_at    | AW125311 | Gga1          | golgi associated, gamma adaptin ear containing, ARF binding protein 1 |
| 99869_at    | D63663   | Hdgfl1        | hepatoma derived growth factor-like 1                                 |

|             |          |                  |                                                                                 |
|-------------|----------|------------------|---------------------------------------------------------------------------------|
| 96678_at    | AW260761 | Dhrs4            | dehydrogenase/reductase (SDR family) member 4                                   |
| 104097_at   | AF002823 | Bub1             | budding uninhibited by benzimidazoles 1 homolog (S. cerevisiae)                 |
| 100630_f_at | AA241764 | Gstm5            | glutathione S-transferase, mu 5                                                 |
| 96348_at    | AW121217 | Pnpla2           | patatin-like phospholipase domain containing 2                                  |
| 96319_at    | AW061324 | Cdc20            | cell division cycle 20 homolog (S. cerevisiae)                                  |
| 104409_at   | D10011   | Grik5            | glutamate receptor, ionotropic, kainate 5 (gamma 2)                             |
| 103405_at   | AI845617 | 2610019A05Rik    | RIKEN cDNA 2610019A05 gene                                                      |
| 99578_at    | U01915   | Top2a            | topoisomerase (DNA) II alpha                                                    |
| 104444_at   | AA689927 | 9430098E02Rik    | RIKEN cDNA 9430098E02 gene                                                      |
| 99645_at    | AW048484 | 4921506J03Rik    | RIKEN cDNA 4921506J03 gene                                                      |
| 97436_at    | AA869653 | Man2c1           | mannosidase, alpha, class 2C, member 1                                          |
| 94897_at    | D87896   | Gpx4             | glutathione peroxidase 4                                                        |
| 93219_at    | Y17343   | Acp1             | acid phosphatase 1, soluble                                                     |
| 160900_at   | AI847897 | Gkap1 /// LOC67: | G kinase anchoring protein 1 /// similar to G kinase anchoring protein 1        |
| 92190_at    | U28280   | Nr2c1            | nuclear receptor subfamily 2, group C, member 1                                 |
| 93283_at    | AA869401 | Aprt             | adenine phosphoribosyl transferase                                              |
| 101083_s_at | AF109905 | Lsm2             | LSM2 homolog, U6 small nuclear RNA associated (S. cerevisiae)                   |
| 104312_at   | AW123271 | Abhd14a          | abhydrolase domain containing 14A                                               |
| 97488_at    | AI595893 | 1200011O22Rik    | RIKEN cDNA 1200011O22 gene                                                      |
| 95032_at    | AA856349 | Prc1             | protein regulator of cytokinesis 1                                              |
| 99023_at    | U57747   | Pafah1b2         | platelet-activating factor acetylhydrolase, isoform 1b, alpha2 subunit          |
| 98129_at    | AI852553 | Tmsb10           | thymosin, beta 10                                                               |
| 95123_at    | AI844003 | 4930566A11Rik    | RIKEN cDNA 4930566A11 gene                                                      |
| 92367_at    | U36778   | Stil             | Sci/Tal1 interrupting locus                                                     |
| 94367_at    | AI850362 | Uck2             | uridine-cytidine kinase 2                                                       |
| 103530_at   | AW049598 | Fancg            | Fanconi anemia, complementation group G                                         |
| 97400_at    | AW122420 | 1110039B18Rik    | RIKEN cDNA 1110039B18 gene                                                      |
| 104682_at   | AI848983 | Tuba8            | tubulin, alpha 8                                                                |
| 103286_at   | AB012611 | Stam2            | signal transducing adaptor molecule (SH3 domain and ITAM motif) 2               |
| 160189_at   | AI843747 | Nudt4            | nudix (nucleoside diphosphate linked moiety X)-type motif 4                     |
| 160487_at   | M19436   | Myl4             | myosin, light polypeptide 4                                                     |
| 93338_at    | AF007110 | Mdm4             | transformed mouse 3T3 cell double minute 4                                      |
| 98451_at    | AI843164 | Dnajb10          | DnaJ (Hsp40) homolog, subfamily B, member 10                                    |
| 160759_at   | AA597246 | Rfc2             | replication factor C (activator 1) 2                                            |
| 102584_at   | Y18280   | Dyrk1b           | dual-specificity tyrosine-(Y)-phosphorylation regulated kinase 1b               |
| 103617_at   | D63679   | Cd55             | CD55 antigen                                                                    |
| 160260_at   | AI836346 | Thoc7            | THO complex 7 homolog (Drosophila)                                              |
| 102379_at   | AW049415 | Rassf1           | Ras association (RalGDS/AF-6) domain family 1                                   |
| 94861_at    | AA624073 | 4930453N24Rik    | RIKEN cDNA 4930453N24 gene                                                      |
| 94088_at    | AW228429 | Ptbp2            | polypyrimidine tract binding protein 2                                          |
| 98617_at    | AF071186 | Wbp11            | WW domain binding protein 11                                                    |
| 160983_at   | AA790762 | 1810044D09Rik    | RIKEN cDNA 1810044D09 gene                                                      |
| 102400_at   | AW125118 | AU014645         | expressed sequence AU014645                                                     |
| 103101_at   | U79962   | Tarbp2           | TAR (HIV) RNA binding protein 2                                                 |
| 98972_at    | AI574262 | Usp8             | ubiquitin specific peptidase 8                                                  |
| 161086_at   | AF087695 | Lin7c            | lin-7 homolog C (C. elegans)                                                    |
| 95451_at    | AA855382 | 2810405J04Rik    | RIKEN cDNA 2810405J04 gene                                                      |
| 96707_at    | D10630   | Zipro1           | zinc finger proliferation 1                                                     |
| 101470_at   | AI851014 | Wdr78            | WD repeat domain 78                                                             |
| 103531_f_at | AI049144 | Ero1lb           | ERO1-like beta (S. cerevisiae)                                                  |
| 102858_at   | L02241   | Pkib             | protein kinase inhibitor beta, cAMP dependent, testis specific                  |
| 103092_at   | AW124316 | Trim37           | tripartite motif protein 37                                                     |
| 95618_at    | AI843884 | Rab11fip5        | RAB11 family interacting protein 5 (class I)                                    |
| 94366_at    | AW121767 | 2310079N02Rik    | RIKEN cDNA 2310079N02 gene                                                      |
| 160686_at   | AI836015 | Sltm             | SAFB-like, transcription modulator                                              |
| 99326_at    | U18119   | Pla2g2c          | phospholipase A2, group IIC                                                     |
| 92875_s_at  | AI852725 | Cops7a           | COP9 (constitutive photomorphogenic) homolog, subunit 7a (Arabidopsis thaliana) |
| 160948_at   | M81475   | Ppp3cc           | protein phosphatase 3, catalytic subunit, gamma isoform                         |
| 160790_s_at | AI746365 | Btrc             | beta-transducin repeat containing protein                                       |
| 96661_at    | AA734806 | Nrd1             | nardilysin, N-arginine dibasic convertase, NRD convertase 1                     |
| 162057_f_at | AV269118 | Mtdh             | Metadherin                                                                      |
| 100564_at   | AF068199 | Ddt              | D-dopachrome tautomerase                                                        |
| 98306_g_at  | Y11245   | Foxm1            | forkhead box M1                                                                 |
| 98029_at    | AW060459 | 3110056O03Rik    | RIKEN cDNA 3110056O03 gene                                                      |
| 93939_at    | U89993   | Lnk              | linker of T-cell receptor pathways                                              |
| 93080_at    | AF069954 | Bscl2            | Bernardinelli-Seip congenital lipodystrophy 2 homolog (human)                   |
| 92449_at    | AF002701 | Gfra2            | glial cell line derived neurotrophic factor family receptor alpha 2             |

|             |          |                   |                                                                                                                                            |
|-------------|----------|-------------------|--------------------------------------------------------------------------------------------------------------------------------------------|
| 96753_at    | Y11905   | Bcl7c             | B-cell CLL/lymphoma 7C                                                                                                                     |
| 160807_at   | AW124201 | Agpat3            | 1-acylglycerol-3-phosphate O-acyltransferase 3                                                                                             |
| 92708_at    | AI843597 | Ddx19b            | DEAD (Asp-Glu-Ala-Asp) box polypeptide 19b                                                                                                 |
| 93734_i_at  | D49686   | Psmc3             | proteasome (prosome, macropain) 26S subunit, ATPase 3                                                                                      |
| 96134_at    | AA755260 | Reep6             | receptor accessory protein 6                                                                                                               |
| 161392_f_at | AV257486 | Lrrc23            | leucine rich repeat containing 23                                                                                                          |
| 92790_at    | D55720   | Kpna2 /// LOC6705 | karyopherin (importin) alpha 2 /// similar to Importin alpha-2 subunit (Karyopherin alpha-2 subunit) (SRP1-alpha) (RAG cohort protein)     |
| 160793_at   | AI851313 | Pou6f1            | POU domain, class 6, transcription factor 1                                                                                                |
| 102117_at   | AI844445 | Rab14             | RAB, member of RAS oncogene family-like 4                                                                                                  |
| 160602_at   | AF039216 | Pde6d             | phosphodiesterase 6D, cGMP-specific, rod, delta                                                                                            |
| 103471_at   | AI194333 | Tbc1d15           | TBC1 domain family, member 15                                                                                                              |
| 95707_at    | AA615853 | 2900010M23Rik     | RIKEN cDNA 2900010M23 gene                                                                                                                 |
| 103397_at   | AA795486 | Hrb               | HIV-1 Rev binding protein                                                                                                                  |
| 100989_at   | AJ001373 | Itgb1bp1          | integrin beta 1 binding protein 1                                                                                                          |
| 101520_at   | AF032967 | Spata6            | spermatogenesis associated 6                                                                                                               |
| 94150_at    | M24086   | Sag               | retinal S-antigen                                                                                                                          |
| 100743_at   | AA407663 | D030070L09Rik     | RIKEN cDNA D030070L09 gene                                                                                                                 |
| 96046_at    | X98207   | Hdac1             | histone deacetylase 1                                                                                                                      |
| 100828_at   | AI648850 | Myl4              | myosin, light polypeptide 4                                                                                                                |
| 160290_at   | AI574278 | Ide               | insulin degrading enzyme                                                                                                                   |
| 96780_at    | AW208818 | 2410022L05Rik     | RIKEN cDNA 2410022L05 gene                                                                                                                 |
| 92984_g_at  | D49393   | Ptprj             | protein tyrosine phosphatase, receptor type, J                                                                                             |
| 94318_at    | Y11356   | ApoH              | apolipoprotein H                                                                                                                           |
| 97853_at    | AW047331 | Psp1              | PC4 and SFRS1 interacting protein 1                                                                                                        |
| 92584_at    | AI843556 | Nkiras2           | NFKB inhibitor interacting Ras-like protein 2                                                                                              |
| 92665_f_at  | X07967   | Xlr /// 3830403N1 | X-linked lymphocyte-regulated complex /// RIKEN cDNA 3830403N18 gene                                                                       |
| 103806_at   | AF064984 | Lrp5 /// LOC6705  | low density lipoprotein receptor-related protein 5 /// similar to Low-density lipoprotein receptor-related protein 5 precursor (LRP7) (Lr: |
| 93843_at    | AI845580 | Dhrs1             | dehydrogenase/reductase (SDR family) member 1                                                                                              |
| 160119_at   | AI845538 | Creld2            | cysteine-rich with EGF-like domains 2                                                                                                      |
| 161196_r_at | AV254135 | Adam3             | a disintegrin and metallopeptidase domain 3 (cyritestin)                                                                                   |
| 94517_r_at  | M55181   | Penk1             | preproenkephalin 1                                                                                                                         |
| 160863_at   | X69827   | Tulp2             | tubby-like protein 2                                                                                                                       |
| 96665_at    | AW211618 | Vps26a            | vacuolar protein sorting 26 homolog A (yeast)                                                                                              |
| 97446_at    | AW125010 | Dhx30             | DEAH (Asp-Glu-Ala-His) box polypeptide 30                                                                                                  |
| 103908_at   | AW121857 | Sdccag3           | serologically defined colon cancer antigen 3                                                                                               |
| 96224_at    | AF099932 | Btrc              | beta-transducin repeat containing protein                                                                                                  |
| 98032_at    | M36146   | Zfp35             | zinc finger protein 35                                                                                                                     |
| 97228_at    | AI844417 | Rogdi             | rogdi homolog (Drosophila)                                                                                                                 |
| 95061_at    | AI838996 | Bcas2             | breast carcinoma amplified sequence 2                                                                                                      |
| 99063_at    | AF036716 | Stx8              | syntaxin 8                                                                                                                                 |
| 96797_s_at  | AW122681 | Fbxw5             | F-box and WD-40 domain protein 5                                                                                                           |
| 92879_at    | U42383   | Ppm1g             | protein phosphatase 1G (formerly 2C), magnesium-dependent, gamma isoform                                                                   |
| 97536_at    | AW046650 | Wdtrc1            | WD and tetratricopeptide repeats 1                                                                                                         |
| 99160_s_at  | AW227647 | Grina             | glutamate receptor, ionotropic, N-methyl D-aspartate-associated protein 1 (glutamate binding)                                              |
| 103074_f_at | AI842969 | Taf9 /// LOC5456  | TAF9 RNA polymerase II, TATA box binding protein (TBP)-associated factor /// similar to TAF9 RNA polymerase II, TATA box bindin            |
| 101293_at   | Z84471   | G6pd2             | glucose-6-phosphate dehydrogenase 2                                                                                                        |
| 98831_at    | L13204   | Foxj1             | forkhead box J1                                                                                                                            |
| 104648_at   | AI844597 | Pacs1             | phosphofurin acidic cluster sorting protein 1                                                                                              |
| 93143_at    | AI844196 | 1190005I06Rik     | RIKEN cDNA 1190005I06 gene                                                                                                                 |
| 96527_at    | AI596614 | ---               | ---                                                                                                                                        |
| 93850_at    | AI642553 | Iqgap1            | IQ motif containing GTPase activating protein 1                                                                                            |
| 94218_at    | M20130   | Tcp1              | t-complex protein 1                                                                                                                        |
| 101944_at   | U89352   | Lypla1            | lysophospholipase 1                                                                                                                        |
| 103599_at   | M20824   | Mdm1              | transformed mouse 3T3 cell double minute 1                                                                                                 |
| 104625_at   | AA874130 | Dnajb6            | DnaJ (Hsp40) homolog, subfamily B, member 6                                                                                                |
| 99375_at    | Y09882   | Sec1              | secretory blood group 1                                                                                                                    |
| 96072_at    | M17516   | Ldha              | lactate dehydrogenase A                                                                                                                    |
| 98886_at    | AI835412 | 2810410M20Rik     | RIKEN cDNA 2810410M20 gene /// similar to AIP1                                                                                             |
| 93924_f_at  | M13443   | Tuba7             | tubulin, alpha 7                                                                                                                           |
| 97797_at    | AW123142 | Asnsd1            | asparagine synthetase domain containing 1                                                                                                  |
| 100530_at   | L07924   | Ralgds            | ral guanine nucleotide dissociation stimulator                                                                                             |
| 93210_g_at  | AJ223071 | Nek4              | NIMA (never in mitosis gene a)-related expressed kinase 4                                                                                  |
| 162491_f_at | AV140903 | Prr6              | proline-rich polypeptide 6                                                                                                                 |
| 160420_r_at | M13442   | Tuba3             | tubulin, alpha 3                                                                                                                           |
| 99938_at    | U02887   | Xrcc1             | X-ray repair complementing defective repair in Chinese hamster cells 1                                                                     |
| 92448_s_at  | AF079107 | Gfra2             | glial cell line derived neurotrophic factor family receptor alpha 2                                                                        |
| 92547_at    | AB011081 | Hip2              | huntingtin interacting protein 2                                                                                                           |

|             |          |                    |                                                                                                                                 |
|-------------|----------|--------------------|---------------------------------------------------------------------------------------------------------------------------------|
| 94376_s_at  | U60318   | Mre11a             | meiotic recombination 11 homolog A (S. cerevisiae)                                                                              |
| 96621_at    | AW048608 | Nop17              | NOP17                                                                                                                           |
| 92468_at    | AF028722 | Ankrd49            | ankyrin repeat domain 49                                                                                                        |
| 103201_at   | M86377   | Ttk                | Ttk protein kinase                                                                                                              |
| 97238_at    | AW209238 | Tacc3              | transforming, acidic coiled-coil containing protein 3                                                                           |
| 104556_at   | AI847766 | 4933426K21Rik      | RIKEN cDNA 4933426K21 gene                                                                                                      |
| 100973_i_at | AA672499 | Ccl27              | chemokine (C-C motif) ligand 27                                                                                                 |
| 98502_at    | AW060461 | Dusp19             | dual specificity phosphatase 19                                                                                                 |
| 101396_at   | AB008174 | Tcf2               | transcription factor 2                                                                                                          |
| 97812_at    | AF006465 | Ranbp9             | RAN binding protein 9                                                                                                           |
| 99147_at    | AI843986 | Znht1              | zinc finger, HIT domain containing 1                                                                                            |
| 101906_at   | AA032310 | Smc4l1 /// LOC63   | SMC4 structural maintenance of chromosomes 4-like 1 (yeast) /// similar to SMC4 structural maintenance of chromosomes 4-like 1  |
| 95368_at    | D86949   | Plxna2             | plexin A2                                                                                                                       |
| 99592_f_at  | AB030505 | Rdh11              | retinol dehydrogenase 11                                                                                                        |
| 161856_f_at | AV059766 | Kif20a             | kinesin family member 20A                                                                                                       |
| 97374_at    | AI840458 | 2810025M15Rik      | RIKEN cDNA 2810025M15 gene                                                                                                      |
| 104371_at   | AF078752 | Dgat1              | diacylglycerol O-acyltransferase 1                                                                                              |
| 103316_at   | AI642561 | Camsap1            | calmodulin regulated spectrin-associated protein 1                                                                              |
| 96786_s_at  | AA879929 | Ankrd47            | ankyrin repeat domain 47                                                                                                        |
| 99029_at    | AF077950 | Pias1              | protein inhibitor of activated STAT 1                                                                                           |
| 100398_at   | D12645   | Kif3a              | kinesin family member 3A                                                                                                        |
| 92692_at    | D88539   | Sypc1              | synaptonemal complex protein 1                                                                                                  |
| 97894_at    | AF109905 | Vars2              | valyl-tRNA synthetase 2                                                                                                         |
| 97204_s_at  | AI850983 | Dnajc15            | DnaJ (Hsp40) homolog, subfamily C, member 15                                                                                    |
| 93951_at    | AB029537 | Golga3             | golgi autoantigen, golgin subfamily a, 3                                                                                        |
| 97511_at    | AI846600 | Mgll               | monoglyceride lipase                                                                                                            |
| 92610_at    | M21332   | Rdbp               | RD RNA-binding protein                                                                                                          |
| 94892_r_at  | M27938   | Mea1               | male enhanced antigen 1                                                                                                         |
| 102421_at   | AI847950 | 2400010G15Rik      | RIKEN cDNA 2400010G15 gene                                                                                                      |
| 94406_at    | AJ242864 | Phtf1              | putative homeodomain transcription factor 1                                                                                     |
| 160698_s_at | AB011812 | Prkcd              | protein kinase C, delta                                                                                                         |
| 95448_at    | AI839371 | Psmc2              | proteasome (prosome, macropain) 26S subunit, ATPase 2                                                                           |
| 160071_at   | U95123   | Rpp30              | ribonuclease P/MRP 30 subunit (human)                                                                                           |
| 97979_at    | AI849126 | Ppp1r7             | protein phosphatase 1, regulatory (inhibitor) subunit 7                                                                         |
| 98586_at    | AW107230 | Nap11              | nucleosome assembly protein 1-like 1                                                                                            |
| 100963_at   | AI854243 | Pnkd               | paroxysmal nonkinesinogenic dyskinesia                                                                                          |
| 93408_at    | AI850482 | ---                | Transcribed locus                                                                                                               |
| 104238_at   | U60881   | Art5               | ADP-ribosyltransferase 5                                                                                                        |
| 94248_at    | M62419   | Ap1m1              | adaptor-related protein complex AP-1, mu subunit 1                                                                              |
| 97271_at    | AI845593 | Lsmd1              | LSM domain containing 1                                                                                                         |
| 101937_s_at | AF005423 | Clk4               | CDC like kinase 4                                                                                                               |
| 92486_at    | AB018436 | Slc22a21           | solute carrier family 22 (organic cation transporter), member 21                                                                |
| 95097_at    | AI851227 | Actr10             | ARP10 actin-related protein 10 homolog (S. cerevisiae)                                                                          |
| 94274_at    | AI837415 | Ube2s              | ubiquitin-conjugating enzyme E2S                                                                                                |
| 104260_at   | AW123061 | AW112037           | expressed sequence AW112037                                                                                                     |
| 100306_at   | AI510297 | 2700007P21Rik      | RIKEN cDNA 2700007P21 gene                                                                                                      |
| 100941_at   | AF039567 | Pias2              | protein inhibitor of activated STAT 2                                                                                           |
| 99564_at    | D87908   | Uhrf1              | ubiquitin-like, containing PHD and RING finger domains, 1                                                                       |
| 104531_at   | X60304   | Prkcd              | protein kinase C, delta                                                                                                         |
| 161474_r_at | AV043191 | Dpep3              | dipeptidase 3                                                                                                                   |
| 161575_f_at | AV280750 | Mapk10             | mitogen activated protein kinase 10                                                                                             |
| 99670_at    | L37296   | Bad                | Bcl-associated death promoter                                                                                                   |
| 103073_i_at | AI842969 | Taf9 /// LOC5456   | TAF9 RNA polymerase II, TATA box binding protein (TBP)-associated factor /// similar to TAF9 RNA polymerase II, TATA box bindin |
| 97551_at    | AI846182 | Hip1r              | huntingtin interacting protein 1 related                                                                                        |
| 101890_f_at | U53208   | Dnajc2             | DnaJ (Hsp40) homolog, subfamily C, member 2                                                                                     |
| 93138_at    | AI853219 | 2410012H22Rik      | RIKEN cDNA 2410012H22 gene                                                                                                      |
| 160635_at   | AI849070 | Stx18              | syntaxin 18                                                                                                                     |
| 104476_at   | U27177   | Rbl1               | retinoblastoma-like 1 (p107)                                                                                                    |
| 100502_at   | L76947   | Pde1c              | phosphodiesterase 1C                                                                                                            |
| 95460_at    | U70736   | Cops5              | COP9 (constitutive photomorphogenic) homolog, subunit 5 (Arabidopsis thaliana)                                                  |
| 100332_s_at | AF093853 | Prdx6 /// Prdx6-rs | peroxiredoxin 6 /// peroxiredoxin 6, related sequence 1                                                                         |
| 95471_at    | U22399   | Cdkn1c             | cyclin-dependent kinase inhibitor 1C (P57)                                                                                      |
| 98959_at    | AW120623 | 0610016J10Rik //   | RIKEN cDNA 0610016J10 gene /// hypothetical LOC619602                                                                           |
| 160648_at   | AI047076 | Fignl1             | fidgetin-like 1                                                                                                                 |
| 100992_at   | U63386   | Phc1               | polyhomeotic-like 1 (Drosophila)                                                                                                |
| 100553_at   | L46855   | Trim27             | tripartite motif protein 27                                                                                                     |
| 100054_s_at | AW123127 | D2Wsu81e           | DNA segment, Chr 2, Wayne State University 81, expressed                                                                        |

|             |          |                     |                                                                                                                                              |
|-------------|----------|---------------------|----------------------------------------------------------------------------------------------------------------------------------------------|
| 101429_at   | X67083   | Ddit3               | DNA-damage inducible transcript 3                                                                                                            |
| 161751_f_at | AV324916 | R3hcc1              | R3H domain and coiled-coil containing 1                                                                                                      |
| 161081_at   | AA733664 | Cpeb2               | cytoplasmic polyadenylation element binding protein 2                                                                                        |
| 97339_at    | AI841159 | Git1                | G protein-coupled receptor kinase-interactor 1                                                                                               |
| 96212_at    | AI853918 | 2310061I04Rik       | RIKEN cDNA 2310061I04 gene                                                                                                                   |
| 104045_at   | AW122372 | Tspyl4              | TSPY-like 4                                                                                                                                  |
| 95427_at    | AI843650 | Rpa1                | replication protein A1                                                                                                                       |
| 103551_at   | AW124208 | Plekha5             | pleckstrin homology domain containing, family A member 5                                                                                     |
| 100512_at   | AI838853 | Uchl5               | ubiquitin carboxyl-terminal esterase L5                                                                                                      |
| 103578_at   | AJ006972 | Tom1 /// LOC545     | target of myb1 homolog (chicken) /// similar to TOM1                                                                                         |
| 93735_f_at  | D49686   | Psmc3               | proteasome (prosome, macropain) 26S subunit, ATPase 3                                                                                        |
| 93068_r_at  | U62674   | Hist2h3c1           | histone 2, H3c1                                                                                                                              |
| 100465_i_at | AA655823 | Gm1673              | gene model 1673, (NCBI)                                                                                                                      |
| 162455_f_at | AV041013 | 1110039B18Rik       | RIKEN cDNA 1110039B18 gene                                                                                                                   |
| 103881_at   | AA691185 | Ppa2                | pyrophosphatase (inorganic) 2                                                                                                                |
| 161228_f_at | AV260677 | Enah                | Enabled homolog (Drosophila)                                                                                                                 |
| 96155_at    | AW049359 | Cdk5rap3            | CDK5 regulatory subunit associated protein 3                                                                                                 |
| 99062_at    | AI891912 | Pvrl3               | poliovirus receptor-related 3                                                                                                                |
| 100955_at   | AA989957 | Ube2t               | ubiquitin-conjugating enzyme E2T (putative)                                                                                                  |
| 95035_at    | AI467390 | Ipo4                | importin 4                                                                                                                                   |
| 100509_at   | AW121012 | Rnf19               | ring finger protein (C3HC4 type) 19                                                                                                          |
| 99923_at    | AA615429 | Pcf11               | cleavage and polyadenylation factor subunit homolog (S. cerevisiae)                                                                          |
| 94322_at    | D42048   | Sqle                | squalene epoxidase                                                                                                                           |
| 95318_at    | AF045565 | Zfp105              | zinc finger protein 105                                                                                                                      |
| 104477_at   | AW047643 | ---                 | Transcribed locus                                                                                                                            |
| 94299_at    | AI839731 | Dctn2               | dynactin 2                                                                                                                                   |
| 99917_at    | U52951   | Ezh2                | enhancer of zeste homolog 2 (Drosophila)                                                                                                     |
| 104738_at   | D63784   | Dnajc2              | DnaJ (Hsp40) homolog, subfamily C, member 2                                                                                                  |
| 97380_at    | AI197431 | 2700069A02Rik       | RIKEN cDNA 2700069A02 gene                                                                                                                   |
| 94972_at    | AB026569 | Rbms1               | RNA binding motif, single stranded interacting protein 1                                                                                     |
| 98484_at    | U37186   | Ica1                | islet cell autoantigen 1                                                                                                                     |
| 92733_at    | U22058   | Adam4               | a disintegrin and metallopeptidase domain 4                                                                                                  |
| 98101_at    | AI851798 | Gtf2a2              | general transcription factor II A, 2                                                                                                         |
| 96655_g_at  | AI852916 | Wdr48               | WD repeat domain 48                                                                                                                          |
| 96618_at    | AW045637 | Rpp21               | ribonuclease P 21 subunit (human)                                                                                                            |
| 160068_at   | AF075136 | Sap30               | sin3 associated polypeptide                                                                                                                  |
| 102918_at   | M84683   | Muc1                | mucin 1, transmembrane                                                                                                                       |
| 160638_at   | U19596   | Cdkn2c              | cyclin-dependent kinase inhibitor 2C (p18, inhibits CDK4)                                                                                    |
| 161004_at   | AA250414 | 1700097N02Rik       | RIKEN cDNA 1700097N02 gene                                                                                                                   |
| 92797_at    | AI840051 | Cul3                | cullin 3                                                                                                                                     |
| 94562_at    | AI843968 | Gnpat               | glyceronephosphate O-acyltransferase                                                                                                         |
| 100573_f_at | M14220   | Gpi1 /// LOC6765    | glucose phosphate isomerase 1 /// similar to Glucose-6-phosphate isomerase (GPI) (Phosphoglucose isomerase) (PGI) (Phosphohe                 |
| 101057_at   | AW121180 | A430005L14Rik       | RIKEN cDNA A430005L14 gene                                                                                                                   |
| 101439_at   | AW122716 | Arl6                | ADP-ribosylation factor-like 6                                                                                                               |
| 104220_at   | AF010133 | LOC670044           | similar to Mothers against decapentaplegic homolog 6 (SMAD 6) (Mothers against DPP homolog 6) (Smad6) (Mad homolog 7)                        |
| 102937_at   | AA636300 | LOC546257 /// LC    | similar to transcription elongation factor B polypeptide 3 binding protein 1 isoform 1 /// similar to transcription elongation factor B poly |
| 93968_at    | AA870917 | Pdcd5               | programmed cell death 5                                                                                                                      |
| 102821_s_at | L32752   | Ran /// Rasl2-9 /// | RAN, member RAS oncogene family /// RAS-like, family 2, locus 9 /// similar to RAN, member RAS oncogene family /// similar to RAI            |
| 93720_at    | AB005623 | Agpat1              | 1-acylglycerol-3-phosphate O-acyltransferase 1 (lysophosphatidic acid acyltransferase, alpha)                                                |
| 96136_at    | AI553452 | Exosc10             | exosome component 10                                                                                                                         |
| 160200_at   | AA816191 | 3230401D17Rik       | RIKEN cDNA 3230401D17 gene                                                                                                                   |
| 95022_at    | AB020886 | Akap12              | A kinase (PRKA) anchor protein (gravin) 12                                                                                                   |
| 92824_at    | AF051942 | Nme6                | expressed in non-metastatic cells 6, protein                                                                                                 |
| 94516_f_at  | M55181   | Penk1               | preproenkephalin 1                                                                                                                           |
| 96338_at    | AW125059 | Egln2               | EGL nine homolog 2 (C. elegans)                                                                                                              |
| 93062_at    | AW045881 | Mrp139              | mitochondrial ribosomal protein L39                                                                                                          |
| 160620_at   | U83174   | Gt(ROSA)26Sor       | gene trap ROSA 26, Philippe Soriano                                                                                                          |
| 94619_at    | D10171   | Grid1               | glutamate receptor, ionotropic, delta 1                                                                                                      |
| 96746_at    | AW124813 | Dlat                | dihydrolipoamide S-acetyltransferase (E2 component of pyruvate dehydrogenase complex)                                                        |
| 97310_at    | AW124318 | St13                | suppression of tumorigenicity 13                                                                                                             |
| 104368_at   | U51204   | Mapre3              | microtubule-associated protein, RP/EB family, member 3                                                                                       |
| 100592_at   | AI929971 | Ghitm               | growth hormone inducible transmembrane protein                                                                                               |
| 101444_at   | U83176   | Thumpd3             | THUMP domain containing 3                                                                                                                    |
| 97404_at    | AW048244 | 1500034J01Rik       | RIKEN cDNA 1500034J01 gene                                                                                                                   |
| 93094_at    | U88588   | Cdr2                | cerebellar degeneration-related 2                                                                                                            |
| 162153_i_at | AV333522 | Exosc5              | exosome component 5                                                                                                                          |
| 104209_at   | AI847016 | Cyhr1               | cysteine and histidine rich 1                                                                                                                |

|             |          |                  |                                                                                                                                                              |
|-------------|----------|------------------|--------------------------------------------------------------------------------------------------------------------------------------------------------------|
| 161995_r_at | AV328137 | Got2 /// LOC6406 | glutamate oxaloacetate transaminase 2, mitochondrial /// similar to Aspartate aminotransferase, mitochondrial precursor (Transaminase)                       |
| 93191_at    | AW061328 | Vamp4            | vesicle-associated membrane protein 4                                                                                                                        |
| 96054_f_at  | Y17345   | Acp1 /// LOC6195 | acid phosphatase 1, soluble /// similar to acid phosphatase 1, soluble /// similar to acid phosphatase 1, soluble /// similar to acid phosphatase 1, soluble |
| 97441_at    | AI839299 | Acin1            | apoptotic chromatin condensation inducer 1                                                                                                                   |
| 97249_at    | AW124204 | Exosc5           | exosome component 5                                                                                                                                          |
| 103334_at   | AF028242 | Crp              | calcitonin gene-related peptide-receptor component protein                                                                                                   |
| 161814_f_at | AV355427 | Rnf19            | Ring finger protein (C3HC4 type) 19                                                                                                                          |
| 92874_f_at  | AF071316 | Cops7a           | COP9 (constitutive photomorphogenic) homolog, subunit 7a (Arabidopsis thaliana)                                                                              |
| 101976_at   | AF071314 | Cops4            | COP9 (constitutive photomorphogenic) homolog, subunit 4 (Arabidopsis thaliana)                                                                               |
| 161031_at   | AI842128 | Zbtb25           | zinc finger and BTB domain containing 25                                                                                                                     |
| 100513_at   | AF075461 | Ddef1            | development and differentiation enhancing                                                                                                                    |
| 160110_at   | AW124007 | Wwp2             | WW domain containing E3 ubiquitin protein ligase 2                                                                                                           |
| 160562_at   | Z31399   | Cct7             | chaperonin subunit 7 (eta)                                                                                                                                   |
| 93937_at    | U19859   | Gas8             | growth arrest specific 8                                                                                                                                     |
| 103882_at   | AI182588 | Cpn1             | carboxypeptidase N, polypeptide 1                                                                                                                            |
| 96563_at    | AI414051 | Usp24            | ubiquitin specific peptidase 24                                                                                                                              |
| 100115_at   | AW124128 | 2610028H07Rik    | RIKEN cDNA 2610028H07 gene                                                                                                                                   |
| 96952_at    | AW121552 | Psmc6            | proteasome (prosome, macropain) subunit, alpha type 6                                                                                                        |
| 100057_at   | AI838320 | Nsmc1            | non-SMC element 1 homolog (S. cerevisiae)                                                                                                                    |
| 99949_at    | AW060324 | Ccdc95           | coiled-coil domain containing 95                                                                                                                             |
| 161018_at   | AI661590 | 2310010J17Rik    | RIKEN cDNA 2310010J17 gene                                                                                                                                   |
| 161469_r_at | AV354445 | Acads            | acyl-Coenzyme A dehydrogenase, short chain                                                                                                                   |
| 101738_at   | U25145   | Lhb              | luteinizing hormone beta                                                                                                                                     |
| 161139_f_at | AV175719 | Ddef1            | development and differentiation enhancing                                                                                                                    |
| 96793_at    | AI607813 | Dmap1            | DNA methyltransferase 1-associated protein 1                                                                                                                 |
| 99962_at    | D12644   | Kif2a            | Kinesin family member 2A                                                                                                                                     |
| 93743_at    | AI838388 | Hsbp1            | heat shock factor binding protein 1                                                                                                                          |
| 93275_at    | U58885   | Sh3gl1           | SH3-domain GRB2-like 1                                                                                                                                       |
| 96604_at    | AW125827 | Dus1l            | dihydrouridine synthase 1-like (S. cerevisiae)                                                                                                               |
| 94810_at    | X79233   | Ewsr1            | Ewing sarcoma breakpoint region 1                                                                                                                            |
| 104430_at   | AA981582 | Cd96             | CD96 antigen                                                                                                                                                 |
| 100720_at   | X65553   | Pabpc1           | poly A binding protein, cytoplasmic 1                                                                                                                        |
| 94850_at    | AJ238894 | Acot9            | acyl-CoA thioesterase 9                                                                                                                                      |
| 101946_at   | AA840463 | Lypla1           | lysophospholipase 1                                                                                                                                          |
| 99161_at    | AI843359 | Grina            | glutamate receptor, ionotropic, N-methyl D-aspartate-associated protein 1 (glutamate binding)                                                                |
| 104537_at   | AW048828 | 0610042C05Rik    | RIKEN cDNA 0610042C05 gene                                                                                                                                   |
| 102747_at   | M28821   | Tcte1            | t-complex-associated testis expressed 1                                                                                                                      |
| 99041_at    | Y09973   | Taf1b            | TATA box binding protein (Tbp)-associated factor, RNA polymerase I, B                                                                                        |
| 98619_at    | AW121709 | Dtymk            | deoxythymidylate kinase                                                                                                                                      |
| 160862_at   | AF035645 | Ptp4a3           | protein tyrosine phosphatase 4a3                                                                                                                             |
| 95044_at    | AI844549 | Med28            | mediator of RNA polymerase II transcription, subunit 28 homolog (yeast)                                                                                      |
| 104105_at   | AI854665 | Xpo6             | exportin 6                                                                                                                                                   |
| 160212_at   | AW050205 | Ttc4             | tetratricopeptide repeat domain 4                                                                                                                            |
| 101166_at   | X55126   | Zscan2           | zinc finger and SCAN domain containing 2                                                                                                                     |
| 94482_at    | AF012251 | Csnk2a2          | casein kinase II, alpha 2, polypeptide                                                                                                                       |
| 103944_at   | U92068   | Rad51l1          | RAD51-like 1 (S. cerevisiae)                                                                                                                                 |
| 161126_at   | AV357533 | Gm288            | gene model 288, (NCBI)                                                                                                                                       |
| 98604_at    | U79774   | Nnp1             | novel nuclear protein 1                                                                                                                                      |
| 93478_at    | AA612483 | 4930461P20Rik    | RIKEN cDNA 4930461P20 gene                                                                                                                                   |
| 97242_at    | AI849011 | 0610010O12Rik    | RIKEN cDNA 0610010O12 gene                                                                                                                                   |
| 160186_at   | AI847282 | C030004A17Rik    | RIKEN cDNA C030004A17 gene                                                                                                                                   |
| 161439_f_at | AV349844 | Ap1m1            | adaptor-related protein complex AP-1, mu subunit 1                                                                                                           |
| 96656_at    | AI644179 | Wdr48            | WD repeat domain 48                                                                                                                                          |
| 96239_at    | AA815503 | Vrk3             | vaccinia related kinase 3                                                                                                                                    |
| 104688_at   | Y09010   | Map4k1 /// LOC6  | mitogen activated protein kinase kinase kinase kinase 1 /// similar to Mitogen-activated protein kinase kinase kinase kinase 1 (MAPK)                        |
| 94260_at    | AI850352 | Larp1 /// LOC631 | La ribonucleoprotein domain family, member 1 /// similar to la related protein isoform 1                                                                     |
| 102836_at   | U96724   | RP23-136K12.4    | putative phosphatase                                                                                                                                         |
| 161235_f_at | AV265269 | Bat4             | HLA-B associated transcript 4                                                                                                                                |
| 104150_at   | AW121957 | Lrch4            | leucine-rich repeats and calponin homology (CH) domain containing 4                                                                                          |
| 92410_at    | X92410   | Rad23a           | RAD23a homolog (S. cerevisiae)                                                                                                                               |
| 93758_at    | AA823653 | Incenp           | inner centromere protein                                                                                                                                     |
| 103525_at   | AA981725 | Hnrpl            | heterogeneous nuclear ribonucleoprotein L-like                                                                                                               |
| 93441_at    | AI595322 | 2700099C18Rik    | RIKEN cDNA 2700099C18 gene                                                                                                                                   |
| 98924_at    | Y08027   | Art3             | ADP-ribosyltransferase 3                                                                                                                                     |
| 96254_at    | AB028272 | Dnajb1           | DnaJ (Hsp40) homolog, subfamily B, member 1                                                                                                                  |
| 94716_f_at  | M17962   | Klk1b9 /// Klk1  | kallikrein 1-related peptidase b9 /// kallikrein 1 /// kallikrein 1-related peptidase b1 /// kallikrein 1-related peptidase b4 /// RIKEN cDNA                |
| 94253_at    | AW061243 | Eif2s1           | eukaryotic translation initiation factor 2, subunit 1 alpha                                                                                                  |

|             |          |                 |                                                                                                                  |
|-------------|----------|-----------------|------------------------------------------------------------------------------------------------------------------|
| 94313_at    | X96767   | Snrp1c          | U1 small nuclear ribonucleoprotein 1C                                                                            |
| 162327_f_at | AV084684 | Ndufv2          | NADH dehydrogenase (ubiquinone) flavoprotein 2                                                                   |
| 97411_at    | L11316   | Ect2            | ect2 oncogene                                                                                                    |
| 99566_at    | L31777   | Tpi1            | triosephosphate isomerase 1                                                                                      |
| 98490_at    | AA822412 | Arl8b           | ADP-ribosylation factor-like 8B                                                                                  |
| 104041_at   | AW122255 | Zubr1           | zinc finger, UBR1 type 1                                                                                         |
| 160210_at   | AF109377 | 4930539H15Rik   | RIKEN cDNA 4930539H15 gene                                                                                       |
| 95659_at    | AF041476 | Actl6a          | actin-like 6A                                                                                                    |
| 97423_at    | AI839819 | 1500035H01Rik   | RIKEN cDNA 1500035H01 gene                                                                                       |
| 104151_at   | AI553451 | Lrch4           | leucine-rich repeats and calponin homology (CH) domain containing 4                                              |
| 160425_at   | AI156731 | Mterfd1         | MTERF domain containing 1                                                                                        |
| 161227_r_at | AV260411 | ---             | ---                                                                                                              |
| 99630_at    | AW060257 | Mrpl54          | mitochondrial ribosomal protein L54                                                                              |
| 103970_at   | AF116847 | Arid3b          | AT rich interactive domain 3B (Bright like)                                                                      |
| 94899_at    | U73200   | AA536749        | expressed sequence AA536749                                                                                      |
| 160282_at   | AI847490 | 4931406I20Rik   | RIKEN cDNA 4931406I20 gene                                                                                       |
| 93567_at    | AW122536 | Pfn2            | profilin 2                                                                                                       |
| 100899_s_at | AI265210 | Zbtb22          | zinc finger and BTB domain containing 22                                                                         |
| 96545_s_at  | AI447510 | Pcid2           | PCI domain containing 2                                                                                          |
| 94063_at    | X85991   | Sema4a          | sema domain, immunoglobulin domain (Ig), transmembrane domain (TM) and short cytoplasmic domain, (semaphorin) 4A |
| 98892_at    | AI846934 | Lpin1           | lipin 1                                                                                                          |
| 162081_f_at | AV312736 | ---             | ---                                                                                                              |
| 96178_at    | AI850636 | Myst2           | MYST histone acetyltransferase 2                                                                                 |
| 98400_at    | AA896295 | Solt            | SoxLZ/Sox6 leucine zipper binding protein in testis                                                              |
| 161757_f_at | AV298789 | Ranbp5          | RAN binding protein 5                                                                                            |
| 104254_at   | AI839876 | Ralgps2         | Ral GEF with PH domain and SH3 binding motif 2                                                                   |
| 160925_at   | X13664   | Nras            | neuroblastoma ras oncogene                                                                                       |
| 93499_at    | U16740   | Capza1          | capping protein (actin filament) muscle Z-line, alpha 1                                                          |
| 98064_at    | AW125378 | Aamp            | angio-associated migratory protein                                                                               |
| 92375_at    | AW211207 | Ascc1           | activating signal cointegrator 1 complex subunit 1                                                               |
| 94062_at    | AI847609 | Ndufv2          | NADH dehydrogenase (ubiquinone) flavoprotein 2                                                                   |
| 93973_at    | AI854624 | Eif3s9          | eukaryotic translation initiation factor 3, subunit 9 (eta)                                                      |
| 94893_at    | AI840411 | 2610301B20Rik   | RIKEN cDNA 2610301B20 gene                                                                                       |
| 102036_at   | AW046757 | Thap7           | THAP domain containing 7                                                                                         |
| 96068_at    | AI848821 | Impm1l          | IMP1 inner mitochondrial membrane peptidase-like (S. cerevisiae)                                                 |
| 94521_at    | U19597   | Cdkn2d          | cyclin-dependent kinase inhibitor 2D (p19, inhibits CDK4)                                                        |
| 162350_at   | AV173777 | D330001F17Rik   | RIKEN cDNA D330001F17 gene                                                                                       |
| 102215_at   | Y10495   | Ift81           | intraflagellar transport 81 homolog (Chlamydomonas)                                                              |
| 103671_at   | AF061972 | Htatip2         | HIV-1 tat interactive protein 2, homolog (human)                                                                 |
| 100041_at   | AW124133 | D11ErtD333e     | DNA segment, Chr 11, ERATO Doi 333, expressed                                                                    |
| 95539_at    | AA798971 | Rab3ip          | RAB3A interacting protein                                                                                        |
| 94298_at    | X53619   | Tsta3           | tissue specific transplantation antigen P35B                                                                     |
| 95449_at    | AW049793 | Mif4gd          | MIF4G domain containing                                                                                          |
| 93767_i_at  | AW124052 | 2700059D21Rik   | RIKEN cDNA 2700059D21 gene                                                                                       |
| 93805_at    | AW121164 | Ssna1           | Sjogren's syndrome nuclear autoantigen 1                                                                         |
| 160540_at   | AF022223 | Bag1            | Bcl2-associated athanogene 1                                                                                     |
| 93311_at    | AF033565 | Clk3            | CDC-like kinase 3                                                                                                |
| 160672_at   | AI462438 | AI462438        | expressed sequence AI462438                                                                                      |
| 103694_at   | AW125432 | Nup188          | nucleoporin 188                                                                                                  |
| 99986_at    | AF007550 | Gosr2           | golgi SNAP receptor complex member 2                                                                             |
| 160629_at   | AI847399 | Rgs10           | regulator of G-protein signalling 10                                                                             |
| 92759_at    | U43298   | Lamb3           | laminin, beta 3                                                                                                  |
| 93475_at    | AI845581 | Spef1           | sperm flagellar 1                                                                                                |
| 97295_at    | AW122331 | Cdca8           | cell division cycle associated 8                                                                                 |
| 95302_at    | AI854595 | Frap1           | FK506 binding protein 12-rapamycin associated protein 1                                                          |
| 98953_at    | AW048032 | Eif1b           | eukaryotic translation initiation factor 1B                                                                      |
| 98418_at    | U10115   | Dvl1            | dishevelled, dsh homolog 1 (Drosophila)                                                                          |
| 160329_at   | AA798365 | 1110049F12Rik   | RIKEN cDNA 1110049F12 gene                                                                                       |
| 94542_at    | AA929348 | Mbtd1           | mbt domain containing 1                                                                                          |
| 95696_at    | AI840882 | Txn2 /// LOC620 | thioredoxin-like 2 /// similar to thioredoxin-like 2                                                             |
| 104419_at   | AI132380 | Fndc3a          | fibronectin type III domain containing 3a                                                                        |
| 101069_g_at | AA656621 | Mkrr1           | makorin, ring finger protein, 1                                                                                  |
| 97935_at    | AI842970 | 4121402D02Rik   | RIKEN cDNA 4121402D02 gene                                                                                       |
| 98446_s_at  | U06834   | Cct3            | chaperonin subunit 3 (gamma)                                                                                     |
| 101416_f_at | L76155   | Bat4            | HLA-B associated transcript 4                                                                                    |
| 95702_at    | AI461803 | Stt3b           | STT3, subunit of the oligosaccharyltransferase complex, homolog B (S. cerevisiae)                                |
| 103999_at   | AI852034 | 4932416N17Rik   | RIKEN cDNA 4932416N17 gene                                                                                       |

|             |          |                    |                                                                                                                                          |
|-------------|----------|--------------------|------------------------------------------------------------------------------------------------------------------------------------------|
| 99990_at    | U28789   | Rbbp6              | retinoblastoma binding protein 6                                                                                                         |
| 93820_at    | AF037371 | Cox7a2             | cytochrome c oxidase, subunit VIIa 2                                                                                                     |
| 103762_at   | AI853340 | Gtf2f1             | general transcription factor IIF, polypeptide 1                                                                                          |
| 160514_at   | D78255   | Rp9h               | retinitis pigmentosa 9 homolog (human)                                                                                                   |
| 102934_s_at | L16926   | Cdc25c             | cell division cycle 25 homolog C (S. cerevisiae)                                                                                         |
| 160449_at   | AW122207 | Dr1                | down-regulator of transcription 1                                                                                                        |
| 96941_at    | AI854043 | Rab14              | RAB, member of RAS oncogene family-like 4                                                                                                |
| 103330_at   | AI838709 | Strbp              | spermatid perinuclear RNA binding protein                                                                                                |
| 103691_at   | AI592541 | Trim13             | tripartite motif protein 13                                                                                                              |
| 94026_at    | J00612   | Pomc1              | pro-opiomelanocortin-alpha                                                                                                               |
| 98515_at    | AI844392 | Gtf2e2             | general transcription factor II E, polypeptide 2 (beta subunit)                                                                          |
| 102210_at   | AJ003007 | Dtnb               | dystrobrevin, beta                                                                                                                       |
| 95486_at    | AA794134 | Ptdsr              | phosphatidylserine receptor                                                                                                              |
| 104261_at   | AA624493 | Asxl1              | additional sex combs like 1 (Drosophila)                                                                                                 |
| 95401_at    | AW050156 | BC038286           | cDNA sequence BC038286                                                                                                                   |
| 99512_at    | AI852647 | Cnot1 /// LOC620   | CCR4-NOT transcription complex, subunit 1 /// similar to CCR4-NOT transcription complex, subunit 1 isoform a /// similar to CCR4-N       |
| 98904_at    | AW061339 | Mrp135             | mitochondrial ribosomal protein L35                                                                                                      |
| 160265_at   | AW123979 | Eif5               | eukaryotic translation initiation factor 5                                                                                               |
| 97309_at    | AW214164 | St13               | suppression of tumorigenicity 13                                                                                                         |
| 104005_at   | AB019541 | B4galt2            | UDP-Gal:betaGlcNAc beta 1,4- galactosyltransferase, polypeptide 2                                                                        |
| 101011_at   | L25913   | Cct4               | chaperonin subunit 4 (delta)                                                                                                             |
| 98073_at    | U66249   | Cut11              | cut-like 1 (Drosophila)                                                                                                                  |
| 103079_at   | AA982208 | Arid2              | AT rich interactive domain 2 (Arid-rfx like)                                                                                             |
| 95775_f_at  | V00829   | Klk1b1             | kallikrein 1-related peptidase b1                                                                                                        |
| 102683_at   | U76009   | Slc30a3            | solute carrier family 30 (zinc transporter), member 3                                                                                    |
| 94452_g_at  | AI787627 | Nsun2              | NOL1/NOP2/Sun domain family 2                                                                                                            |
| 104122_at   | AW122596 | D330001F17Rik      | RIKEN cDNA D330001F17 gene                                                                                                               |
| 94451_at    | AI787627 | Nsun2              | NOL1/NOP2/Sun domain family 2                                                                                                            |
| 96617_at    | AI844737 | Drap1              | Dr1 associated protein 1 (negative cofactor 2 alpha)                                                                                     |
| 93898_at    | AB024921 | Sgcb               | sarcoglycan, beta (dystrophin-associated glycoprotein)                                                                                   |
| 160084_at   | M12330   | LOC668343 /// LC   | similar to Ornithine decarboxylase (ODC) /// similar to Ornithine decarboxylase (ODC)                                                    |
| 94524_at    | AW123469 | Dap3               | death associated protein 3                                                                                                               |
| 160869_at   | AI849490 | Sirt3              | sirtuin 3 (silent mating type information regulation 2, homolog) 3 (S. cerevisiae)                                                       |
| 101519_at   | M29264   | Srp14              | signal recognition particle 14                                                                                                           |
| 100061_f_at | M13500   | Klk1               | kallikrein 1                                                                                                                             |
| 93676_at    | U93583   | Rad51ap1           | RAD51 associated protein 1                                                                                                               |
| 102113_f_at | AI324061 | Tsta3              | tissue specific transplantation antigen P35B                                                                                             |
| 97527_at    | AA681998 | Cks2               | CDC28 protein kinase regulatory subunit 2                                                                                                |
| 94217_f_at  | AC002397 | Cdca3              | cell division cycle associated 3                                                                                                         |
| 100954_at   | AF057287 | Hrb                | HIV-1 Rev binding protein                                                                                                                |
| 92630_r_at  | D63707   | Hdgf               | hepatoma-derived growth factor                                                                                                           |
| 160461_f_at | AW215736 | Tubb6              | tubulin, beta 6                                                                                                                          |
| 96711_at    | AI849191 | Znrd1              | zinc ribbon domain containing, 1                                                                                                         |
| 94438_at    | AI852672 | Pfkf               | phosphofructokinase, muscle                                                                                                              |
| 160945_at   | AI597025 | C80008             | expressed sequence C80008                                                                                                                |
| 95033_at    | AW049513 | Jmjd1a             | jumonji domain containing 1A                                                                                                             |
| 160188_at   | AI854103 | Nudt4              | nudix (nucleoside diphosphate linked moiety X)-type motif 4                                                                              |
| 103814_at   | AF093671 | Pex11b             | peroxisomal biogenesis factor 11b                                                                                                        |
| 94815_at    | X13586   | Bpgm               | 2,3-bisphosphoglycerate mutase                                                                                                           |
| 97364_at    | AW213865 | Asf1b              | ASF1 anti-silencing function 1 homolog B (S. cerevisiae)                                                                                 |
| 100413_at   | AB033168 | Ylpm1              | YLP motif containing 1                                                                                                                   |
| 95058_f_at  | AW121984 | Brp44              | brain protein 44                                                                                                                         |
| 93588_at    | Z54179   | Gtl3               | gene trap locus 3                                                                                                                        |
| 93087_r_at  | AA267185 | Usp25              | ubiquitin specific peptidase 25                                                                                                          |
| 93067_f_at  | U62674   | Hist2h3c1 /// Hist | histone 2, H3c1 /// histone 2, H2aa1 /// histone 2, H2aa2 /// similar to H2A histone family, member O /// similar to H2A histone family, |
| 160451_at   | D87691   | Etf1               | eukaryotic translation termination factor 1                                                                                              |
| 160171_f_at | AI854821 | Acot9              | acyl-CoA thioesterase 9                                                                                                                  |
| 95628_at    | AF094519 | Diap3              | diaphanous homolog 3 (Drosophila)                                                                                                        |
| 99439_at    | X67735   | Mas1               | MAS1 oncogene                                                                                                                            |
| 93257_at    | AW048287 | Ddx1               | DEAD (Asp-Glu-Ala-Asp) box polypeptide 1                                                                                                 |
| 98522_at    | AI839158 | Psm8               | proteasome (prosome, macropain) 26S subunit, non-ATPase, 8                                                                               |
| 94064_at    | U05343   | Zfp91              | zinc finger protein 91                                                                                                                   |
| 104711_at   | AW122109 | Vps4a              | vacuolar protein sorting 4a (yeast)                                                                                                      |
| 102943_at   | AI099344 | Atg7               | autophagy-related 7 (yeast)                                                                                                              |
| 98339_at    | AB026808 | Syt11              | synaptotagmin XI                                                                                                                         |
| 93589_at    | AI851172 | Entpd4             | ectonucleoside triphosphate diphosphohydrolase 4                                                                                         |
| 94312_at    | AI180784 | 2210010A19Rik      | RIKEN cDNA 2210010A19 gene                                                                                                               |

|             |          |                  |                                                                                                                                                              |
|-------------|----------|------------------|--------------------------------------------------------------------------------------------------------------------------------------------------------------|
| 100353_g_at | AA919208 | Hspa4            | heat shock protein 4                                                                                                                                         |
| 93356_at    | D26091   | Mcm7             | minichromosome maintenance deficient 7 (S. cerevisiae)                                                                                                       |
| 102835_at   | X14972   | Ap2a2            | adaptor protein complex AP-2, alpha 2 subunit                                                                                                                |
| 160163_at   | AI843518 | 2210010A19Rik    | RIKEN cDNA 2210010A19 gene                                                                                                                                   |
| 103608_at   | AI842636 | Fars2            | phenylalanine-tRNA synthetase 2 (mitochondrial)                                                                                                              |
| 102895_at   | AI153246 | Nipbl            | Nipped-B homolog (Drosophila)                                                                                                                                |
| 103871_at   | AW123729 | Sec23ip          | Sec23 interacting protein                                                                                                                                    |
| 92788_f_at  | Y12474   | Cetn3            | centrin 3                                                                                                                                                    |
| 92863_at    | U40826   | Wbp2             | WW domain binding protein 2                                                                                                                                  |
| 103309_at   | AI853977 | Frap1            | FK506 binding protein 12-rapamycin associated protein 1                                                                                                      |
| 93173_at    | AI845814 | Slc39a3          | solute carrier family 39 (zinc transporter), member 3                                                                                                        |
| 96779_f_at  | AI846315 | 2410022L05Rik    | RIKEN cDNA 2410022L05 gene                                                                                                                                   |
| 160448_at   | AI646750 | Pcd2l            | programmed cell death 2-like                                                                                                                                 |
| 162299_f_at | AV029120 | Pebp1            | phosphatidylethanolamine binding protein 1                                                                                                                   |
| 95924_at    | AA473729 | 1700012B15Rik    | RIKEN cDNA 1700012B15 gene                                                                                                                                   |
| 160167_at   | AW121948 | Nup62            | nucleoporin 62                                                                                                                                               |
| 160936_at   | AA763937 | Tram1            | translocating chain-associating membrane protein 1                                                                                                           |
| 98153_at    | L20509   | Cct3             | chaperonin subunit 3 (gamma)                                                                                                                                 |
| 98834_at    | X75427   | Itpa2            | integrin alpha 2                                                                                                                                             |
| 97651_at    | AB027563 | Polk             | polymerase (DNA directed), kappa                                                                                                                             |
| 101254_at   | L32751   | Ran /// LOC62501 | RAN, member RAS oncogene family /// similar to RAN, member RAS oncogene family /// similar to RAN, member RAS oncogene family                                |
| 94450_at    | AI854202 | Nsun2            | NOL1/NOP2/Sun domain family 2                                                                                                                                |
| 94363_at    | AI840815 | Bms1l            | BMS1-like, ribosome assembly protein (yeast)                                                                                                                 |
| 95564_at    | AI117859 | BC018601         | cDNA sequence BC018601                                                                                                                                       |
| 97343_at    | AI852735 | Bcdin3           | bin3, bicoid-interacting 3, homolog (Drosophila)                                                                                                             |
| 102891_at   | D86527   | Wrn              | Werner syndrome homolog (human)                                                                                                                              |
| 98929_at    | AI846452 | Mrps36           | mitochondrial ribosomal protein S36                                                                                                                          |
| 95497_at    | AI843880 | Tipin            | timeless interacting protein                                                                                                                                 |
| 95282_at    | J04633   | Hsp90aa1         | heat shock protein 90kDa alpha (cytosolic), class A member 1                                                                                                 |
| 160113_at   | AI854472 | Brap             | BRCA1 associated protein                                                                                                                                     |
| 95034_f_at  | AW212243 | Ipo4             | importin 4                                                                                                                                                   |
| 96322_at    | AI836001 | Edf1             | endothelial differentiation-related factor 1                                                                                                                 |
| 96676_at    | AW121875 | Chchd7           | coiled-coil-helix-coiled-coil-helix domain containing 7                                                                                                      |
| 102964_at   | AW122326 | Zfp639           | zinc finger protein 639                                                                                                                                      |
| 101412_at   | U58887   | Sh3gl3           | SH3-domain GRB2-like 3                                                                                                                                       |
| 101697_f_at | AI844607 | ---              | ---                                                                                                                                                          |
| 96021_at    | AI854264 | Hbld1            | HESB like domain containing 1                                                                                                                                |
| 103628_at   | D16503   | ---              | ---                                                                                                                                                          |
| 102201_s_at | L42177   | Psen1            | presenilin 1                                                                                                                                                 |
| 98146_at    | AW120775 | Nup88            | nucleoporin 88                                                                                                                                               |
| 102911_at   | U89652   | Brca2            | breast cancer 2                                                                                                                                              |
| 104310_at   | AW122159 | G6pc3            | glucose 6 phosphatase, catalytic, 3                                                                                                                          |
| 102343_at   | AF110520 | Cd320            | CD320 antigen                                                                                                                                                |
| 104722_at   | AW121342 | Lmbr1l           | limb region 1 like                                                                                                                                           |
| 103414_at   | AF049850 | Skiv2l           | superkiller viralicidic activity 2-like (S. cerevisiae)                                                                                                      |
| 93071_at    | X99644   | Trim28           | tripartite motif protein 28                                                                                                                                  |
| 160348_at   | AW120787 | Ranbp3           | RAN binding protein 3                                                                                                                                        |
| 95512_at    | M60320   | Pcmt1            | protein-L-isoaspartate (D-aspartate) O-methyltransferase 1                                                                                                   |
| 97447_at    | AI836718 | Map1lc3a         | microtubule-associated protein 1 light chain 3 alpha                                                                                                         |
| 95701_at    | AW124069 | Cxxc5            | CXXC finger 5                                                                                                                                                |
| 98039_at    | AI853819 | 2410015M20Rik    | RIKEN cDNA 2410015M20 gene                                                                                                                                   |
| 100113_s_at | D50367   | Kifap3           | kinesin-associated protein 3                                                                                                                                 |
| 99920_at    | U65586   | Terf1            | telomeric repeat binding factor 1                                                                                                                            |
| 160964_at   | AI838494 | D16Bwg1494e      | DNA segment, Chr 16, Brigham & Women's Genetics 1494 expressed                                                                                               |
| 104069_at   | AI852737 | Spats2           | spermatogenesis associated, serine-rich 2                                                                                                                    |
| 94942_at    | AI854108 | Cstf1            | cleavage stimulation factor, 3' pre-RNA, subunit 1                                                                                                           |
| 103354_at   | Z46966   | Mrps31           | mitochondrial ribosomal protein S31                                                                                                                          |
| 95752_at    | AI837369 | Sbds             | Shwachman-Bodian-Diamond syndrome homolog (human)                                                                                                            |
| 104349_at   | AA870301 | Snip1            | Smad nuclear interacting protein 1                                                                                                                           |
| 102103_f_at | AI482454 | Txn12            | thioredoxin-like 2                                                                                                                                           |
| 96053_i_at  | Y17345   | Acp1 /// LOC6195 | acid phosphatase 1, soluble /// similar to acid phosphatase 1, soluble /// similar to acid phosphatase 1, soluble /// similar to acid phosphatase 1, soluble |
| 97490_at    | AJ011145 | Bcl7b            | B-cell CLL/lymphoma 7B                                                                                                                                       |
| 93846_at    | AF030522 | Snn              | stannin                                                                                                                                                      |
| 101989_at   | AW125380 | Uqcrc1           | ubiquinol-cytochrome c reductase core protein 1                                                                                                              |
| 96869_at    | AW124839 | Gabarap          | gamma-aminobutyric acid receptor associated protein                                                                                                          |
| 161292_f_at | AV305987 | Plk1             | polo-like kinase 1 (Drosophila)                                                                                                                              |
| 101936_at   | AF033566 | Clk4             | CDC like kinase 4                                                                                                                                            |

|             |          |                 |                                                                                        |
|-------------|----------|-----------------|----------------------------------------------------------------------------------------|
| 101096_s_at | AF023482 | Hax1            | HCLS1 associated X-1                                                                   |
| 102317_at   | AF061516 | Vamp4           | vesicle-associated membrane protein 4                                                  |
| 95159_at    | AI846849 | Mrps18b         | mitochondrial ribosomal protein S18B                                                   |
| 103710_at   | AI037032 | MGC107415       | hypothetical protein LOC383216                                                         |
| 97104_g_at  | AF031380 | Rfk             | riboflavin kinase                                                                      |
| 94021_at    | AW048336 | Trim11          | tripartite motif protein 11                                                            |
| 96208_at    | AW123514 | Grif1           | glucocorticoid receptor DNA binding factor 1                                           |
| 95658_at    | AW061085 | Comm1           | COMM domain containing 1                                                               |
| 95715_at    | AW125739 | Eif3s12         | eukaryotic translation initiation factor 3, subunit 12                                 |
| 103387_at   | AB011550 | Phf1            | PHD finger protein 1                                                                   |
| 94757_at    | M60493   | Cfr             | cystic fibrosis transmembrane conductance regulator homolog                            |
| 104095_at   | AI843152 | AU040320        | expressed sequence AU040320                                                            |
| 103965_at   | AI837032 | Entpd6          | ectonucleoside triphosphate diphosphohydrolase 6                                       |
| 160292_at   | AW123987 | Ecgf1           | endothelial cell growth factor 1 (platelet-derived)                                    |
| 96951_at    | AI839795 | Atp6v1d         | ATPase, H+ transporting, lysosomal V1 subunit D                                        |
| 98110_at    | AI853375 | Mdm2            | transformed mouse 3T3 cell double minute 2                                             |
| 160462_f_at | AW050256 | Tubb3           | tubulin, beta 3                                                                        |
| 96883_at    | U70733   | Eif3s4          | eukaryotic translation initiation factor 3, subunit 4 (delta)                          |
| 160129_at   | AI839632 | Eef1d           | eukaryotic translation elongation factor 1 delta (guanine nucleotide exchange protein) |
| 102427_at   | AI849991 | Fytd1           | forty-two-three domain containing 1                                                    |
| 97477_at    | AW124594 | Timm8b          | translocase of inner mitochondrial membrane 8 homolog b (yeast)                        |
| 160285_at   | AI848996 | Dhx40           | DEAH (Asp-Glu-Ala-His) box polypeptide 40                                              |
| 102691_at   | AI848518 | Zfp385          | zinc finger protein 385                                                                |
| 96298_f_at  | AF020185 | Dynl1           | dynein light chain LC8-type 1                                                          |
| 94300_f_at  | AI839497 | Dctn2           | dynactin 2                                                                             |
| 95081_at    | AI840176 | Exosc8          | exosome component 8                                                                    |
| 96847_at    | AI845393 | Vps28           | vacuolar protein sorting 28 (yeast)                                                    |
| 98979_at    | U35249   | Mnat1           | menage a trois 1                                                                       |
| 100470_at   | L35236   | Mapk10          | mitogen activated protein kinase 10                                                    |
| 95549_at    | D13545   | Prim2           | DNA primase, p58 subunit                                                               |
| 101402_at   | AI854510 | Thrap4          | thyroid hormone receptor associated protein 4                                          |
| 94484_at    | AW227778 | Hbs1l           | Hbs1-like (S. cerevisiae)                                                              |
| 98057_at    | AW121162 | Rnf166          | ring finger protein 166                                                                |
| 104713_at   | AA863717 | Prpf38a         | PRP38 pre-mRNA processing factor 38 (yeast) domain containing A                        |
| 96167_at    | AI643420 | Bag3            | Bcl2-associated athanogene 3                                                           |
| 96637_at    | U33005   | Tbc1d1          | TBC1 domain family, member 1                                                           |
| 98141_at    | AA647048 | Eif5b           | eukaryotic translation initiation factor 5B                                            |
| 102796_at   | U64450   | Npm3 /// Npm3-p | nucleoplasmin 3 /// nucleoplasmin 3, pseudogene 1 /// similar to Nucleoplasmin-3       |
| 95573_at    | AW122821 | Baz2a           | bromodomain adjacent to zinc finger domain, 2A                                         |
| 98599_at    | D63850   | Hdgfrp2         | hepatoma-derived growth factor, related protein 2                                      |
| 103418_at   | AW122092 | Rfc4            | replication factor C (activator 1) 4                                                   |
| 103386_at   | AW046123 | Acot8           | acyl-CoA thioesterase 8                                                                |
| 103063_at   | Z67747   | Zfp62           | zinc finger protein 62                                                                 |
| 96157_at    | AI839059 | Zfp91           | zinc finger protein 91                                                                 |
| 101173_at   | Z50024   | Pctp            | phosphatidylcholine transfer protein                                                   |
| 99113_at    | AF071313 | Cops3           | COP9 (constitutive photomorphogenic) homolog, subunit 3 (Arabidopsis thaliana)         |
| 99622_at    | U20344   | Klf4            | Kruppel-like factor 4 (gut)                                                            |
| 160075_at   | AF069988 | Nit1            | nitrilase 1                                                                            |
| 161060_i_at | AV338120 | Ddx51           | DEAD (Asp-Glu-Ala-Asp) box polypeptide 51                                              |
| 95148_at    | AB020202 | Ak2             | adenylate kinase 2                                                                     |
| 102047_at   | AF043326 | Nmt1            | N-myristoyltransferase 1                                                               |
| 160814_at   | AI854547 | Thap4           | THAP domain containing 4                                                               |
| 101221_at   | C76746   | Rab3il1         | RAB3A interacting protein (rabin3)-like 1                                              |
| 162332_f_at | AV091649 | Mapre3          | microtubule-associated protein, RP/EB family, member 3                                 |
| 103913_at   | AI851315 | Sec61a2         | Sec61, alpha subunit 2 (S. cerevisiae)                                                 |
| 98909_at    | AW060843 | Lias            | lipoic acid synthetase                                                                 |
| 101448_at   | D50050   | Hgs             | HGF-regulated tyrosine kinase substrate                                                |
| 96822_at    | AA734428 | Eif2b5          | eukaryotic translation initiation factor 2B, subunit 5 epsilon                         |
| 160736_at   | AA690230 | 4932432N11Rik   | RIKEN cDNA 4932432N11 gene                                                             |
| 104168_at   | AA791742 | Actr2           | ARP2 actin-related protein 2 homolog (yeast)                                           |
| 94872_at    | Y08135   | Smpd3a          | sphingomyelin phosphodiesterase, acid-like 3A                                          |
| 92549_at    | U97170   | Pki3            | protein kinase inhibitor, gamma                                                        |
| 96269_at    | AA716963 | Idi1            | isopentenyl-diphosphate delta isomerase                                                |
| 103032_at   | AF038008 | Tpst1           | protein-tyrosine sulfotransferase 1                                                    |
| 95046_s_at  | M98036   | Eif2b4          | eukaryotic translation initiation factor 2B, subunit 4 delta                           |
| 95140_at    | AI842068 | 5230400G24Rik   | RIKEN cDNA 5230400G24 gene                                                             |
| 160769_at   | AW120606 | Der12           | Der1-like domain family, member 2                                                      |

|             |          |               |                                                                           |
|-------------|----------|---------------|---------------------------------------------------------------------------|
| 94352_at    | AI850675 | Mbt1          | mbt domain containing 1                                                   |
| 96850_at    | AI853642 | Eif4g3        | eukaryotic translation initiation factor 4 gamma, 3                       |
| 98142_at    | AA930290 | Eif5b         | eukaryotic translation initiation factor 5B                               |
| 93057_at    | AW122989 | Btf3          | basic transcription factor 3                                              |
| 99594_at    | AI844598 | Mrpl51        | mitochondrial ribosomal protein L51                                       |
| 96716_at    | AW121102 | 1110003E01Rik | RIKEN cDNA 1110003E01 gene                                                |
| 100559_at   | AI853344 | Dhx16         | DEAH (Asp-Glu-Ala-His) box polypeptide 16                                 |
| 99009_at    | Z49204   | Nnt           | nicotinamide nucleotide transhydrogenase                                  |
| 160800_at   | AA981257 | Zranb1        | zinc finger, RAN-binding domain containing 1                              |
| 98544_at    | U53514   | Guk1          | guanylate kinase 1                                                        |
| 97966_at    | AI848209 | Ncoa5         | nuclear receptor coactivator 5                                            |
| 161745_f_at | AV319225 | Hspa4         | heat shock protein 4                                                      |
| 92629_f_at  | D63707   | Hdgf          | hepatoma-derived growth factor                                            |
| 160196_at   | AI843662 | Smap1         | stromal membrane-associated protein 1                                     |
| 92571_at    | D85904   | Hspa4         | heat shock protein 4                                                      |
| 97333_at    | AW121185 | Dync1h1       | dynein cytoplasmic 1 heavy chain 1                                        |
| 103670_at   | L06463   | Cyp2a12       | cytochrome P450, family 2, subfamily a, polypeptide 12                    |
| 103823_at   | AB013603 | Top3b         | topoisomerase (DNA) III beta                                              |
| 96691_at    | AI845542 | Taf11         | TAF11 RNA polymerase II, TATA box binding protein (TBP)-associated factor |
| 97900_at    | AI845714 | Txndc9        | thioredoxin domain containing 9                                           |
| 93581_at    | AI845121 | Ndufb8        | NADH dehydrogenase (ubiquinone) 1 beta subcomplex 8                       |
| 95653_at    | AI841323 | Mrpl37        | mitochondrial ribosomal protein L37                                       |
| 94550_at    | AW121324 | Snx1          | sorting nexin 1                                                           |
| 102060_at   | AF051357 | Golga4        | golgi autoantigen, golgin subfamily a, 4                                  |
| 97103_at    | AF031380 | Rfk           | riboflavin kinase                                                         |
| 102194_at   | AW122332 | 2810432D09Rik | RIKEN cDNA 2810432D09 gene                                                |
| 102003_at   | AI842159 | Gbf1          | golgi-specific brefeldin A-resistance factor 1                            |
| 103508_at   | AA919750 | Pcgf5         | polycomb group ring finger 5                                              |
| 97307_f_at  | AI842808 | Ndufb5        | NADH dehydrogenase (ubiquinone) 1 beta subcomplex, 5                      |
| 96943_at    | AW125234 | Gps1          | G protein pathway suppressor 1                                            |
| 103878_at   | AF103809 | Ap3b1         | adaptor-related protein complex 3, beta 1 subunit                         |
| 96557_at    | AB010833 | Ptch2         | patched homolog 2                                                         |
| 103815_at   | AI852311 | Pex11b        | peroxisomal biogenesis factor 11b                                         |
| 94506_at    | AI853113 | Nudt21        | nudix (nucleoside diphosphate linked moiety X)-type motif 21              |
| 94005_at    | AI157548 | Pmpcb         | peptidase (mitochondrial processing) beta                                 |
| 98121_at    | D49744   | Fnta          | farnesyltransferase, CAAX box, alpha                                      |
| 98841_at    | M65287   | Acvr2a        | activin receptor IIA                                                      |
| 103914_at   | AI847114 | Pcyt2         | phosphate cytidylyltransferase 2, ethanolamine                            |
| 160165_at   | AI850365 | Ube2m         | ubiquitin-conjugating enzyme E2M (UBC12 homolog, yeast)                   |
| 160621_at   | AI852322 | Mrps22        | mitochondrial ribosomal protein S22                                       |
| 94472_at    | AW123216 | Spcs1         | signal peptidase complex subunit 1 homolog (S. cerevisiae)                |
| 93495_at    | U96746   | Prdx4         | peroxiredoxin 4                                                           |
| 97909_at    | AI838080 | Stmn1         | stathmin 1                                                                |
| 98066_r_at  | AL009226 | Brd2          | bromodomain containing 2                                                  |
| 93740_at    | U33196   | Ybx1          | Y box protein 1                                                           |
| 100138_f_at | X52102   | Rbm14         | RNA binding motif protein 14                                              |
| 101079_at   | AF093140 | Nxf1          | nuclear RNA export factor 1 homolog (S. cerevisiae)                       |
| 101954_at   | U70494   | H2afz         | H2A histone family, member Z                                              |
| 96335_at    | AI181308 | Mrpl38        | mitochondrial ribosomal protein L38                                       |
| 92554_at    | AF059735 | Ctbp2         | C-terminal binding protein 2                                              |
| 95139_at    | AW122075 | Wipi2         | WD repeat domain, phosphoinositide interacting 2                          |
| 99038_at    | L24554   | Adss          | adenylosuccinate synthetase, non muscle                                   |
| 103388_at   | AW047050 | P42pop        | Myb protein P42POP                                                        |
| 94806_at    | AW125336 | Pdhh          | pyruvate dehydrogenase (lipoamide) beta                                   |
| 103030_at   | L31397   | Dnm1          | dynamitin 1                                                               |
| 99988_at    | AW122115 | Dym           | dymeclin                                                                  |
| 100578_at   | M33934   | Impdh2        | inosine 5'-phosphate dehydrogenase 2                                      |
| 98084_at    | AI849834 | Arl2bp        | ADP-ribosylation factor-like 2 binding protein                            |
| 103565_at   | AI843358 | 1810009A15Rik | RIKEN cDNA 1810009A15 gene                                                |
| 96176_at    | AI847916 | Arih2         | ariadne homolog 2 (Drosophila)                                            |
| 160556_at   | AW048976 | 1810020G14Rik | RIKEN cDNA 1810020G14 gene                                                |
| 98033_at    | AA710132 | 1100001H23Rik | RIKEN cDNA 1100001H23 gene                                                |
| 101435_at   | AF033275 | Akap2         | A kinase (PRKA) anchor protein 2                                          |
| 161966_f_at | AV369013 | Entpd6        | ectonucleoside triphosphate diphosphohydrolase 6                          |
| 94348_f_at  | AW124044 | Pcm1          | protein-L-isoaspartate (D-aspartate) O-methyltransferase 1                |
| 101357_at   | X14971   | Ap2a1         | adaptor protein complex AP-2, alpha 1 subunit                             |
| 97201_s_at  | AA823381 | Ndufa5        | NADH dehydrogenase (ubiquinone) 1 alpha subcomplex, 5                     |

|             |          |                       |                                                                                                                                          |
|-------------|----------|-----------------------|------------------------------------------------------------------------------------------------------------------------------------------|
| 93177_at    | AW121661 | ---                   | Transcribed locus                                                                                                                        |
| 104740_at   | AW125318 | Tada1l                | transcriptional adaptor 1 (HF11 homolog, yeast) like                                                                                     |
| 93190_at    | AW209179 | BC053401              | cDNA sequence BC053401                                                                                                                   |
| 96321_at    | AI846396 | Ndufa9                | NADH dehydrogenase (ubiquinone) 1 alpha subcomplex, 9                                                                                    |
| 101490_at   | AW122692 | Hbld2                 | HESB like domain containing 2                                                                                                            |
| 99579_at    | U59761   | Atp1b3                | ATPase, Na <sup>+</sup> /K <sup>+</sup> transporting, beta 3 polypeptide                                                                 |
| 96268_at    | AI840979 | Suc1g1                | succinate-CoA ligase, GDP-forming, alpha subunit                                                                                         |
| 104715_at   | AI152779 | Ubap2                 | ubiquitin-associated protein 2                                                                                                           |
| 95622_at    | AW123907 | Klhdc2                | kelch domain containing 2                                                                                                                |
| 93844_at    | AW061302 | Uqcqr                 | ubiquinol-cytochrome c reductase, complex III subunit VII                                                                                |
| 104258_at   | AA881576 | Acyp2                 | acylphosphatase 2, muscle type                                                                                                           |
| 103393_at   | AA738776 | Pspc1                 | paraspeckle protein 1                                                                                                                    |
| 98563_f_at  | AF015309 | Mcrs1 /// LOC433      | microspherule protein 1 /// similar to Microspherule protein 1 (58 kDa microspherule protein) /// similar to Microspherule protein 1 (58 |
| 93008_at    | AW120557 | Lsm4                  | LSM4 homolog, U6 small nuclear RNA associated (S. cerevisiae)                                                                            |
| 94918_at    | AI839392 | Aars                  | alanyl-tRNA synthetase                                                                                                                   |
| 93293_at    | M27844   | Calm2                 | calmodulin 2                                                                                                                             |
| 94837_at    | U67328   | Eif3s8                | eukaryotic translation initiation factor 3, subunit 8                                                                                    |
| 103712_at   | AW124735 | R3hdm1                | R3H domain 1 (binds single-stranded nucleic acids)                                                                                       |
| 93762_at    | AI841493 | Ppp2r4                | protein phosphatase 2A, regulatory subunit B (PR 53)                                                                                     |
| 93238_at    | AI846822 | Dhrsx                 | dehydrogenase/reductase (SDR family) X chromosome                                                                                        |
| 103416_at   | AI844810 | Mapk6                 | mitogen-activated protein kinase 6                                                                                                       |
| 94420_f_at  | AB000777 | Cry1                  | cryptochrome 1 (photolyase-like)                                                                                                         |
| 100466_f_at | AA655823 | Gm1673                | gene model 1673, (NCBI)                                                                                                                  |
| 95049_at    | AI837853 | Snrpd2                | small nuclear ribonucleoprotein D2                                                                                                       |
| 100628_at   | AI840263 | Ndufc1                | NADH dehydrogenase (ubiquinone) 1, subcomplex unknown, 1                                                                                 |
| 96183_at    | AW122985 | Foxp1                 | forkhead box P1                                                                                                                          |
| 96522_at    | M19381   | Calm1                 | calmodulin 1                                                                                                                             |
| 101065_at   | X57800   | Pcna                  | proliferating cell nuclear antigen                                                                                                       |
| 95502_at    | AI840267 | Sirt2                 | sirtuin 2 (silent mating type information regulation 2, homolog) 2 (S. cerevisiae)                                                       |
| 95438_at    | AI846783 | Rhot1                 | ras homolog gene family, member T1                                                                                                       |
| 104348_at   | AI835152 | Bre                   | brain and reproductive organ-expressed protein                                                                                           |
| 101385_at   | AW047312 | Mbd3                  | methyl-CpG binding domain protein 3                                                                                                      |
| 103910_at   | AJ249987 | Taf10                 | TAF10 RNA polymerase II, TATA box binding protein (TBP)-associated factor                                                                |
| 96359_at    | AI836554 | Hdlbp                 | high density lipoprotein (HDL) binding protein                                                                                           |
| 95910_f_at  | AI844780 | Rbed1                 | RNA binding motif and ELMO domain 1                                                                                                      |
| 95437_at    | AI836139 | Rfwd2                 | ring finger and WD repeat domain 2                                                                                                       |
| 95646_at    | U01170   | Cpt2                  | carnitine palmitoyltransferase 2                                                                                                         |
| 160775_at   | AI848591 | Tulp4                 | tubby like protein 4                                                                                                                     |
| 98887_at    | AW125607 | Napa                  | N-ethylmaleimide sensitive fusion protein attachment protein alpha                                                                       |
| 100894_at   | AJ007360 | Orc5l                 | origin recognition complex, subunit 5-like (S. cerevisiae)                                                                               |
| 98810_at    | X69867   | Htr5b                 | 5-hydroxytryptamine (serotonin) receptor 5B                                                                                              |
| 97263_s_at  | AI846289 | Csnk1d                | casein kinase 1, delta                                                                                                                   |
| 162033_f_at | AV258758 | D2Wsu81e              | DNA segment, Chr 2, Wayne State University 81, expressed                                                                                 |
| 93272_at    | AF062076 | Stk16                 | serine/threonine kinase 16                                                                                                               |
| 98061_at    | AI841192 | Nudt16l1              | nudix (nucleoside diphosphate linked moiety X)-type motif 16-like 1                                                                      |
| 93842_at    | AI196645 | Dap                   | death-associated protein                                                                                                                 |
| 99166_at    | AI845963 | 0610012G03Rik         | RIKEN cDNA 0610012G03 gene                                                                                                               |
| 101854_r_at | AI844178 | ---                   | ---                                                                                                                                      |
| 103098_at   | AW045765 | Baiap2                | brain-specific angiogenesis inhibitor 1-associated protein 2                                                                             |
| 100360_f_at | X02466   | Igh-4 /// Igh-6 /// I | immunoglobulin heavy chain 4 (serum IgG1) /// immunoglobulin heavy chain 6 (heavy chain of IgM) /// immunoglobulin heavy chain (         |
| 93423_at    | AI844772 | Ldoc1l                | leucine zipper, down-regulated in cancer 1-like                                                                                          |
| 160402_at   | AA795613 | Tceb2                 | transcription elongation factor B (SIII), polypeptide 2                                                                                  |
| 104559_at   | AI848162 | BC003940              | cDNA sequence BC003940                                                                                                                   |
| 92578_at    | U10118   | Scye1                 | small inducible cytokine subfamily E, member 1                                                                                           |
| 96959_at    | AW210080 | Ube2n                 | ubiquitin-conjugating enzyme E2N                                                                                                         |
| 93295_at    | Z31555   | Cct5                  | chaperonin subunit 5 (epsilon)                                                                                                           |
| 100574_f_at | L09104   | Gpi1                  | glucose phosphate isomerase 1                                                                                                            |
| 98149_s_at  | AW046496 | 1110033J19Rik         | RIKEN cDNA 1110033J19 gene                                                                                                               |
| 93680_at    | D89728   | Stk10                 | serine/threonine kinase 10                                                                                                               |
| 160256_at   | AA611709 | Tomm7                 | translocase of outer mitochondrial membrane 7 homolog (yeast)                                                                            |
| 94040_at    | D73368   | Erh                   | enhancer of rudimentary homolog (Drosophila)                                                                                             |
| 94545_at    | AW123115 | Rtn1                  | reticulon 1                                                                                                                              |
| 101908_s_at | AF101164 | Ceacam1 /// Ceac      | CEA-related cell adhesion molecule 1 /// CEA-related cell adhesion molecule 2                                                            |
| 93501_f_at  | AF058955 | Sucia2                | succinate-Coenzyme A ligase, ADP-forming, beta subunit                                                                                   |
| 92628_at    | X75895   | LOC622534             | similar to ribosomal protein L36                                                                                                         |
| 97462_at    | AI847584 | Zfp706                | zinc finger protein 706                                                                                                                  |
| 100521_at   | D32137   | Ovpg1                 | oviductal glycoprotein 1                                                                                                                 |

|             |          |                  |                                                                                                                                            |
|-------------|----------|------------------|--------------------------------------------------------------------------------------------------------------------------------------------|
| 97412_at    | AI843157 | 3300001G02Rik    | RIKEN cDNA 3300001G02 gene                                                                                                                 |
| 99574_at    | AI850887 | Znrf2            | zinc and ring finger 2                                                                                                                     |
| 160682_at   | AI851770 | C330011F01Rik    | RIKEN cDNA C330011F01 gene /// RIKEN cDNA 6430706D22 gene                                                                                  |
| 92967_r_at  | AI326288 | Chrme            | cholinergic receptor, nicotinic, epsilon polypeptide                                                                                       |
| 97273_at    | AI845953 | Ars2             | arsenate resistance protein 2                                                                                                              |
| 160299_at   | AA879590 | Rwdd1            | RWD domain containing 1                                                                                                                    |
| 104208_at   | AI852011 | Pik4ca           | phosphatidylinositol 4-kinase, catalytic, alpha polypeptide                                                                                |
| 94875_at    | AI838915 | Mrpl20           | mitochondrial ribosomal protein L20                                                                                                        |
| 96743_at    | AA958560 | 1810035L17Rik    | RIKEN cDNA 1810035L17 gene                                                                                                                 |
| 95746_at    | AW123765 | ---              | ---                                                                                                                                        |
| 95652_at    | AF110520 | Ndufa7           | NADH dehydrogenase (ubiquinone) 1 alpha subcomplex, 7 (B14.5a)                                                                             |
| 99636_at    | AI848033 | Poldip2          | polymerase (DNA-directed), delta interacting protein 2                                                                                     |
| 93339_at    | AI846243 | Mdm4             | transformed mouse 3T3 cell double minute 4                                                                                                 |
| 100706_f_at | AA407367 | Sfmbt2           | Scm-like with four mbt domains 2                                                                                                           |
| 96052_at    | AI852457 | Acp1 /// LOC6312 | acid phosphatase 1, soluble /// similar to acid phosphatase 1, soluble /// similar to acid phosphatase 1 isoform b /// similar to acid phc |
| 99365_at    | AA734487 | Coq3             | coenzyme Q3 homolog, methyltransferase (yeast)                                                                                             |
| 95525_at    | AI850793 | Ncoa6            | nuclear receptor coactivator 6                                                                                                             |
| 160174_at   | AI851650 | Xab2             | XPA binding protein 2                                                                                                                      |
| 94507_at    | U15977   | Acs1             | acyl-CoA synthetase long-chain family member 1                                                                                             |
| 103843_at   | M36777   | Gnao1            | guanine nucleotide binding protein, alpha o                                                                                                |
| 93994_at    | AW212131 | Chpt1            | choline phosphotransferase 1                                                                                                               |
| 160078_at   | X97490   | Ppp1r14b         | protein phosphatase 1, regulatory (inhibitor) subunit 14B                                                                                  |
| 160364_at   | X80232   | Sfrs10           | splicing factor, arginine/serine-rich 10 (transformer 2 homolog, Drosophila)                                                               |
| 102039_at   | AI850881 | Gtf2h4           | general transcription factor II H, polypeptide 4                                                                                           |
| 96345_at    | AI837012 | Ergic3           | ERGIC and golgi 3                                                                                                                          |
| 97836_at    | AI843444 | Rnf7             | ring finger protein 7                                                                                                                      |
| 92496_at    | AF035643 | Vamp5            | vesicle-associated membrane protein 5                                                                                                      |
| 101506_at   | AW227345 | Snrpa1           | small nuclear ribonucleoprotein polypeptide A'                                                                                             |
| 96785_at    | AF110520 | Ankr47           | ankyrin repeat domain 47                                                                                                                   |
| 104231_at   | AI606915 | Hnrph3 /// LOC66 | heterogeneous nuclear ribonucleoprotein H3 /// similar to heterogeneous nuclear ribonucleoprotein H3 isoform a                             |
| 160193_at   | AW125340 | Ormd2            | ORM1-like 2 (S. cerevisiae)                                                                                                                |
| 96292_r_at  | AI835847 | Ndufs6 /// LOC63 | NADH dehydrogenase (ubiquinone) Fe-S protein 6 /// similar to NADH dehydrogenase (ubiquinone) Fe-S protein 6                               |
| 103801_at   | AF094761 | Rtxank           | regulatory factor X-associated ankyrin-containing protein                                                                                  |
| 162440_r_at | AV347344 | ---              | ---                                                                                                                                        |
| 101567_at   | AB018567 | Prosc            | Proline synthetase co-transcribed                                                                                                          |
| 93760_at    | AI838759 | 1200020A08Rik    | RIKEN cDNA 1200020A08 gene                                                                                                                 |
| 161176_r_at | AV230593 | Stom             | stomatin                                                                                                                                   |
| 101070_at   | AW125438 | Mkrr1            | makorin, ring finger protein, 1                                                                                                            |
| 96701_at    | U35833   | Uble1b           | ubiquitin-like 1 (sentrin) activating enzyme E1B                                                                                           |
| 160874_r_at | AV101823 | Ruvbl1           | RuvB-like protein 1                                                                                                                        |
| 97390_at    | AW125294 | Cdc25a           | cell division cycle 25 homolog A (S. cerevisiae)                                                                                           |
| 160431_at   | AW124432 | Mrpl12           | mitochondrial ribosomal protein L12                                                                                                        |
| 96286_at    | AW060996 | Ubap1            | ubiquitin-associated protein 1                                                                                                             |
| 96577_i_at  | AI853019 | Ubap2l           | ubiquitin associated protein 2-like                                                                                                        |
| 160554_at   | AI839363 | Eif3s6           | eukaryotic translation initiation factor 3, subunit 6                                                                                      |
| 95118_r_at  | AI131895 | Kif22            | kinesin family member 22                                                                                                                   |
| 96344_at    | X61600   | Eno3             | enolase 3, beta muscle                                                                                                                     |
| 97685_at    | AI666301 | 1700023D09Rik    | RIKEN cDNA 1700023D09 gene                                                                                                                 |
| 101255_at   | X51703   | Ubb              | ubiquitin B                                                                                                                                |
| 102984_g_at | U58992   | Smad1            | MAD homolog 1 (Drosophila)                                                                                                                 |
| 102969_at   | AI847369 | 0610025P10Rik    | RIKEN cDNA 0610025P10 gene                                                                                                                 |
| 94038_at    | AA675468 | 2700060E02Rik    | RIKEN cDNA 2700060E02 gene                                                                                                                 |
| 96546_r_at  | AI447510 | Pcid2            | PCI domain containing 2                                                                                                                    |
| 160343_at   | AI848458 | Srp19            | signal recognition particle 19                                                                                                             |
| 160566_at   | AW121166 | Prss8            | protease, serine, 8 (prostatic)                                                                                                            |
| 96120_at    | AW124750 | Dnajb6           | DnaJ (Hsp40) homolog, subfamily B, member 6                                                                                                |
| 94362_at    | AI843682 | Nras             | neuroblastoma ras oncogene                                                                                                                 |
| 103442_at   | AI843399 | Dhrs7b           | dehydrogenase/reductase (SDR family) member 7B                                                                                             |
| 96872_at    | AI835846 | Sgta             | small glutamine-rich tetratricopeptide repeat (TPR)-containing, alpha                                                                      |
| 99127_at    | X61506   | Atxn10           | ataxin 10                                                                                                                                  |
| 93019_at    | Z35401   | H2afx            | H2A histone family, member X                                                                                                               |
| 95891_at    | AI591977 | Bex6             | brain expressed gene 6                                                                                                                     |
| 160426_at   | D31966   | Rpo1-1           | RNA polymerase 1-1                                                                                                                         |
| 94555_at    | AI845579 | Rnf167           | ring finger protein 167                                                                                                                    |
| 160240_at   | AI852051 | 1110003E01Rik    | RIKEN cDNA 1110003E01 gene                                                                                                                 |
| 102983_at   | U58992   | Smad1            | MAD homolog 1 (Drosophila)                                                                                                                 |
| 104332_at   | AI842242 | Ptcd2            | pentatricopeptide repeat domain 2                                                                                                          |

|             |          |                  |                                                                                                                                             |
|-------------|----------|------------------|---------------------------------------------------------------------------------------------------------------------------------------------|
| 161238_f_at | AV268209 | Cct3             | chaperonin subunit 3 (gamma)                                                                                                                |
| 93809_at    | U41736   | Aup1             | ancient ubiquitous protein                                                                                                                  |
| 99188_at    | AA615161 | 2010315L10Rik    | RIKEN cDNA 2010315L10 gene                                                                                                                  |
| 96029_at    | AI020542 | Sf3a3            | splicing factor 3a, subunit 3                                                                                                               |
| 92888_s_at  | U34973   | Styx             | phosphoserine/threonine/tyrosine interaction protein                                                                                        |
| 95091_at    | AI839895 | Sec131           | SEC13-like 1 (S. cerevisiae)                                                                                                                |
| 101008_at   | AB023485 | Tcerg1           | transcription elongation regulator 1 (CA150)                                                                                                |
| 104126_at   | AI854864 | Cstf2t           | cleavage stimulation factor, 3' pre-RNA subunit 2, tau                                                                                      |
| 98128_at    | U77128   | Atp5j            | ATP synthase, H+ transporting, mitochondrial F0 complex, subunit F                                                                          |
| 97843_at    | AI834866 | Ncoa4 /// 111003 | nuclear receptor coactivator 4 /// RIKEN cDNA 1110034E15 gene /// similar to nuclear receptor coactivator 4                                 |
| 104101_at   | AI837530 | Slc9a8           | solute carrier family 9 (sodium/hydrogen exchanger), member 8                                                                               |
| 94526_at    | AI848453 | D10Erd214e       | DNA segment, Chr 10, ERATO Doi 214, expressed                                                                                               |
| 94007_at    | AW122469 | Morf4i1 /// LOC4 | mortality factor 4 like 1 /// similar to mortality factor 4 like 1 isoform b /// RIKEN cDNA A730098P11 gene /// similar to mortality factor |
| 96012_f_at  | AI835367 | Matr3            | matrin 3                                                                                                                                    |
| 97250_at    | AW049326 | Nola3            | nucleolar protein family A, member 3                                                                                                        |
| 103395_at   | AF019564 | Sgca             | sarcoglycan, alpha (dystrophin-associated glycoprotein)                                                                                     |
| 100446_r_at | X91825   | Sprr1b           | small proline-rich protein 1B                                                                                                               |
| 99947_at    | U55861   | Tial1            | Tial1 cytotoxic granule-associated RNA binding protein-like 1                                                                               |
| 97179_at    | C76543   | BC048355         | cDNA sequence BC048355                                                                                                                      |
| 160397_at   | AI790328 | Ik               | IK cytokine                                                                                                                                 |
| 92621_at    | X97982   | Pcbp2            | poly(rC) binding protein 2                                                                                                                  |
| 97922_at    | AW045597 | Cyb5r4           | cytochrome b5 reductase 4                                                                                                                   |
| 94480_at    | AW260202 | D1Erd161e        | DNA segment, Chr 1, ERATO Doi 161, expressed                                                                                                |
| 99027_at    | L35049   | Bcl2l1           | Bcl2-like 1                                                                                                                                 |
| 93250_r_at  | X67668   | Hmgb2 /// LOC67  | high mobility group box 2 /// high mobility group box 2 /// high mobility group box 2                                                       |
| 92786_at    | AI626942 | Efhf1            | EF hand domain containing 1                                                                                                                 |
| 93374_at    | AI836349 | Jph3             | junctophilin 3                                                                                                                              |
| 160177_at   | AW123805 | Smu1             | smu-1 suppressor of mec-8 and unc-52 homolog (C. elegans)                                                                                   |
| 99656_at    | AI849027 | Trmt1            | TRM1 tRNA methyltransferase 1 homolog (S. cerevisiae)                                                                                       |
| 100051_at   | U17297   | Stom             | stomatin                                                                                                                                    |
| 93967_at    | AI850979 | Anapc11          | anaphase promoting complex subunit 11 homolog (yeast)                                                                                       |
| 103557_at   | AI850046 | Vps37c           | vacuolar protein sorting 37C (yeast)                                                                                                        |
| 98938_at    | AI852184 | 1500026D16Rik    | RIKEN cDNA 1500026D16 gene                                                                                                                  |
| 99467_at    | AI846922 | Rasa1            | RAS p21 protein activator 1                                                                                                                 |
| 96956_at    | AW125526 | Prdx5            | peroxiredoxin 5                                                                                                                             |
| 93741_at    | AA693066 | Nmd3             | NMD3 homolog (S. cerevisiae)                                                                                                                |
| 92428_at    | AF039405 | Asna1            | arsA (bacterial) arsenite transporter, ATP-binding, homolog 1                                                                               |
| 103840_at   | AJ011923 | Rad17            | RAD17 homolog (S. pombe)                                                                                                                    |
| 96874_g_at  | AI843287 | Tax1bp1          | Tax1 (human T-cell leukemia virus type I) binding protein 1                                                                                 |
| 104343_f_at | AI845798 | Pla2g12a         | phospholipase A2, group XIIA                                                                                                                |
| 104376_at   | AF006602 | Hdac5            | histone deacetylase 5                                                                                                                       |
| 95442_at    | AI835706 | BC010787         | cDNA sequence BC010787                                                                                                                      |
| 99175_at    | AI843396 | Gng10            | guanine nucleotide binding protein (G protein), gamma 10                                                                                    |
| 101440_at   | AW047074 | 2900006F19Rik    | RIKEN cDNA 2900006F19 gene                                                                                                                  |
| 160227_s_at | AI132491 | Bysl             | bystin-like                                                                                                                                 |
| 95096_at    | AI846695 | Qk               | quaking                                                                                                                                     |
| 93572_at    | AI835051 | Ndufs1           | NADH dehydrogenase (ubiquinone) Fe-S protein 1                                                                                              |
| 95737_at    | AW120814 | 1200015A19Rik    | RIKEN cDNA 1200015A19 gene                                                                                                                  |
| 160153_at   | AI835917 | Dnajc7           | DnaJ (Hsp40) homolog, subfamily C, member 7                                                                                                 |
| 93284_at    | D78135   | Cirbp            | cold inducible RNA binding protein                                                                                                          |
| 95147_at    | AI843795 | Pgls             | 6-phosphogluconolactonase                                                                                                                   |
| 160239_at   | AI844762 | Psm6             | proteasome (prosome, macropain) 26S subunit, non-ATPase, 6                                                                                  |
| 104762_r_at | AI850753 | Crsp8            | cofactor required for Sp1 transcriptional activation, subunit 8                                                                             |
| 160346_at   | AI841825 | Dalr3            | DALR anticodon binding domain containing 3                                                                                                  |
| 98937_at    | AW049795 | Tbrg1            | transforming growth factor beta regulated gene 1                                                                                            |
| 97923_at    | AW046532 | Herc1            | hect (homologous to the E6-AP (UBE3A) carboxyl terminus) domain and RCC1 (CHC1)-like domain (RLD) 1                                         |
| 94360_at    | AA672650 | 2700029M09Rik    | RIKEN cDNA 2700029M09 gene                                                                                                                  |
| 102271_at   | AW125462 | D11Bwg0280e      | DNA segment, Chr 11, Brigham & Women's Genetics 0280e expressed                                                                             |
| 96734_at    | AA674143 | Synj2bp          | synaptojanin 2 binding protein                                                                                                              |
| 160657_at   | AI835460 | Ilf3             | interleukin enhancer binding factor 3                                                                                                       |
| 98890_at    | AI848173 | 1700012G19Rik    | RIKEN cDNA 1700012G19 gene                                                                                                                  |
| 92828_at    | AB004789 | Dpm1             | dolichol-phosphate (beta-D) mannosyltransferase 1                                                                                           |
| 99652_at    | AF109905 | Bat5             | HLA-B associated transcript 5                                                                                                               |
| 93768_f_at  | AW124052 | 2700059D21Rik    | RIKEN cDNA 2700059D21 gene                                                                                                                  |
| 101449_at   | AW120841 | Trim41           | tripartite motif-containing 41                                                                                                              |
| 161214_r_at | AV265258 | BC037034         | cDNA sequence BC037034                                                                                                                      |
| 104038_at   | AI843511 | 4933434E20Rik    | RIKEN cDNA 4933434E20 gene                                                                                                                  |

|             |          |                  |                                                                                                                                                |
|-------------|----------|------------------|------------------------------------------------------------------------------------------------------------------------------------------------|
| 96647_at    | AA645440 | Dcun1d5          | DCN1, defective in cullin neddylation 1, domain containing 5 ( <i>S. cerevisiae</i> )                                                          |
| 101579_at   | X78304   | Srp9             | signal recognition particle 9                                                                                                                  |
| 98608_at    | A1845886 | Etf1             | eukaryotic translation termination factor 1                                                                                                    |
| 160534_at   | Z54219   | Psmc5            | protease (prosome, macropain) 26S subunit, ATPase 5                                                                                            |
| 97407_at    | A1848025 | Ubadc1           | ubiquitin associated domain containing 1                                                                                                       |
| 97428_at    | AF049850 | Dom3z            | DOM-3 homolog Z ( <i>C. elegans</i> )                                                                                                          |
| 161636_r_at | AV009532 | Plk3             | polo-like kinase 3 ( <i>Drosophila</i> )                                                                                                       |
| 104305_at   | AW120679 | Rarsl            | arginyl-tRNA synthetase-like                                                                                                                   |
| 101212_at   | AF043285 | Rps7             | ribosomal protein S7                                                                                                                           |
| 98463_at    | AW124186 | Smarca4          | SWI/SNF related, matrix associated, actin dependent regulator of chromatin, subfamily a, member 4                                              |
| 100404_at   | L31959   | Ift88            | intraflagellar transport 88 homolog ( <i>Chlamydomonas</i> )                                                                                   |
| 103082_at   | A1847507 | E230022H04Rik    | RIKEN cDNA E230022H04 gene                                                                                                                     |
| 97392_at    | AW050086 | Tmem129          | transmembrane protein 129                                                                                                                      |
| 96267_at    | A1846127 | Ndufv1           | NADH dehydrogenase (ubiquinone) flavoprotein 1                                                                                                 |
| 96259_at    | U35646   | Npepps           | aminopeptidase puromycin sensitive                                                                                                             |
| 162468_at   | AV064502 | Rhoc             | ras homolog gene family, member C                                                                                                              |
| 101961_at   | U67327   | Bub3             | budding uninhibited by benzimidazoles 3 homolog ( <i>S. cerevisiae</i> )                                                                       |
| 161446_r_at | AV353694 | Htra2            | HtrA serine peptidase 2                                                                                                                        |
| 101078_at   | Y16258   | Bsg              | basigin                                                                                                                                        |
| 97743_at    | AW047461 | Zc3h3            | zinc finger CCCH type containing 3                                                                                                             |
| 102647_g_at | AW122284 | Usp34            | ubiquitin specific peptidase 34                                                                                                                |
| 103428_at   | AW049684 | Pold3            | polymerase (DNA-directed), delta 3, accessory subunit                                                                                          |
| 97463_g_at  | A1847584 | Zfp706           | zinc finger protein 706                                                                                                                        |
| 160432_at   | A1853062 | U2af114          | U2 small nuclear RNA auxiliary factor 1-like 4                                                                                                 |
| 160872_f_at | AF034580 | 2310008H09Rik    | RIKEN cDNA 2310008H09 gene                                                                                                                     |
| 101781_f_at | V00754   | LOC238836 /// LC | similar to H3 histone, family 3B /// similar to H3 histone, family 3B /// similar to H3 histone, family 3B /// similar to H3 histone, family 3 |
| 93102_f_at  | U20365   | Actg2            | actin, gamma 2, smooth muscle, enteric                                                                                                         |
| 99101_at    | AB012580 | Eif3s7           | eukaryotic translation initiation factor 3, subunit 7 (zeta)                                                                                   |
| 92243_at    | AA117417 | B930007L02Rik    | RIKEN cDNA B930007L02 gene                                                                                                                     |
| 95695_at    | AB017112 | Slc25a20         | solute carrier family 25 (mitochondrial carnitine/acylcarnitine translocase), member 20                                                        |
| 97684_at    | Z46720   | Pick1            | protein interacting with C kinase 1                                                                                                            |
| 104288_at   | A1853265 | Cul4a            | cullin 4A                                                                                                                                      |
| 95136_at    | AW049185 | Arl6ip4          | ADP-ribosylation factor-like 6 interacting protein 4                                                                                           |
| 92838_at    | L33726   | Fscn1            | fascin homolog 1, actin bundling protein ( <i>Strongylocentrotus purpuratus</i> )                                                              |
| 161926_r_at | AV147906 | P4hb             | prolyl 4-hydroxylase, beta polypeptide                                                                                                         |
| 100380_at   | X91866   | H3f3a            | H3 histone, family 3A                                                                                                                          |
| 104269_at   | AB026806 | Syt5             | synaptotagmin V                                                                                                                                |
| 160871_at   | AB023656 | Kif1b            | kinesin family member 1B                                                                                                                       |
| 161052_r_at | X65506   | Krt1-5           | keratin complex 1, acidic, gene 5                                                                                                              |
| 103866_at   | AW124359 | Pik3cd           | phosphatidylinositol 3-kinase catalytic delta polypeptide                                                                                      |
| 98155_r_at  | Z72486   | Pold2            | polymerase (DNA directed), delta 2, regulatory subunit                                                                                         |
| 102805_at   | M77196   | Ceacam1          | CEA-related cell adhesion molecule 1                                                                                                           |
