# Supplementary material
Source: PubMed Central journal article supplement (PMC4091824)
Supplement: NIHMS583353-supplement-Supplemental_Table_2.pdf [file NIHMS583353-supplement-Supplemental_Table_2.pdf]

**Supplemental Table 2. Somatic Cell Cluster (WT<Cr, Bu, 2,222 probesets)**

| Probeset    | Accession # | Gene           | Description                                                   |
|-------------|-------------|----------------|---------------------------------------------------------------|
| 102266_at   | X55957      | Inha           | inhibin alpha                                                 |
| 99452_at    | U49507      | Lsr            | lipolysis stimulated lipoprotein receptor                     |
| 98590_at    | D89571      | Sdc4           | syndecan 4                                                    |
| 93798_at    | AI839988    | Atp1a1         | ATPase, Na+/K+ transporting, alpha 1 polypeptide              |
| 94789_r_at  | X04663      | Tubb5          | tubulin, beta 5                                               |
| 102370_at   | AA822174    | Dhrs8          | dehydrogenase/reductase (SDR family) member 8                 |
| 101187_at   | U67878      | Serpina5       | serine (or cysteine) peptidase inhibitor, clade A, member 5   |
| 92223_at    | X66295      | C1qc           | complement component 1, q subcomponent, C chain               |
| 101587_at   | U89491      | Ephx1          | epoxide hydrolase 1, microsomal                               |
| 95555_at    | AF030169    | Unc119         | unc-119 homolog (C. elegans)                                  |
| 101881_g_at | L22545      | Col18a1        | procollagen, type XVIII, alpha 1                              |
| 98600_at    | U41341      | S100a11        | S100 calcium binding protein A11 (calizzarin)                 |
| 93320_at    | AF017175    | Cpt1a          | carnitine palmitoyltransferase 1a, liver                      |
| 92866_at    | X52643      | H2-Aa          | histocompatibility 2, class II antigen A, alpha               |
| 96766_s_at  | AB000828    | Tyro3          | TYRO3 protein tyrosine kinase 3                               |
| 93793_at    | AW122780    | Lasp1          | LIM and SH3 protein 1                                         |
| 100155_at   | L57509      | Ddr1           | discoidin domain receptor family, member 1                    |
| 95708_at    | AI843466    | D3Ucla1        | DNA segment, Chr 3, University of California at Los Angeles 1 |
| 99597_at    | AI841629    | Gnai2          | guanine nucleotide binding protein, alpha inhibiting 2        |
| 103460_at   | AI849939    | Ddit4          | DNA-damage-inducible transcript 4                             |
| 94375_at    | Y11666      | Hk2            | hexokinase 2                                                  |
| 101487_f_at | U47737      | Ly6e           | lymphocyte antigen 6 complex, locus E                         |
| 95356_at    | D00466      | ApoE           | apolipoprotein E                                              |
| 94276_at    | AF064635    | Hsd17b12       | hydroxysteroid (17-beta) dehydrogenase 12                     |
| 96605_at    | AI787183    | 0610011104Rik  | RIKEN cDNA 0610011104 gene                                    |
| 104374_at   | M64086      | Serpina3n      | serine (or cysteine) peptidase inhibitor, clade A, member 3N  |
| 160253_at   | AW125390    | Ifitm3         | interferon induced transmembrane protein 3                    |
| 94831_at    | M65270      | Ctsb           | cathepsin B                                                   |
| 162274_f_at | AV366567    | Lsr            | lipolysis stimulated lipoprotein receptor                     |
| 97473_at    | AW124470    | Tspan4         | tetraspanin 4                                                 |
| 102363_r_at | U20735      | Junb           | Jun-B oncogene                                                |
| 97317_at    | AW122933    | Enpp2          | ectonucleotide pyrophosphatase/phosphodiesterase 2            |
| 101753_s_at | X51547      | Lyzs /// Lzp-s | lysozyme /// P lysozyme structural                            |
| 98562_at    | X58861      | C1qa           | complement component 1, q subcomponent, alpha polypeptide     |
| 95079_at    | M57683      | Pdgfra         | platelet derived growth factor receptor, alpha polypeptide    |
| 97901_at    | X60831      | Ubf1           | upstream binding transcription factor, RNA polymerase I       |
| 94354_at    | AI845514    | Abca1          | ATP-binding cassette, sub-family A (ABC1), member 1           |
| 94535_at    | AW121844    | Add1           | adducin 1 (alpha)                                             |
| 160150_f_at | AW125626    | Cnn3           | calponin 3, acidic                                            |
| 98623_g_at  | X71922      | Igf2           | insulin-like growth factor 2                                  |
| 93866_s_at  | D00613      | Mgp            | matrix Gla protein                                            |
| 100946_at   | AF109906    | Hspa1b         | heat shock protein 1B                                         |
| 94384_at    | X67644      | Ier3           | immediate early response 3                                    |
| 162479_f_at | AV097950    | ---            | ---                                                           |
| 96186_at    | AI839286    | Lrp10          | low-density lipoprotein receptor-related protein 10           |
| 100134_at   | X77952      | Eng            | endoglin                                                      |
| 103051_at   | X93037      | Expi           | extracellular proteinase inhibitor                            |
| 95496_at    | AI848866    | Prpsap1        | phosphoribosyl pyrophosphate synthetase-associated protein 1  |
| 93775_at    | AI841894    | D12Ert647e     | DNA segment, Chr 12, ERATO Doi 647, expressed                 |
| 95348_at    | J04596      | Cxcl1          | chemokine (C-X-C motif) ligand 1                              |
| 104432_at   | AF016482    | Rnd2           | Rho family GTPase 2                                           |
| 98402_at    | AI843799    | Macf1          | microtubule-actin crosslinking factor 1                       |
| 101510_at   | AB007136    | Psme1          | proteasome (prosome, macropain) 28 subunit, alpha             |
| 100927_at   | U28960      | Pltp           | phospholipid transfer protein                                 |
| 96113_at    | AI846519    | D18Wsu98e      | DNA segment, Chr 18, Wayne State University 98, expressed     |
| 99577_at    | M57647      | Kitl           | kit ligand                                                    |
| 160273_at   | AA960603    | Zfp36l2        | zinc finger protein 36, C3H type-like 2                       |
| 101580_at   | AI851220    | Cox7b          | cytochrome c oxidase subunit VIIb                             |
| 99109_at    | M59821      | Ier2           | immediate early response 2                                    |
| 102860_at   | M64085      | Serpina3g      | serine (or cysteine) peptidase inhibitor, clade A, member 3G  |
| 93013_at    | AF077861    | Id2            | inhibitor of DNA binding 2                                    |
| 96020_at    | M22531      | C1qb           | complement component 1, q subcomponent, beta polypeptide      |

|             |          |                  |                                                                                                                    |
|-------------|----------|------------------|--------------------------------------------------------------------------------------------------------------------|
| 97942_g_at  | Y12582   | Capn6            | calpain 6                                                                                                          |
| 101392_at   | AW122839 | Chmp7            | CHMP family, member 7                                                                                              |
| 98911_at    | AI837528 | Jak1             | Janus kinase 1                                                                                                     |
| 101542_f_at | L25126   | Ddx3x            | DEAD/H (Asp-Glu-Ala-Asp/His) box polypeptide 3, X-linked                                                           |
| 99183_at    | AW123013 | Ppp3r1           | protein phosphatase 3, regulatory subunit B, alpha isoform (calcineurin B, type I)                                 |
| 100611_at   | M21050   | Lyzs             | lysozyme                                                                                                           |
| 160669_at   | AI848835 | Htatsf1          | HIV TAT specific factor 1                                                                                          |
| 101130_at   | X58251   | Col1a2           | procollagen, type I, alpha 2                                                                                       |
| 96262_at    | AI836812 | Rab5c            | RAB5C, member RAS oncogene family                                                                                  |
| 94398_s_at  | AF040094 | Inpp5b           | inositol polyphosphate-5-phosphatase B                                                                             |
| 96924_at    | AI849719 | Wdr82            | WD repeat domain containing 82                                                                                     |
| 92793_at    | X57796   | Tnfrsf1a         | tumor necrosis factor receptor superfamily, member 1a                                                              |
| 102787_at   | AI841654 | Gpr56            | G protein-coupled receptor 56                                                                                      |
| 103781_at   | U76832   | Stx4a            | syntaxin 4A (placental)                                                                                            |
| 92232_at    | U88328   | Socs3            | suppressor of cytokine signaling 3                                                                                 |
| 161612_f_at | AV350617 | Tubb3 /// LOC54  | tubulin, beta 3 /// similar to tubulin, beta 3 /// similar to tubulin, beta 3                                      |
| 104412_at   | AI153412 | Gnai1            | guanine nucleotide binding protein, alpha inhibiting 1                                                             |
| 101554_at   | U57524   | Nfkbia           | nuclear factor of kappa light chain gene enhancer in B-cells inhibitor, alpha                                      |
| 95015_at    | AB027125 | Akr1c12          | aldo-keto reductase family 1, member C12                                                                           |
| 95620_at    | AW120882 | Dhrs7            | dehydrogenase/reductase (SDR family) member 7                                                                      |
| 94288_at    | J03482   | Hist1h1c         | histone 1, H1c                                                                                                     |
| 94305_at    | U03419   | Col1a1           | procollagen, type I, alpha 1                                                                                       |
| 102362_i_at | U20735   | Junb             | Jun-B oncogene                                                                                                     |
| 95599_at    | D28941   | St3gal4          | ST3 beta-galactoside alpha-2,3-sialyltransferase 4                                                                 |
| 101964_at   | U05809   | Tkt              | transketolase                                                                                                      |
| 103433_at   | AI846077 | Pscd3            | pleckstrin homology, Sec7 and coiled-coil domains 3                                                                |
| 95066_at    | U67611   | Taldo1           | transaldolase 1                                                                                                    |
| 97844_at    | U67187   | Rgs2             | regulator of G-protein signaling 2                                                                                 |
| 93252_at    | X81816   | Bcap31           | B-cell receptor-associated protein 31                                                                              |
| 98918_at    | AI841920 | Txndc5           | thioredoxin domain containing 5                                                                                    |
| 93269_at    | AI848952 | Glo1             | glyoxalase 1                                                                                                       |
| 102850_at   | AF037260 | Tnk2             | tyrosine kinase, non-receptor, 2                                                                                   |
| 98007_at    | AJ131021 | Rps6ka2          | ribosomal protein S6 kinase, polypeptide 2                                                                         |
| 101359_at   | U43541   | Lamb2            | laminin, beta 2                                                                                                    |
| 104257_g_at | AI120844 | Pscdbp           | pleckstrin homology, Sec7 and coiled-coil domains, binding protein                                                 |
| 160317_at   | AI835712 | Rab34            | RAB34, member of RAS oncogene family                                                                               |
| 102752_at   | AF072697 | Cyfp1            | cytoplasmic FMR1 interacting protein 1                                                                             |
| 103904_at   | X81584   | Igfbp6           | insulin-like growth factor binding protein 6                                                                       |
| 95468_at    | AI850202 | Egln1            | EGL nine homolog 1 (C. elegans)                                                                                    |
| 160388_at   | AI848668 | Sc4mol           | sterol-C4-methyl oxidase-like                                                                                      |
| 96085_at    | L06047   | Gsta4            | glutathione S-transferase, alpha 4                                                                                 |
| 96075_at    | AW060876 | Wdr1             | WD repeat domain 1                                                                                                 |
| 100621_at   | AI848825 | Rnh1             | ribonuclease/angiogenin inhibitor 1                                                                                |
| 101059_at   | D76440   | Ndn              | necdin                                                                                                             |
| 96166_at    | AI842524 | Tex261           | testis expressed gene 261                                                                                          |
| 96832_at    | AA606878 | Slc39a1          | solute carrier family 39 (zinc transporter), member 1                                                              |
| 101055_at   | J05261   | Ppgb             | protective protein for beta-galactosidase                                                                          |
| 104716_at   | X60367   | Rbp1             | retinol binding protein 1, cellular                                                                                |
| 100951_at   | AF014010 | Pkd2             | polycystic kidney disease 2                                                                                        |
| 93833_s_at  | X05862   | Hist1h2bc        | histone 1, H2bc                                                                                                    |
| 92558_at    | M84487   | Vcam1            | vascular cell adhesion molecule 1                                                                                  |
| 95661_at    | L08115   | Cd9              | CD9 antigen                                                                                                        |
| 104149_at   | AI642048 | Nfkbia           | nuclear factor of kappa light chain gene enhancer in B-cells inhibitor, alpha                                      |
| 160268_at   | AI847146 | Pdcl3            | phosducin-like 3                                                                                                   |
| 98535_at    | AF076156 | Comt             | catechol-O-methyltransferase                                                                                       |
| 100472_at   | D10727   | Enah             | enabled homolog (Drosophila)                                                                                       |
| 100474_at   | X99646   | St8sia2          | ST8 alpha-N-acetyl-neuraminide alpha-2,8-sialyltransferase 2                                                       |
| 160828_at   | X69620   | Inhbb            | inhibin beta-B                                                                                                     |
| 104066_at   | AI842192 | AW548124         | expressed sequence AW548124                                                                                        |
| 103695_f_at | AW047329 | C330007P06Rik    | RIKEN cDNA C330007P06 gene                                                                                         |
| 100039_at   | AW125880 | Tmem4            | transmembrane protein 4                                                                                            |
| 99032_at    | AF009246 | Rasd1            | RAS, dexamethasone-induced 1                                                                                       |
| 162011_f_at | AV246963 | Rhou             | ras homolog gene family, member U                                                                                  |
| 101872_at   | J03958   | Gsta2 /// LOC625 | glutathione S-transferase, alpha 2 (Yc2) /// similar to Glutathione S-transferase Ya chain (GST class-alpha) (Ya1) |
| 99643_f_at  | X61232   | Cpe /// LOC6773  | carboxypeptidase E /// similar to carboxypeptidase E                                                               |
| 95541_at    | AW125506 | D6Wsu176e        | DNA segment, Chr 6, Wayne State University 176, expressed                                                          |

|             |          |               |                                                                             |
|-------------|----------|---------------|-----------------------------------------------------------------------------|
| 104637_at   | AI326397 | Gstm6         | glutathione S-transferase, mu 6                                             |
| 101560_at   | AW061330 | Emb           | embigin                                                                     |
| 96811_at    | AW049806 | Rab31         | RAB31, member RAS oncogene family                                           |
| 93285_at    | AI845584 | Dusp6         | dual specificity phosphatase 6                                              |
| 96058_s_at  | U07235   | Aldh2         | aldehyde dehydrogenase 2, mitochondrial                                     |
| 96627_at    | X97755   | Ebp           | phenylalkylamine Ca2+ antagonist (emopamil) binding protein                 |
| 100443_at   | AF031467 | Bcat2         | branched chain aminotransferase 2, mitochondrial                            |
| 160387_at   | AI853900 | Cd302         | CD302 antigen                                                               |
| 104002_at   | AI153693 | Zfp275        | zinc finger protein 275                                                     |
| 100136_at   | M32017   | Lamp2         | lysosomal membrane glycoprotein 2                                           |
| 94043_at    | AB031290 | Atp6ap1       | ATPase, H+ transporting, lysosomal accessory protein 1                      |
| 93534_at    | X53929   | Dcn           | decorin                                                                     |
| 96751_at    | AI842674 | Arl5a         | ADP-ribosylation factor-like 5A                                             |
| 160328_at   | AI838015 | Prss15        | protease, serine, 15                                                        |
| 94433_at    | AW060684 | Slc38a2       | solute carrier family 38, member 2                                          |
| 102707_f_at | X61597   | Serpina3c     | serine (or cysteine) peptidase inhibitor, clade A, member 3C                |
| 160440_at   | U79748   | Smad4         | MAD homolog 4 (Drosophila)                                                  |
| 160840_at   | AI853706 | Arhgef3       | Rho guanine nucleotide exchange factor (GEF) 3                              |
| 102002_at   | AI836406 | Ubqln2        | ubiquilin 2                                                                 |
| 103402_at   | AI848522 | Tm7sf3        | transmembrane 7 superfamily member 3                                        |
| 93439_f_at  | AA260005 | ---           | ---                                                                         |
| 100064_f_at | M63801   | Gja1          | gap junction membrane channel protein alpha 1                               |
| 96165_at    | AW125109 | LOC677213     | similar to U2AF homology motif (UHM) kinase 1                               |
| 100596_at   | M32032   | Selenbp1      | selenium binding protein 1                                                  |
| 92581_at    | U07159   | Acadm         | acyl-Coenzyme A dehydrogenase, medium chain                                 |
| 95625_at    | AI840149 | Slc6a8        | solute carrier family 6 (neurotransmitter transporter, creatine), member 8  |
| 160255_at   | AA657044 | Ahnak         | AHNAK nucleoprotein (desmoyokin)                                            |
| 95485_at    | D29639   | Hadhsc        | L-3-hydroxyacyl-Coenzyme A dehydrogenase, short chain                       |
| 96017_at    | AA710907 | 0610006I08Rik | RIKEN cDNA 0610006I08 gene                                                  |
| 160464_s_at | U60593   | Ndr1          | N-myc downstream regulated-like                                             |
| 99638_at    | D17546   | Col18a1       | procollagen, type XVIII, alpha 1                                            |
| 93595_at    | AF111172 | Tpp1          | tripeptidyl peptidase I                                                     |
| 99178_at    | AI845652 | Gpm6b         | glycoprotein m6b                                                            |
| 102737_at   | U35233   | Edn1          | endothelin 1                                                                |
| 104030_at   | AI848841 | Ptch1         | patched homolog 1                                                           |
| 100884_at   | U04204   | Akr1b8        | aldo-keto reductase family 1, member B8                                     |
| 98122_at    | AF074600 | Lmo4          | LIM domain only 4                                                           |
| 93826_at    | AI956230 | Ppp2r5a       | protein phosphatase 2, regulatory subunit B (B56), alpha isoform            |
| 98454_at    | Y14771   | Palm          | paralemmin                                                                  |
| 99994_at    | AF041376 | Cidea         | cell death-inducing DNA fragmentation factor, alpha subunit-like effector A |
| 95016_at    | D50086   | Nrp1          | neuropilin 1                                                                |
| 99633_at    | AB017608 | Ncdn          | neurochondrin                                                               |
| 162095_f_at | AV341518 | Gas7          | growth arrest specific 7                                                    |
| 101368_at   | M32484   | Rhox5         | reproductive homeobox 5                                                     |
| 93305_f_at  | AF053724 | Vamp8         | vesicle-associated membrane protein 8                                       |
| 160275_at   | AI840996 | Sepx1         | selenoprotein X 1                                                           |
| 99608_at    | U20611   | Prdx2         | peroxiredoxin 2                                                             |
| 99979_at    | X78445   | Cyp1b1        | cytochrome P450, family 1, subfamily b, polypeptide 1                       |
| 93261_at    | AJ000990 | Lgmn          | legumain                                                                    |
| 97519_at    | X13986   | Spp1          | secreted phosphoprotein 1                                                   |
| 94365_at    | AA710175 | Hint2         | histidine triad nucleotide binding protein 2                                |
| 94345_at    | AI843709 | Il6st         | interleukin 6 signal transducer                                             |
| 161026_s_at | AB025259 | Syt14         | synaptotagmin-like 4                                                        |
| 100065_r_at | M63801   | Gja1          | gap junction membrane channel protein alpha 1                               |
| 101084_f_at | AI527477 | Dpm3          | dolichyl-phosphate mannosyltransferase polypeptide 3                        |
| 99080_at    | AI853930 | Ccdc6         | coiled-coil domain containing 6                                             |
| 101882_s_at | U03715   | Col18a1       | procollagen, type XVIII, alpha 1                                            |
| 103922_f_at | AI839690 | Cyb5r1        | cytochrome b5 reductase 1                                                   |
| 101047_at   | AW123697 | Cd99          | CD99 antigen                                                                |
| 162206_f_at | AV374868 | Socs3         | suppressor of cytokine signaling 3                                          |
| 160901_at   | V00727   | Fos           | FBJ osteosarcoma oncogene                                                   |
| 160894_at   | X61800   | Cebpd         | CCAAT/enhancer binding protein (C/EBP), delta                               |
| 97496_f_at  | AW048944 | Prkcdp        | protein kinase C, delta binding protein                                     |
| 96353_at    | AW125346 | Tmem14c       | transmembrane protein 14C                                                   |
| 160312_at   | AW125031 | Cmtm6         | CKLF-like MARVEL transmembrane domain containing 6                          |
| 94020_at    | Y17808   | Ptk9l         | protein tyrosine kinase 9-like (A6-related protein)                         |

|             |          |                   |                                                                                                                                         |
|-------------|----------|-------------------|-----------------------------------------------------------------------------------------------------------------------------------------|
| 103020_s_at | AI317205 | Map3k1 /// LOC6   | mitogen activated protein kinase kinase kinase 1 /// similar to Mitogen-activated protein kinase kinase kinase 1 (MAPK/ERK kinase k     |
| 103804_at   | AB006960 | Reck              | reversion-inducing-cysteine-rich protein with kazal motifs                                                                              |
| 94458_at    | Y13087   | Casp6             | caspase 6                                                                                                                               |
| 95114_s_at  | AI844999 | Cuta              | cutA divalent cation tolerance homolog (E. coli)                                                                                        |
| 94862_i_at  | AI850000 | Dynlrb1           | dynein light chain roadblock-type 1                                                                                                     |
| 93063_at    | U82624   | App               | amyloid beta (A4) precursor protein                                                                                                     |
| 95673_s_at  | AW124113 | Basp1             | brain abundant, membrane attached signal protein 1                                                                                      |
| 101867_at   | U11680   | Gpam              | glycerol-3-phosphate acyltransferase, mitochondrial                                                                                     |
| 100012_at   | U29539   | Laptn5            | lysosomal-associated protein transmembrane 5                                                                                            |
| 160094_at   | AW123518 | Arpc4             | actin related protein 2/3 complex, subunit 4                                                                                            |
| 99191_at    | AI844939 | Cri1              | CREBBP/EP300 inhibitory protein 1                                                                                                       |
| 97489_at    | AI846739 | Pygb              | brain glycogen phosphorylase                                                                                                            |
| 97125_f_at  | M58156   | LOC56628          | MHC (A.CA/J(H-2K-f) class I antigen                                                                                                     |
| 96285_at    | AJ001616 | Myadm             | myeloid-associated differentiation marker                                                                                               |
| 104274_at   | AW124843 | Cpne3             | copine III                                                                                                                              |
| 98472_at    | Y00629   | H2-T23 /// C9200  | histocompatibility 2, T region locus 23 /// RIKEN cDNA C920025E04 gene                                                                  |
| 101973_at   | Y15163   | Cited2 /// LOC67  | Cbp/p300-interacting transactivator, with Glu/Asp-rich carboxy-terminal domain, 2 /// similar to Cbp/p300-interacting transactivator, w |
| 94834_at    | U06119   | Ctsh              | cathepsin H                                                                                                                             |
| 94556_at    | AI746846 | Snx10             | sorting nexin 10                                                                                                                        |
| 103392_at   | U12919   | Adcy7             | adenylate cyclase 7                                                                                                                     |
| 92302_at    | Z11664   | Sos2              | Son of sevenless homolog 2 (Drosophila)                                                                                                 |
| 97947_at    | AI836959 | ---               | ---                                                                                                                                     |
| 160280_at   | AI747654 | Cav1              | caveolin, caveolae protein 1                                                                                                            |
| 104744_at   | AW046775 | Tmem55a           | transmembrane protein 55A                                                                                                               |
| 96260_at    | AB021491 | AL033314          | expressed sequence AL033314                                                                                                             |
| 94282_at    | AW124297 | Asah1             | N-acylsphingosine amidohydrolase 1                                                                                                      |
| 96865_at    | M60474   | ---               | 0 day neonate cerebellum cDNA, RIKEN full-length enriched library, clone:C230070N19 product:myristoylated alanine rich protein kii      |
| 102207_at   | AW123249 | Nrbp2             | nuclear receptor binding protein 2                                                                                                      |
| 94948_at    | AF097511 | Trip6             | thyroid hormone receptor interactor 6                                                                                                   |
| 102886_at   | X83577   | Gpc4              | glypican 4                                                                                                                              |
| 101462_r_at | U06944   | Pja1              | praja1, RING-H2 motif containing                                                                                                        |
| 97556_at    | AI843178 | Anp32e            | acidic (leucine-rich) nuclear phosphoprotein 32 family, member E                                                                        |
| 95426_at    | AW048512 | Echs1             | enoyl Coenzyme A hydratase, short chain, 1, mitochondrial                                                                               |
| 94394_at    | M21019   | Rras              | Harvey rat sarcoma oncogene, subgroup R                                                                                                 |
| 103644_at   | D13139   | Dpep1             | dipeptidase 1 (renal)                                                                                                                   |
| 99642_i_at  | X61232   | Cpe /// LOC6773   | carboxypeptidase E /// similar to carboxypeptidase E                                                                                    |
| 102729_f_at | AF031170 | Hsd3b6            | hydroxysteroid dehydrogenase-6, delta-5->-3-beta                                                                                        |
| 101932_at   | D83484   | Ptpre             | protein tyrosine phosphatase, receptor type, E                                                                                          |
| 100044_at   | U19582   | Cldn11            | claudin 11                                                                                                                              |
| 98440_at    | AA596710 | Ltb4dh            | leukotriene B4 12-hydroxydehydrogenase                                                                                                  |
| 92925_at    | M61007   | Cebpb             | CCAAT/enhancer binding protein (C/EBP), beta                                                                                            |
| 96662_at    | AI847054 | Ppap2b            | phosphatidic acid phosphatase type 2B                                                                                                   |
| 160966_at   | AA145282 | Zfp187            | zinc finger protein 187                                                                                                                 |
| 160527_at   | AB012886 | Igfbp7 /// LOC621 | insulin-like growth factor binding protein 7 /// similar to O-acyltransferase (membrane bound) domain containing 2                      |
| 97934_at    | U73820   | Galnt1            | UDP-N-acetyl-alpha-D-galactosamine:polypeptide N-acetylgalactosaminyltransferase 1                                                      |
| 93038_f_at  | M69260   | Anxa1             | annexin A1                                                                                                                              |
| 95161_at    | AW120628 | Ctdsp2            | CTD (carboxy-terminal domain, RNA polymerase II, polypeptide A) small phosphatase 2                                                     |
| 95425_at    | U21489   | Acadl             | acyl-Coenzyme A dehydrogenase, long-chain                                                                                               |
| 94561_at    | AI836140 | Lima1             | LIM domain and actin binding 1                                                                                                          |
| 102032_at   | AW060819 | Twsg1             | twisted gastrulation homolog 1 (Drosophila)                                                                                             |
| 93026_at    | AW124337 | Mgst1             | microsomal glutathione S-transferase 1                                                                                                  |
| 103017_at   | AI060729 | LOC664862         | similar to transmembrane 7 superfamily member 1                                                                                         |
| 97485_at    | AI850953 | ---               | ---                                                                                                                                     |
| 101934_at   | AI851119 | Fez2              | fasciculation and elongation protein zeta 2 (zygin II)                                                                                  |
| 98625_s_at  | M84147   | Adh5 /// LOC635   | alcohol dehydrogenase 5 (class III), chi polypeptide /// similar to alcohol dehydrogenase 5 (class III), chi polypeptide                |
| 97329_at    | AW124061 | Ints3             | integrator complex subunit 3                                                                                                            |
| 93497_at    | K02782   | C3                | complement component 3                                                                                                                  |
| 95523_at    | AI839718 | 2900062L11Rik     | RIKEN cDNA 2900062L11 gene                                                                                                              |
| 94817_at    | X60676   | Serpinh1          | serine (or cysteine) peptidase inhibitor, clade H, member 1                                                                             |
| 104628_at   | X61172   | Man2a1            | mannosidase 2, alpha 1                                                                                                                  |
| 93354_at    | Z22661   | Apoc1             | apolipoprotein C-I                                                                                                                      |
| 101389_at   | AB008553 | Scarb2            | scavenger receptor class B, member 2                                                                                                    |
| 93838_at    | AI846994 | 2700038C09Rik     | RIKEN cDNA 2700038C09 gene                                                                                                              |
| 100970_at   | X65687   | Akt1              | thymoma viral proto-oncogene 1                                                                                                          |
| 94278_at    | D37837   | Lcp1              | lymphocyte cytosolic protein 1                                                                                                          |
| 102399_at   | AW123909 | Rbpms             | RNA binding protein gene with multiple splicing                                                                                         |

|             |          |               |                                                                                                                  |
|-------------|----------|---------------|------------------------------------------------------------------------------------------------------------------|
| 98485_at    | AI850288 | Rhpn2         | rophilin, Rho GTPase binding protein 2                                                                           |
| 93852_at    | AW045443 | Mef2a         | myocyte enhancer factor 2A                                                                                       |
| 99010_at    | AB024538 | Islr          | immunoglobulin superfamily containing leucine-rich repeat                                                        |
| 161294_f_at | AV003873 | Clu           | clusterin                                                                                                        |
| 92213_at    | L36062   | Star          | steroidogenic acute regulatory protein                                                                           |
| 102108_f_at | AI505453 | Myh9          | myosin, heavy polypeptide 9, non-muscle                                                                          |
| 103348_at   | AI837688 | Osbp          | oxysterol binding protein                                                                                        |
| 92477_at    | AA681862 | Spin          | spindlin                                                                                                         |
| 102381_at   | AA619207 | Acsl4         | acyl-CoA synthetase long-chain family member 4                                                                   |
| 94330_at    | AA710564 | Npl           | N-acetylneuraminate pyruvate lyase                                                                               |
| 97017_f_at  | AW214439 | ---           | ---                                                                                                              |
| 94461_at    | AI852144 | Pbef1         | pre-B-cell colony-enhancing factor 1                                                                             |
| 97553_at    | AI841884 | Galnt2        | UDP-N-acetyl-alpha-D-galactosamine:polypeptide N-acetylgalactosaminyltransferase 2                               |
| 93043_at    | D50463   | Nptn          | neuroplastin                                                                                                     |
| 97426_at    | X98471   | Emp1          | epithelial membrane protein 1                                                                                    |
| 98427_s_at  | M57999   | Nfkb1         | nuclear factor of kappa light chain gene enhancer in B-cells 1, p105                                             |
| 96657_at    | L10244   | Sat1          | spermidine/spermine N1-acetyl transferase 1                                                                      |
| 101031_at   | M14689   | Surf1         | surfeit gene 1                                                                                                   |
| 96526_at    | AW228840 | D030029J20Rik | RIKEN cDNA D030029J20 gene                                                                                       |
| 92775_at    | AA656757 | Pabpc4        | poly A binding protein, cytoplasmic 4                                                                            |
| 98543_at    | AJ223208 | Ctss          | cathepsin S                                                                                                      |
| 95019_at    | X98055   | Gstt1         | glutathione S-transferase, theta 1                                                                               |
| 92586_at    | X57024   | Glud1         | glutamate dehydrogenase 1                                                                                        |
| 94428_at    | AI842668 | Iivbl         | iivB (bacterial acetolactate synthase)-like                                                                      |
| 161259_f_at | AV283483 | Serpina5      | serine (or cysteine) peptidase inhibitor, clade A, member 5                                                      |
| 94339_at    | AI841330 | D11ErtD18e    | DNA segment, Chr 11, ERATO Doi 18, expressed                                                                     |
| 100099_at   | Z14132   | Smpd1         | sphingomyelin phosphodiesterase 1, acid lysosomal                                                                |
| 102912_at   | AI265115 | Tnks2         | tankyrase, TRF1-interacting ankyrin-related ADP-ribose polymerase 2                                              |
| 102395_at   | Z38110   | Pmp22         | peripheral myelin protein                                                                                        |
| 96530_at    | AI503926 | ---           | Transcribed locus                                                                                                |
| 102854_s_at | U03434   | Atp7a         | ATPase, Cu <sup>++</sup> transporting, alpha polypeptide                                                         |
| 92202_g_at  | AI553024 | Zbtb16        | zinc finger and BTB domain containing 16                                                                         |
| 101446_at   | AF004428 | Tpd521        | tumor protein D52-like 1                                                                                         |
| 92958_at    | AI849135 | Foxo3a        | forkhead box O3a                                                                                                 |
| 101030_at   | X99963   | Rhob          | ras homolog gene family, member B                                                                                |
| 92648_at    | U19521   | Stxbp3a       | syntaxin binding protein 3A                                                                                      |
| 103226_at   | Z11974   | Mrc1          | mannose receptor, C type 1                                                                                       |
| 100444_at   | D29678   | Cdk5          | cyclin-dependent kinase 5                                                                                        |
| 102919_at   | D42124   | Mafk          | v-maf musculoaponeurotic fibrosarcoma oncogene family, protein K (avian)                                         |
| 100133_at   | M27266   | Fyn           | Fyn proto-oncogene                                                                                               |
| 92658_at    | AF010405 | Foxq1         | forkhead box Q1                                                                                                  |
| 94049_at    | AF033381 | Bhmt          | betaine-homocysteine methyltransferase                                                                           |
| 99447_at    | AI021178 | 1110007L15Rik | RIKEN cDNA 1110007L15 gene                                                                                       |
| 96354_at    | AI854802 | Mbnl1         | muscleblind-like 1 (Drosophila)                                                                                  |
| 94061_at    | M13018   | Crip1         | cysteine-rich protein 1 (intestinal)                                                                             |
| 160765_at   | AW120781 | Ptges2        | prostaglandin E synthase 2                                                                                       |
| 104366_at   | AW047831 | BC039093      | cDNA sequence BC039093                                                                                           |
| 93753_at    | AI852632 | Litaf         | LPS-induced TN factor                                                                                            |
| 96887_at    | Y08702   | Ndubf11       | NADH dehydrogenase (ubiquinone) 1 beta subcomplex, 11                                                            |
| 93997_at    | AI853475 | Ifrg15        | interferon alpha responsive gene                                                                                 |
| 94821_at    | AW123880 | Xbp1          | X-box binding protein 1                                                                                          |
| 102736_at   | M19681   | Ccl2          | chemokine (C-C motif) ligand 2                                                                                   |
| 94940_at    | AW123316 | Mccc1         | methylcrotonoyl-Coenzyme A carboxylase 1 (alpha)                                                                 |
| 95387_f_at  | AA266467 | Sema4b        | Sema domain, immunoglobulin domain (Ig), transmembrane domain (TM) and short cytoplasmic domain, (semaphorin) 4B |
| 92525_i_at  | AW122114 | Btbd14a       | BTB (POZ) domain containing 14A                                                                                  |
| 103729_at   | M36775   | Lama1         | laminin, alpha 1                                                                                                 |
| 93141_at    | U41568   | Nr0b1         | nuclear receptor subfamily 0, group B, member 1                                                                  |
| 96135_at    | AA833425 | 3110003A17Rik | RIKEN cDNA 3110003A17 gene                                                                                       |
| 160841_at   | AW047343 | Dbp           | D site albumin promoter binding protein                                                                          |
| 103367_at   | U18975   | B4galnt1      | beta-1,4-N-acetyl-galactosaminyl transferase 1                                                                   |
| 92526_f_at  | AW122114 | Btbd14a       | BTB (POZ) domain containing 14A                                                                                  |
| 161075_at   | AI226337 | D9ErtD280e    | DNA segment, Chr 9, ERATO Doi 280, expressed                                                                     |
| 97770_s_at  | AA733372 | D6Wsu176e     | DNA segment, Chr 6, Wayne State University 176, expressed                                                        |
| 104641_f_at | AI643393 | LOC668645     | similar to gonadotropin inducible ovarian transcription factor 1                                                 |
| 94813_at    | X65128   | Gas1          | growth arrest specific 1                                                                                         |
| 94252_at    | AJ006587 | Eif2s3x       | eukaryotic translation initiation factor 2, subunit 3, structural gene X-linked                                  |

|             |          |                 |                                                                                                                                   |
|-------------|----------|-----------------|-----------------------------------------------------------------------------------------------------------------------------------|
| 101461_f_at | U06944   | Pja1            | praja1, RING-H2 motif containing                                                                                                  |
| 92457_at    | AJ132433 | E130201N16Rik   | RIKEN cDNA E130201N16 gene                                                                                                        |
| 160690_at   | AW050240 | Csnk2a1         | casein kinase II, alpha 1 polypeptide                                                                                             |
| 98008_at    | U92565   | Cx3cl1          | chemokine (C-X3-C motif) ligand 1                                                                                                 |
| 93697_at    | U63387   | Cbx4            | chromobox homolog 4 (Drosophila Pc class)                                                                                         |
| 160622_at   | AW211793 | BC011209        | cDNA sequence BC011209                                                                                                            |
| 100595_at   | AF035644 | Ptp4a2          | protein tyrosine phosphatase 4a2                                                                                                  |
| 160608_at   | AI854462 | Rab20           | RAB20, member RAS oncogene family                                                                                                 |
| 94852_at    | U09114   | Glul            | glutamate-ammonia ligase (glutamine synthetase)                                                                                   |
| 98019_at    | L22482   | Tgfb1i1         | transforming growth factor beta 1 induced transcript 1                                                                            |
| 101913_at   | AW214298 | Clcn5           | chloride channel 5                                                                                                                |
| 97013_f_at  | AW046124 | Cyba            | cytochrome b-245, alpha polypeptide                                                                                               |
| 160896_at   | D13003   | Rcn1            | reticulocalbin 1                                                                                                                  |
| 93830_at    | AI851199 | Nono            | non-POU-domain-containing, octamer binding protein                                                                                |
| 99613_at    | X51941   | Mut             | methylmalonyl-Coenzyme A mutase                                                                                                   |
| 103933_at   | U61183   | Siae            | sialic acid acetyltransferase                                                                                                     |
| 104636_at   | AJ000413 | Gstm6           | glutathione S-transferase, mu 6                                                                                                   |
| 92807_at    | X77585   | Txn1            | thioredoxin 1                                                                                                                     |
| 160233_at   | AI854743 | Ak3             | adenylate kinase 3                                                                                                                |
| 95654_at    | AF109905 | Clic1           | chloride intracellular channel 1                                                                                                  |
| 160767_at   | L42293   | Soat1           | sterol O-acyltransferase 1                                                                                                        |
| 103072_at   | M58567   | Hsd3b1          | hydroxysteroid dehydrogenase-1, delta<5>-3-beta                                                                                   |
| 160590_r_at | AI853323 | Comtd1          | catechol-O-methyltransferase domain containing 1                                                                                  |
| 95636_at    | AW123628 | 0610010K14Rik   | RIKEN cDNA 0610010K14 gene                                                                                                        |
| 104082_at   | AI848325 | Rab12           | RAB12, member RAS oncogene family                                                                                                 |
| 93750_at    | J04953   | Gsn             | gelsolin                                                                                                                          |
| 98951_at    | AI843258 | Tcf25           | transcription factor 25 (basic helix-loop-helix)                                                                                  |
| 104155_f_at | U19118   | Atf3            | activating transcription factor 3                                                                                                 |
| 96831_at    | AA755004 | Pdia5           | protein disulfide isomerase associated 5                                                                                          |
| 94818_at    | AW047223 | Ogt             | O-linked N-acetylglucosamine (GlcNAc) transferase (UDP-N-acetylglucosamine:polypeptide-N-acetylglucosaminyl transferase)          |
| 102120_f_at | C80148   | LOC675539       | similar to Hippocalcin-like protein 1 (Visinin-like protein 3) (VILIP-3) (Neural visinin-like protein 3) (NVL-3) (NVP-3)          |
| 104578_f_at | AI195392 | Actn1           | actinin, alpha 1                                                                                                                  |
| 160794_at   | AI847158 | Smyd2           | SET and MYND domain containing 2                                                                                                  |
| 101995_at   | U40930   | Sqstm1          | sequestosome 1                                                                                                                    |
| 97118_at    | AI159700 | A630007B06Rik   | RIKEN cDNA A630007B06 gene /// similar to oocyte-testis gene 1                                                                    |
| 94549_at    | AI315650 | Mfsd1           | major facilitator superfamily domain containing 1                                                                                 |
| 97267_at    | AI844771 | 6330407G11Rik   | RIKEN cDNA 6330407G11 gene                                                                                                        |
| 99933_at    | D26107   | Pvr12           | poliovirus receptor-related 2                                                                                                     |
| 103511_at   | AI843580 | Arhgap8         | Rho GTPase activating protein 8                                                                                                   |
| 93797_g_at  | AW123952 | Atp1a1          | ATPase, Na+/K+ transporting, alpha 1 polypeptide                                                                                  |
| 96057_at    | AI647493 | Aldh2           | aldehyde dehydrogenase 2, mitochondrial                                                                                           |
| 95542_at    | AI835858 | Tpm4            | tropomyosin 4                                                                                                                     |
| 99146_at    | AW124355 | Stx6            | syntaxin 6                                                                                                                        |
| 98527_at    | Z14050   | Dci             | dodecenoyl-Coenzyme A delta isomerase (3,2 trans-enoyl-Coenzyme A isomerase)                                                      |
| 93806_at    | AI848671 | Sh3bgr1         | SH3-binding domain glutamic acid-rich protein like                                                                                |
| 101948_at   | X05212   | Lamb1-1         | laminin B1 subunit 1                                                                                                              |
| 92608_at    | D88793   | Csrp1           | cysteine and glycine-rich protein 1                                                                                               |
| 93055_at    | AW049376 | Ankrd46         | ankyrin repeat domain 46                                                                                                          |
| 93088_at    | X01838   | B2m             | beta-2 microglobulin                                                                                                              |
| 101054_at   | X00496   | Cd74            | CD74 antigen (invariant polypeptide of major histocompatibility complex, class II antigen-associated)                             |
| 103697_at   | AW061234 | AW061234        | expressed sequence AW061234                                                                                                       |
| 101979_at   | AF055638 | Gadd45g         | growth arrest and DNA-damage-inducible 45 gamma                                                                                   |
| 103222_at   | L21671   | Eps8            | epidermal growth factor receptor pathway substrate 8                                                                              |
| 102779_at   | X54149   | Gadd45b         | growth arrest and DNA-damage-inducible 45 beta                                                                                    |
| 103752_r_at | AW227545 | Strn            | striatin, calmodulin binding protein                                                                                              |
| 99563_at    | AW124681 | Spin            | spindlin                                                                                                                          |
| 160202_at   | AI845108 | Atp6ap2         | ATPase, H+ transporting, lysosomal accessory protein 2                                                                            |
| 95693_at    | U51167   | Ildh2           | isocitrate dehydrogenase 2 (NADP+), mitochondrial                                                                                 |
| 104714_at   | AW125299 | Dock9 /// LOC67 | dedicator of cytokinesis 9 /// similar to Dedicator of cytokinesis protein 9 (Cdc42 guanine nucleotide exchange factor zizimin 1) |
| 161183_at   | AV244370 | Dag1            | dystroglycan 1                                                                                                                    |
| 96920_at    | AW125478 | Htra1           | HtrA serine peptidase 1                                                                                                           |
| 96524_at    | AI157060 | Cdr2l           | cerebellar degeneration-related protein 2-like                                                                                    |
| 94381_at    | L31783   | Uck1            | uridine-cytidine kinase 1                                                                                                         |
| 94881_at    | AW048937 | Cdkn1a          | cyclin-dependent kinase inhibitor 1A (P21)                                                                                        |
| 103027_at   | AA739413 | 1810030O07Rik   | RIKEN cDNA 1810030O07 gene                                                                                                        |
| 92777_at    | M32490   | Cyr61           | cysteine rich protein 61                                                                                                          |

|             |          |                 |                                                                                                                          |
|-------------|----------|-----------------|--------------------------------------------------------------------------------------------------------------------------|
| 94492_at    | AB025406 | Dstn            | destrin                                                                                                                  |
| 160319_at   | U66166   | Sparcl1         | SPARC-like 1 (mast9, hev1n)                                                                                              |
| 95064_at    | AI849271 | Acaa2           | acetyl-Coenzyme A acyltransferase 2 (mitochondrial 3-oxoacyl-Coenzyme A thiolase)                                        |
| 100983_at   | AB022053 | Prep            | prolyl endopeptidase                                                                                                     |
| 100601_at   | AF022110 | Itgb5           | integrin beta 5                                                                                                          |
| 96038_at    | AI840339 | Rnase4          | ribonuclease, RNase A family 4                                                                                           |
| 95716_at    | AW125041 | Ywhag           | 3-monooxygenase/tryptophan 5-monooxygenase activation protein, gamma polypeptide                                         |
| 101887_at   | AF045887 | Agt             | angiotensinogen (serpin peptidase inhibitor, clade A, member 8)                                                          |
| 102062_at   | U85614   | Smarcc1         | SWI/SNF related, matrix associated, actin dependent regulator of chromatin, subfamily c, member 1                        |
| 100915_at   | AW125698 | Myh9            | myosin, heavy polypeptide 9, non-muscle                                                                                  |
| 160808_at   | AI854287 | Prkab1          | protein kinase, AMP-activated, beta 1 non-catalytic subunit                                                              |
| 104386_f_at | AI843901 | Itgav           | integrin alpha V                                                                                                         |
| 161456_f_at | AV296708 | ---             | ---                                                                                                                      |
| 103611_at   | AB012693 | Cd47            | CD47 antigen (Rh-related antigen, integrin-associated signal transducer)                                                 |
| 93084_at    | U27315   | Slc25a4         | solute carrier family 25 (mitochondrial carrier, adenine nucleotide translocator), member 4                              |
| 98136_at    | AF031486 | Sms /// LOC6718 | spermine synthase /// similar to Spermine synthase (Spermidine aminopropyltransferase) (SPMSY)                           |
| 103755_at   | D89677   | Sh3d19          | SH3 domain protein D19                                                                                                   |
| 160482_at   | AI841705 | Acaa1a          | acetyl-Coenzyme A acyltransferase 1A                                                                                     |
| 104469_at   | M73748   | Pdpn            | podoplanin                                                                                                               |
| 95101_at    | AI834772 | Serinc1         | serine incorporator 1                                                                                                    |
| 97419_at    | AW060956 | Commf7 /// LOC1 | COMM domain containing 7 /// similar to COMM domain containing protein 7 /// similar to COMM domain-containing protein 7 |
| 94780_at    | AI987985 | Zbtb20          | zinc finger and BTB domain containing 20                                                                                 |
| 97541_f_at  | X00246   | H2-D1           | histocompatibility 2, D region locus 1                                                                                   |
| 93101_s_at  | U96635   | Nedd4           | neural precursor cell expressed, developmentally down-regulated gene 4                                                   |
| 94435_at    | AI839117 | D10Erd438e      | DNA segment, Chr 10, ERATO Doi 438, expressed                                                                            |
| 99930_s_at  | U57325   | Psen2           | presenilin 2                                                                                                             |
| 96633_s_at  | AA529583 | Morf4l2         | mortality factor 4 like 2                                                                                                |
| 93875_at    | M12571   | Hspa1a          | heat shock protein 1A                                                                                                    |
| 97360_at    | AI841689 | Cmtm3           | CKLF-like MARVEL transmembrane domain containing 3                                                                       |
| 104494_at   | AI642098 | C820004L04Rik   | RIKEN cDNA C820004L04 gene                                                                                               |
| 104719_at   | AI182203 | Slc12a7         | solute carrier family 12, member 7                                                                                       |
| 98083_at    | AW049031 | Klf6            | Kruppel-like factor 6                                                                                                    |
| 92348_at    | AI841022 | Thra            | thyroid hormone receptor alpha                                                                                           |
| 101590_at   | AI747194 | Lamp2           | lysosomal membrane glycoprotein 2                                                                                        |
| 92513_at    | AJ002636 | Stag2           | stromal antigen 2                                                                                                        |
| 93318_at    | U91513   | Ninj1           | ninjurin 1                                                                                                               |
| 95531_at    | AI854771 | Amot            | angiominin                                                                                                               |
| 94977_at    | X15373   | Itpr1           | inositol 1,4,5-triphosphate receptor 1                                                                                   |
| 98588_at    | Z11774   | Fah             | fumarylacetoacetate hydrolase                                                                                            |
| 93364_at    | X59990   | Ctnna1          | catenin (cadherin associated protein), alpha 1                                                                           |
| 104728_at   | L27439   | Pros1           | protein S (alpha)                                                                                                        |
| 99081_at    | AF010254 | Serping1        | serine (or cysteine) peptidase inhibitor, clade G, member 1                                                              |
| 94432_at    | AI117157 | St6gal1         | beta galactoside alpha 2,6 sialyltransferase 1                                                                           |
| 96295_at    | AW122030 | Psat1           | phosphoserine aminotransferase 1                                                                                         |
| 94019_at    | AI852534 | ---             | ---                                                                                                                      |
| 94297_at    | U16959   | Fkbp5           | FK506 binding protein 5                                                                                                  |
| 103560_at   | AW124401 | Lysmd2          | LysM, putative peptidoglycan-binding, domain containing 2                                                                |
| 160877_at   | AA647799 | Ogn             | osteoglycin                                                                                                              |
| 103076_at   | AW046093 | Chmp5           | chromatin modifying protein 5                                                                                            |
| 103369_at   | AW049142 | 9430029L20Rik   | RIKEN cDNA 9430029L20 gene                                                                                               |
| 97990_at    | D85923   | Myh11           | myosin, heavy polypeptide 11, smooth muscle                                                                              |
| 97980_at    | L38423   | Ltbr            | lymphotoxin B receptor                                                                                                   |
| 93039_at    | AF009513 | Pgcp            | plasma glutamate carboxypeptidase                                                                                        |
| 100879_at   | AF093775 | Actn3           | actinin alpha 3                                                                                                          |
| 100093_at   | X69025   | Pctk1           | PCTAIRE-motif protein kinase 1                                                                                           |
| 100050_at   | M31885   | Id1             | inhibitor of DNA binding 1                                                                                               |
| 100607_at   | AF026124 | Pld3            | phospholipase D family, member 3                                                                                         |
| 161648_at   | AV087550 | Crry            | complement receptor related protein                                                                                      |
| 93078_at    | X04653   | Ly6a            | lymphocyte antigen 6 complex, locus A                                                                                    |
| 97255_at    | AW061318 | Cugbp2          | CUG triplet repeat, RNA binding protein 2                                                                                |
| 93985_at    | AW120868 | Tiparp          | TCDD-inducible poly(ADP-ribose) polymerase                                                                               |
| 160131_at   | AI854404 | Amotl2          | angiominin like 2                                                                                                        |
| 161013_f_at | AI596360 | Spsb1           | spA/ryanodine receptor domain and SOCS box containing 1                                                                  |
| 97829_at    | AI838053 | Cdipt           | CDP-diacylglycerol--inositol 3-phosphatidyltransferase (phosphatidylinositol synthase)                                   |
| 95887_at    | AI451008 | Soat1           | sterol O-acyltransferase 1                                                                                               |
| 103816_at   | U89915   | F11r            | F11 receptor                                                                                                             |

|             |          |               |                                                                                                                                        |
|-------------|----------|---------------|----------------------------------------------------------------------------------------------------------------------------------------|
| 101571_g_at | X76066   | Igfbp4        | insulin-like growth factor binding protein 4                                                                                           |
| 99549_at    | D31951   | Ogn           | osteoglycin                                                                                                                            |
| 95082_at    | AI842277 | Igfbp3        | insulin-like growth factor binding protein 3                                                                                           |
| 98988_at    | AA614971 | Nfkbiz        | nuclear factor of kappa light polypeptide gene enhancer in B-cells inhibitor, zeta                                                     |
| 92633_at    | AJ242663 | Ctsz          | cathepsin Z                                                                                                                            |
| 93045_at    | L28836   | Abcd3         | ATP-binding cassette, sub-family D (ALD), member 3                                                                                     |
| 102815_at   | U65986   | Anxa11        | annexin A11                                                                                                                            |
| 104063_at   | AI840130 | Tom11l        | target of myb1-like 1 (chicken)                                                                                                        |
| 160975_at   | AI504338 | ---           | Transcribed locus                                                                                                                      |
| 101585_at   | AF042491 | Pgrmc1        | progesterone receptor membrane component 1                                                                                             |
| 160344_at   | AB021289 | Npc2          | Niemann Pick type C2                                                                                                                   |
| 104725_at   | AW060401 | Rhoq          | ras homolog gene family, member Q                                                                                                      |
| 161666_f_at | AV138783 | Gadd45b       | growth arrest and DNA-damage-inducible 45 beta                                                                                         |
| 103100_at   | AI788543 | Wwtr1         | WW domain containing transcription regulator 1                                                                                         |
| 92374_at    | AW120691 | Adora1        | adenosine A1 receptor                                                                                                                  |
| 104735_at   | AI842065 | Kctd12        | potassium channel tetramerisation domain containing 12                                                                                 |
| 93379_at    | Y09079   | Dpysl4        | dihydropyrimidinase-like 4                                                                                                             |
| 160081_at   | AW045418 | Rpl36a        | ribosomal protein L36a                                                                                                                 |
| 102105_f_at | AI840733 | Ptgds         | prostaglandin D2 synthase (brain)                                                                                                      |
| 98596_s_at  | Y15003   | St3gal5       | ST3 beta-galactoside alpha-2,3-sialyltransferase 5                                                                                     |
| 95364_at    | M80631   | Gna14         | guanine nucleotide binding protein, alpha 14                                                                                           |
| 104235_at   | AW122882 | Unc84b        | unc-84 homolog B (C. elegans)                                                                                                          |
| 160617_at   | AW125783 | Klf13         | Kruppel-like factor 13                                                                                                                 |
| 92848_at    | X64837   | Oat           | ornithine aminotransferase                                                                                                             |
| 94951_at    | AI853260 | Las1l         | LAS1-like (S. cerevisiae)                                                                                                              |
| 95591_at    | AI843335 | Extl3         | exostosin (multiple)-like 3                                                                                                            |
| 160486_at   | AI848822 | Ccdc28b       | coiled coil domain containing 28B                                                                                                      |
| 96596_at    | U52073   | Ndr1          | N-myc downstream regulated gene 1 /// N-myc downstream regulated-like                                                                  |
| 92398_at    | AI848723 | Vps37b        | vacuolar protein sorting 37B (yeast)                                                                                                   |
| 95045_at    | AI844469 | 0610012D09Rik | RIKEN cDNA 0610012D09 gene                                                                                                             |
| 93100_at    | X13297   | Acta2         | actin, alpha 2, smooth muscle, aorta                                                                                                   |
| 160479_at   | M29394   | Cat           | catalase                                                                                                                               |
| 94439_at    | AW124363 | Osbpl1l       | oxysterol binding protein-like 11                                                                                                      |
| 160930_at   | AW123983 | Sacm1l        | SAC1 (suppressor of actin mutations 1, homolog)-like (S. cerevisiae)                                                                   |
| 160573_at   | AA645537 | Hccs          | holocytochrome c synthetase                                                                                                            |
| 92590_at    | U12791   | Hmgcs2        | 3-hydroxy-3-methylglutaryl-Coenzyme A synthase 2                                                                                       |
| 93496_at    | AI852098 | Elovl5        | ELOVL family member 5, elongation of long chain fatty acids (yeast)                                                                    |
| 92831_at    | AI846308 | Sfxn1         | sideroflexin 1                                                                                                                         |
| 101214_f_at | M32599   | LOC14433      | /// LO similar to glyceraldehyde-3-phosphate dehydrogenase /// similar to glyceraldehyde-3-phosphate dehydrogenase /// cDNA sequence . |
| 100780_at   | M73436   | Rps4x         | ribosomal protein S4, X-linked                                                                                                         |
| 95940_f_at  | AW047237 | BC052328      | cDNA sequence BC052328                                                                                                                 |
| 93025_at    | AI835257 | Ndfip1        | Nedd4 family interacting protein 1                                                                                                     |
| 103247_at   | AF079366 | Mpp3          | membrane protein, palmitoylated 3 (MAGUK p55 subfamily member 3)                                                                       |
| 160396_at   | AW121580 | Lass2         | longevity assurance homolog 2 (S. cerevisiae)                                                                                          |
| 103884_at   | AI850335 | Atpbd1c       | ATP binding domain 1 family, member C                                                                                                  |
| 97160_at    | X04017   | Sparc         | secreted acidic cysteine rich glycoprotein                                                                                             |
| 93294_at    | M70642   | Ctgf          | connective tissue growth factor                                                                                                        |
| 160065_s_at | AI837625 | Csrp1         | cysteine and glycine-rich protein 1                                                                                                    |
| 94979_at    | AW121624 | BC018507      | cDNA sequence BC018507                                                                                                                 |
| 160358_at   | AI847784 | Cd34          | CD34 antigen                                                                                                                           |
| 101015_s_at | AF013486 | Ifnar2        | interferon (alpha and beta) receptor 2                                                                                                 |
| 96703_at    | AB029448 | Maged1        | melanoma antigen, family D, 1                                                                                                          |
| 160385_at   | AI851345 | Gcsh          | glycine cleavage system protein H (aminomethyl carrier)                                                                                |
| 97308_at    | AI835409 | Tmem11        | transmembrane protein 11                                                                                                               |
| 100342_i_at | M28729   | Tuba1         | tubulin, alpha 1                                                                                                                       |
| 97247_at    | AW124778 | Isoc1         | isochorismatase domain containing 1                                                                                                    |
| 95886_g_at  | AA177826 | Crebbp        | CREB binding protein                                                                                                                   |
| 100331_g_at | AF032714 | Prdx2         | peroxiredoxin 2                                                                                                                        |
| 93139_at    | AI504310 | Sdsl          | serine dehydratase-like                                                                                                                |
| 103955_at   | AW050325 | Cryl1         | crystallin, lamda 1                                                                                                                    |
| 104488_at   | AI852101 | 5730407K14Rik | RIKEN cDNA 5730407K14 gene                                                                                                             |
| 95511_at    | X69902   | Itga6         | integrin alpha 6                                                                                                                       |
| 95135_at    | AI844396 | Mid1ip1       | Mid1 interacting protein 1 (gastrulation specific G12-like (zebrafish))                                                                |
| 160511_at   | L12029   | Cxcl12        | chemokine (C-X-C motif) ligand 12                                                                                                      |
| 94004_at    | Z19543   | Cnn2          | calponin 2                                                                                                                             |
| 162302_f_at | AV035020 | Folr1         | folate receptor 1 (adult)                                                                                                              |

|             |          |                 |                                                                                                |
|-------------|----------|-----------------|------------------------------------------------------------------------------------------------|
| 98045_s_at  | U18869   | Dab2            | disabled homolog 2 (Drosophila)                                                                |
| 92968_at    | D87902   | Arf5            | ADP-ribosylation factor 5                                                                      |
| 104092_at   | AW124926 | Usp48 /// LOC67 | ubiquitin specific peptidase 48 /// hypothetical protein LOC674195                             |
| 93482_at    | AI117835 | Mylk            | myosin, light polypeptide kinase                                                               |
| 93780_at    | AW060827 | Them2           | thioesterase superfamily member 2                                                              |
| 104014_at   | Y12650   | Hfe             | hemochromatosis                                                                                |
| 97819_at    | AI843119 | Gsto1           | glutathione S-transferase omega 1                                                              |
| 97817_at    | AW121136 | Cdc42se1        | CDC42 small effector 1                                                                         |
| 95758_at    | M26270   | Scd2            | stearoyl-Coenzyme A desaturase 2                                                               |
| 98579_at    | M28845   | Egr1            | early growth response 1                                                                        |
| 97948_at    | M26391   | Rb1             | retinoblastoma 1                                                                               |
| 93140_at    | X99946   | Tsx             | testis specific X-linked gene                                                                  |
| 97450_s_at  | AA986258 | Aldh7a1         | aldehyde dehydrogenase family 7, member A1                                                     |
| 96007_at    | AI835359 | Ssr3            | signal sequence receptor, gamma                                                                |
| 104701_at   | Y07836   | Bhlhb2          | basic helix-loop-helix domain containing, class B2                                             |
| 160453_at   | L21707   | Ryk             | receptor-like tyrosine kinase                                                                  |
| 102054_at   | AB011370 | Ankyf1          | ankyrin repeat and FYVE domain containing 1                                                    |
| 93590_at    | AI844370 | Ndst1           | N-deacetylase/N-sulfotransferase (heparan glucosaminyl) 1                                      |
| 97949_at    | M16238   | Fgl2            | fibrinogen-like protein 2                                                                      |
| 160653_at   | AF043249 | Tomm40          | translocase of outer mitochondrial membrane 40 homolog (yeast)                                 |
| 102255_at   | AB015978 | Osmr            | oncostatin M receptor                                                                          |
| 160184_at   | AA815795 | 1200007D18Rik   | RIKEN cDNA 1200007D18 gene                                                                     |
| 92851_at    | U49430   | Cp              | ceruloplasmin                                                                                  |
| 104098_at   | L28835   | Pxmp2           | peroxisomal membrane protein 2                                                                 |
| 98533_at    | AI854779 | Cyb5            | cytochrome b-5                                                                                 |
| 95488_at    | AW045756 | BC010304        | cDNA sequence BC010304                                                                         |
| 95026_at    | AW047688 | Retsat          | retinol saturase (all trans retinol 13,14 reductase)                                           |
| 94870_f_at  | AW124226 | Sar1b           | SAR1 gene homolog B (S. cerevisiae)                                                            |
| 160417_at   | U86090   | Kif5b           | kinesin family member 5B                                                                       |
| 101441_i_at | AF031127 | Itp2c           | inositol 1,4,5-triphosphate receptor 2                                                         |
| 96283_at    | AI849180 | Itm2c           | integral membrane protein 2C                                                                   |
| 103643_at   | AI844784 | Zdhhc16         | zinc finger, DHHC domain containing 16                                                         |
| 96004_at    | AI851641 | Sri             | sorcini                                                                                        |
| 103288_at   | AF053062 | Nrip1           | nuclear receptor interacting protein 1                                                         |
| 94811_s_at  | AJ002366 | Gtf2h1 /// Ndn  | general transcription factor II H, polypeptide 1 /// necdin                                    |
| 93731_at    | AF090334 | Fkbp9           | FK506 binding protein 9                                                                        |
| 160921_at   | AW125884 | Acss1           | acyl-CoA synthetase short-chain family member 1                                                |
| 93328_at    | X57437   | Hdc             | histidine decarboxylase                                                                        |
| 104154_at   | AB021961 | Trp53           | transformation related protein 53                                                              |
| 93116_at    | J02626   | Prkacb          | protein kinase, cAMP dependent, catalytic, beta                                                |
| 98127_at    | U16741   | Capza2          | capping protein (actin filament) muscle Z-line, alpha 2                                        |
| 160764_at   | AW046376 | Fbxw11          | F-box and WD-40 domain protein 11                                                              |
| 103040_at   | AI837100 | Cd83            | CD83 antigen                                                                                   |
| 104125_at   | AA763673 | Rnf12           | ring finger protein 12                                                                         |
| 104516_at   | U82758   | Cldn5           | claudin 5                                                                                      |
| 160547_s_at | AI839138 | Txnip           | thioredoxin interacting protein                                                                |
| 99040_at    | X66119   | Slc6a4          | solute carrier family 6 (neurotransmitter transporter, serotonin), member 4                    |
| 97224_at    | AI851394 | Pnrc1           | proline-rich nuclear receptor coactivator 1                                                    |
| 93600_at    | AJ011565 | Leprot          | leptin receptor overlapping transcript                                                         |
| 160911_at   | Z11574   | Sos1            | Son of sevenless homolog 1 (Drosophila)                                                        |
| 93081_at    | U35142   | Rbbp7           | retinoblastoma binding protein 7                                                               |
| 160564_at   | X81627   | Lcn2            | lipocalin 2                                                                                    |
| 94863_r_at  | AI850000 | Dynlrb1         | dynein light chain roadblock-type 1                                                            |
| 93574_at    | AF036164 | Serpinf1        | serine (or cysteine) peptidase inhibitor, clade F, member 1                                    |
| 104277_at   | AI834815 | Alg2            | asparagine-linked glycosylation 2 homolog (yeast, alpha-1,3-mannosyltransferase)               |
| 96978_at    | AB025258 | Syt14           | synaptotagmin-like 4                                                                           |
| 94485_at    | AI840013 | Peci            | peroxisomal delta3, delta2-enoyl-Coenzyme A isomerase                                          |
| 104139_at   | U16162   | P4ha1           | procollagen-proline, 2-oxoglutarate 4-dioxygenase (proline 4-hydroxylase), alpha 1 polypeptide |
| 160707_at   | AI854081 | D10Wsu102e      | DNA segment, Chr 10, Wayne State University 102, expressed                                     |
| 101045_at   | U96116   | Hadh2           | hydroxyacyl-Coenzyme A dehydrogenase type II                                                   |
| 97528_at    | AF022811 | Cnih            | cornichon homolog (Drosophila)                                                                 |
| 96896_at    | AW214159 | Actr2           | ARP2 actin-related protein 2 homolog (yeast)                                                   |
| 96704_at    | AF058798 | Sfn             | stratifin                                                                                      |
| 102248_f_at | Y17138   | Cask            | calcium/calmodulin-dependent serine protein kinase (MAGUK family)                              |
| 98966_at    | L42996   | Dbt             | dihydrolipoamide branched chain transacylase E2                                                |
| 96271_at    | AA914105 | Tmem123         | transmembrane protein 123                                                                      |

|             |          |                  |                                                                                                                                               |
|-------------|----------|------------------|-----------------------------------------------------------------------------------------------------------------------------------------------|
| 102350_at   | AI836109 | Adprhl2          | ADP-ribosylhydrolase like 2                                                                                                                   |
| 101495_at   | X59047   | Cd81             | CD 81 antigen                                                                                                                                 |
| 99524_at    | AF004666 | Slc8a1           | solute carrier family 8 (sodium/calcium exchanger), member 1                                                                                  |
| 98595_at    | U56773   | Irak1            | interleukin-1 receptor-associated kinase 1                                                                                                    |
| 101089_at   | AF002283 | Pdlim3           | PDZ and LIM domain 3                                                                                                                          |
| 103685_at   | AI839232 | ---              | Transcribed locus                                                                                                                             |
| 96925_at    | AW122429 | Glt25d1          | glycosyltransferase 25 domain containing 1                                                                                                    |
| 104326_at   | AI838951 | Adpgk            | ADP-dependent glucokinase                                                                                                                     |
| 103050_at   | AF035717 | Tcf21            | transcription factor 21                                                                                                                       |
| 104672_at   | U68058   | Frzb             | frizzled-related protein                                                                                                                      |
| 96774_at    | AW047139 | Plekhc1          | pleckstrin homology domain containing, family C (with FERM domain) member 1                                                                   |
| 161703_f_at | AV003419 | Anxa1            | annexin A1                                                                                                                                    |
| 160502_at   | AF084524 | Creg1            | cellular repressor of E1A-stimulated genes 1                                                                                                  |
| 161657_f_at | AV105022 | Rp110 /// LOC234 | ribosomal protein 10 /// similar to ribosomal protein L10 /// similar to ribosomal protein L10 /// similar to ribosomal protein L10 /// simil |
| 95586_at    | AF089751 | P2rx4            | purinergic receptor P2X, ligand-gated ion channel 4                                                                                           |
| 99514_at    | AI835443 | Bmyc             | brain expressed myelocytomatosis oncogene                                                                                                     |
| 100522_s_at | U92454   | Wbp5             | WW domain binding protein 5                                                                                                                   |
| 96747_at    | AW121294 | Rhou             | ras homolog gene family, member U                                                                                                             |
| 104598_at   | X61940   | Dusp1            | dual specificity phosphatase 1                                                                                                                |
| 96632_at    | AB025049 | Morf4l2 /// LOC4 | mortality factor 4 like 2 /// similar to Mortality factor 4-like protein 2 (MORF-related gene X protein) (Transcription factor-like protein M |
| 94935_at    | AI843739 | Tbl1x            | Transducin (beta)-like 1 X-linked                                                                                                             |
| 100548_at   | L31958   | Pea15            | phosphoprotein enriched in astrocytes 15                                                                                                      |
| 93278_at    | M91458   | Scp2             | sterol carrier protein 2, liver                                                                                                               |
| 100569_at   | M14044   | Anxa2            | annexin A2                                                                                                                                    |
| 98131_at    | D78646   | Cryz             | crystallin, zeta                                                                                                                              |
| 93360_at    | AF007267 | Pmm1             | phosphomannomutase 1                                                                                                                          |
| 100074_at   | AW046723 | Tmed9            | transmembrane emp24 protein transport domain containing 9                                                                                     |
| 103499_at   | AI843063 | Vwf              | Von Willebrand factor homolog                                                                                                                 |
| 161361_s_at | AV213431 | Tnnt1            | troponin T1, skeletal, slow                                                                                                                   |
| 94833_at    | M91380   | Fstl1            | folliculin-like 1                                                                                                                             |
| 102378_at   | U02487   | Sspn             | sarcospan                                                                                                                                     |
| 102859_at   | AW121304 | Reep1            | receptor accessory protein 1                                                                                                                  |
| 102425_at   | U61362   | Tle1             | transducin-like enhancer of split 1, homolog of Drosophila E(spl)                                                                             |
| 103052_r_at | X76653   | Nr2f2            | nuclear receptor subfamily 2, group F, member 2                                                                                               |
| 98495_at    | AI846906 | 5033414D02Rik    | RIKEN cDNA 5033414D02 gene                                                                                                                    |
| 96829_at    | AW047083 | D19Wsu162e       | DNA segment, Chr 19, Wayne State University 162, expressed                                                                                    |
| 99960_at    | U18310   | Map2k4           | mitogen activated protein kinase kinase 4                                                                                                     |
| 96238_at    | AI853996 | ---              | ---                                                                                                                                           |
| 104256_at   | AI120844 | Pscdbp           | pleckstrin homology, Sec7 and coiled-coil domains, binding protein                                                                            |
| 160444_at   | AI848397 | Pigx             | phosphatidylinositol glycan, class X                                                                                                          |
| 161380_f_at | AV245978 | Rab31            | RAB31, member RAS oncogene family                                                                                                             |
| 96426_at    | U38967   | Tmsb4x           | thymosin, beta 4, X chromosome                                                                                                                |
| 92614_at    | M60523   | Id3              | inhibitor of DNA binding 3                                                                                                                    |
| 101001_at   | AI647612 | Gpr177           | G protein-coupled receptor 177                                                                                                                |
| 162262_f_at | AV357306 | Gyg              | glycogenin                                                                                                                                    |
| 97211_at    | AI747444 | Armcx2           | armadillo repeat containing, X-linked 2                                                                                                       |
| 160726_at   | U44940   | Qk               | quaking                                                                                                                                       |
| 104056_at   | AI573367 | D16Bwg1543e      | DNA segment, Chr 16, Brigham & Women's Genetics 1543 expressed                                                                                |
| 97689_at    | M26071   | F3               | coagulation factor III                                                                                                                        |
| 100593_at   | L47600   | Tnnt2            | troponin T2, cardiac                                                                                                                          |
| 96849_at    | AA655369 | Timm8a1          | translocase of inner mitochondrial membrane 8 homolog a1 (yeast)                                                                              |
| 98132_at    | X01756   | Cycs /// LOC670  | cytochrome c, somatic /// similar to Cytochrome c, somatic /// similar to Cytochrome c, somatic                                               |
| 100702_at   | U85644   | Shbg             | sex hormone binding globulin                                                                                                                  |
| 160611_at   | AA212964 | Cyp4v3           | cytochrome P450, family 4, subfamily v, polypeptide 3                                                                                         |
| 94399_at    | AI843172 | Inpp5b           | inositol polyphosphate-5-phosphatase B                                                                                                        |
| 100123_f_at | X15202   | Itgb1            | integrin beta 1 (fibronectin receptor beta)                                                                                                   |
| 95084_f_at  | AI844995 | Grhpr            | glyoxylate reductase/hydroxypyruvate reductase                                                                                                |
| 103435_at   | AW045910 | 9430080K19Rik    | RIKEN cDNA 9430080K19 gene                                                                                                                    |
| 95020_at    | AI848868 | Cd47             | CD47 antigen (Rh-related antigen, integrin-associated signal transducer)                                                                      |
| 100581_at   | U59807   | Cstb             | cystatin B                                                                                                                                    |
| 160968_at   | AI390412 | Aard             | alanine and arginine rich domain containing protein                                                                                           |
| 104538_at   | AB001607 | Ptgis            | prostaglandin I2 (prostacyclin) synthase                                                                                                      |
| 104741_at   | AI843023 | Zdhhc9           | zinc finger, DHHC domain containing 9                                                                                                         |
| 102826_at   | J05663   | Akr1b7           | aldo-keto reductase family 1, member B7                                                                                                       |
| 104053_at   | AA110657 | Trio             | triple functional domain (PTPRF interacting)                                                                                                  |
| 160645_at   | U88908   | Birc3            | baculoviral IAP repeat-containing 3                                                                                                           |

|             |          |                      |                                                                                                                                                            |
|-------------|----------|----------------------|------------------------------------------------------------------------------------------------------------------------------------------------------------|
| 160091_at   | AW125401 | Pgam1                | LOC66 phosphoglycerate mutase 1 /// similar to Phosphoglycerate mutase 1 (Phosphoglycerate mutase isozyme B) (PGAM-B) (BPG-depen                           |
| 104083_at   | AI853217 | Cdh5                 | cadherin 5                                                                                                                                                 |
| 160805_s_at | AB025354 | Mpdu1                | mannose-P-dolichol utilization defect 1                                                                                                                    |
| 162269_at   | AV363431 | Smyd2                | SET and MYND domain containing 2                                                                                                                           |
| 95029_at    | AW046747 | Atp13a1              | ATPase type 13A1                                                                                                                                           |
| 98065_at    | AI837679 | Ormdl3               | ORM1-like 3 (S. cerevisiae)                                                                                                                                |
| 160245_at   | AW045564 | 1110034O07Rik        | RIKEN cDNA 1110034O07 gene                                                                                                                                 |
| 92893_at    | D90173   | Nfia                 | nuclear factor I/A                                                                                                                                         |
| 96900_at    | AW125480 | Ndg2                 | Nur77 downstream gene 2                                                                                                                                    |
| 93009_at    | J04696   | Gstm2                | glutathione S-transferase, mu 2                                                                                                                            |
| 101516_at   | U60473   | Cd59a                | CD59a antigen                                                                                                                                              |
| 97424_at    | AW049647 | Arl6ip5              | ADP-ribosylation factor-like 6 interacting protein 5                                                                                                       |
| 95070_at    | AW125874 | Nars                 | asparaginyl-tRNA synthetase                                                                                                                                |
| 104525_at   | AW124812 | Ppm1m                | protein phosphatase 1M                                                                                                                                     |
| 99329_at    | AF022908 | Abcc1                | ATP-binding cassette, sub-family C (CFTR/MRP), member 1                                                                                                    |
| 160373_i_at | AI839175 | Sdpr                 | serum deprivation response                                                                                                                                 |
| 100935_at   | U43548   | Mlx                  | MAX-like protein X                                                                                                                                         |
| 102644_at   | U13371   | Mdfic                | MyoD family inhibitor domain containing                                                                                                                    |
| 95286_at    | D14077   | Clu                  | clusterin                                                                                                                                                  |
| 99156_at    | AI853370 | Pdzd11               | PDZ domain containing 11                                                                                                                                   |
| 99076_at    | U09504   | Nr1d2                | nuclear receptor subfamily 1, group D, member 2                                                                                                            |
| 92256_at    | AI853714 | Ctsb                 | cathepsin B                                                                                                                                                |
| 104605_at   | AW047554 | Adipor2              | adiponectin receptor 2                                                                                                                                     |
| 94778_at    | U96401   | Aldh1a7              | aldehyde dehydrogenase family 1, subfamily A7                                                                                                              |
| 96228_at    | AW121619 | Cyp11a1              | cytochrome P450, family 11, subfamily a, polypeptide 1                                                                                                     |
| 95883_at    | AW048355 | Phf17                | PHD finger protein 17                                                                                                                                      |
| 103911_at   | AI851573 | Sumf1                | sulfatase modifying factor 1                                                                                                                               |
| 94214_at    | X14961   | Fabp3                | fatty acid binding protein 3, muscle and heart                                                                                                             |
| 101408_at   | AF010499 | Gamt                 | guanidinoacetate methyltransferase                                                                                                                         |
| 93983_at    | AI846382 | Der1                 | Der1-like domain family, member 1                                                                                                                          |
| 92829_at    | U09659   | Hspe1                | heat shock protein 1 (chaperonin 10)                                                                                                                       |
| 98342_at    | M93980   | Rpl10                | ribosomal protein 10                                                                                                                                       |
| 160824_at   | AI852741 | Rreb1                | ras responsive element binding protein 1                                                                                                                   |
| 104501_at   | AI849048 | Vapb                 | vesicle-associated membrane protein, associated protein B and C                                                                                            |
| 99445_at    | AW047012 | Slc44a2              | solute carrier family 44, member 2                                                                                                                         |
| 97911_at    | AI835950 | 0910001L09Rik        | RIKEN cDNA 0910001L09 gene                                                                                                                                 |
| 103091_at   | M83380   | Relb                 | avian reticuloendotheliosis viral (v-rel) oncogene related B                                                                                               |
| 92189_at    | AI846017 | Ufm1                 | ubiquitin-fold modifier 1                                                                                                                                  |
| 104579_r_at | AI195392 | Actn1                | actinin, alpha 1                                                                                                                                           |
| 98550_at    | AI854006 | Set                  | SET translocation                                                                                                                                          |
| 160519_at   | U26437   | Timp3                | tissue inhibitor of metalloproteinase 3                                                                                                                    |
| 97420_at    | AW230891 | Lrg1                 | leucine-rich alpha-2-glycoprotein 1                                                                                                                        |
| 101465_at   | U06924   | Stat1                | signal transducer and activator of transcription 1                                                                                                         |
| 104399_at   | AI850965 | Cstf2                | cleavage stimulation factor, 3' pre-RNA subunit 2                                                                                                          |
| 94289_r_at  | AI851574 | Maged2               | melanoma antigen, family D, 2                                                                                                                              |
| 99872_s_at  | L39879   | Ftl1 /// Ftl2 /// LO | ferritin light chain 1 /// ferritin light chain 2 /// similar to Ferritin light chain 1 (Ferritin L subunit 1) /// similar to Ferritin light chain 1 (Ferr |
| 92857_at    | AI853960 | Rpl22                | ribosomal protein L22                                                                                                                                      |
| 103899_at   | AA690863 | Atp11a               | ATPase, class VI, type 11A                                                                                                                                 |
| 160718_at   | AJ012475 | Capn7                | calpain 7                                                                                                                                                  |
| 97429_at    | AW048113 | Snrk                 | SNF related kinase                                                                                                                                         |
| 94998_at    | AI838452 | Rala                 | v-ral simian leukemia viral oncogene homolog A (ras related)                                                                                               |
| 92216_at    | AF015260 | Smad7                | MAD homolog 7 (Drosophila)                                                                                                                                 |
| 92562_at    | U70475   | Nfe2l2               | nuclear factor, erythroid derived 2, like 2                                                                                                                |
| 95453_f_at  | AF087687 | S100a1               | S100 calcium binding protein A1                                                                                                                            |
| 97773_at    | AI173145 | Cd34                 | CD34 antigen                                                                                                                                               |
| 99528_at    | AW122015 | Spin                 | spindlin                                                                                                                                                   |
| 103289_at   | AB013874 | Corin                | corin                                                                                                                                                      |
| 94768_at    | D37790   | Rad21                | RAD21 homolog (S. pombe)                                                                                                                                   |
| 99502_at    | U80078   | Zfp148               | zinc finger protein 148                                                                                                                                    |
| 95590_at    | AA615951 | Alg5                 | asparagine-linked glycosylation 5 homolog (yeast, dolichyl-phosphate beta-glycosyltransferase)                                                             |
| 102123_at   | Z31689   | Lip1                 | Lysosomal acid lipase 1                                                                                                                                    |
| 97358_at    | AI851356 | Lphn1                | latrophilin 1                                                                                                                                              |
| 100020_at   | J04036   | Slc4a2               | solute carrier family 4 (anion exchanger), member 2                                                                                                        |
| 100435_at   | U13370   | Edg2                 | endothelial differentiation, lysophosphatidic acid G-protein-coupled receptor, 2                                                                           |
| 161073_at   | AI846304 | C630002B14Rik        | RIKEN cDNA C630002B14 gene                                                                                                                                 |
| 93324_at    | M58566   | Zfp361               | zinc finger protein 36, C3H type-like 1                                                                                                                    |

|             |          |                   |                                                                                                                                    |
|-------------|----------|-------------------|------------------------------------------------------------------------------------------------------------------------------------|
| 94902_at    | U38261   | Sod3              | superoxide dismutase 3, extracellular                                                                                              |
| 94973_at    | AA840126 | Jmjd1b            | jumonji domain containing 1B                                                                                                       |
| 96738_at    | U41765   | Adam9             | a disintegrin and metallopeptidase domain 9 (meltrin gamma)                                                                        |
| 93351_at    | U44389   | Hpgd              | hydroxyprostaglandin dehydrogenase 15 (NAD)                                                                                        |
| 94448_at    | AJ006289 | Bcl10             | B-cell leukemia/lymphoma 10                                                                                                        |
| 93066_at    | D16195   | Gm                | granulin                                                                                                                           |
| 92539_at    | M16465   | S100a10           | S100 calcium binding protein A10 (calpactin)                                                                                       |
| 103842_at   | AJ007376 | Ddx3y             | DEAD (Asp-Glu-Ala-Asp) box polypeptide 3, Y-linked                                                                                 |
| 97866_at    | AI842858 | 2510049I19Rik     | RIKEN cDNA 2510049I19 gene                                                                                                         |
| 98038_at    | AF022465 | Hmgb3             | high mobility group box 3                                                                                                          |
| 92738_at    | D49921   | Gdnf              | glial cell line derived neurotrophic factor                                                                                        |
| 97803_at    | U38196   | Mpp1              | membrane protein, palmitoylated                                                                                                    |
| 160532_at   | M22479   | Tpm1              | tropomyosin 1, alpha                                                                                                               |
| 104109_at   | AI853773 | Fbxo21            | F-box only protein 21                                                                                                              |
| 93988_at    | AI836676 | Psm1              | proteasome (prosome, macropain) subunit, alpha type 7                                                                              |
| 100068_at   | M74570   | Aldh1a1           | aldehyde dehydrogenase family 1, subfamily A1                                                                                      |
| 100475_at   | D63902   | Trim25            | tripartite motif protein 25                                                                                                        |
| 93017_at    | AF077527 | ---               | ---                                                                                                                                |
| 102095_f_at | AI842145 | Spock2            | sparc/osteonectin, cwcv and kazal-like domains proteoglycan 2                                                                      |
| 94057_g_at  | M21285   | Scd1              | stearoyl-Coenzyme A desaturase 1                                                                                                   |
| 97535_at    | D87661   | Ywhah             | tyrosine 3-monooxygenase/tryptophan 5-monooxygenase activation protein, eta polypeptide                                            |
| 97386_at    | AI853294 | Zfp703            | zinc finger protein 703                                                                                                            |
| 100483_at   | M89641   | Ilnar1            | interferon (alpha and beta) receptor 1                                                                                             |
| 162172_f_at | AV365271 | Nedd4             | neural precursor cell expressed, developmentally down-regulated gene 4                                                             |
| 92830_s_at  | X14678   | Zfp36             | zinc finger protein 36                                                                                                             |
| 161808_f_at | AV371846 | Evl               | Ena-vasodilator stimulated phosphoprotein                                                                                          |
| 160137_at   | AW260308 | B3gnt2            | UDP-GlcNAc:betaGal beta-1,3-N-acetylglucosaminyltransferase 2                                                                      |
| 99491_at    | U53696   | Il10rb            | interleukin 10 receptor, beta                                                                                                      |
| 104188_at   | AI853703 | Notch2            | Notch gene homolog 2 (Drosophila)                                                                                                  |
| 92770_at    | X66449   | S100a6            | S100 calcium binding protein A6 (calcyclin)                                                                                        |
| 96088_at    | AB033921 | Ndr2              | N-myc downstream regulated gene 2                                                                                                  |
| 160126_at   | AF082526 | Map2k1ip1         | mitogen-activated protein kinase kinase 1 interacting protein 1                                                                    |
| 96336_at    | AI844626 | Gatm              | glycine amidinotransferase (L-arginine:glycine amidinotransferase)                                                                 |
| 93021_at    | AA790008 | Bex4              | brain expressed gene 4                                                                                                             |
| 99849_at    | C85523   | 1200016E24Rik     | RIKEN cDNA 1200016E24 gene                                                                                                         |
| 102827_at   | AW124633 | Nek7              | NIMA (never in mitosis gene a)-related expressed kinase 7                                                                          |
| 104090_at   | AA657164 | Cdc23             | CDC23 (cell division cycle 23, yeast, homolog)                                                                                     |
| 101107_at   | U81829   | Calu              | calumenin                                                                                                                          |
| 98917_at    | AA823202 | Hiat1             | hippocampus abundant transcript-like 1                                                                                             |
| 104663_at   | D86177   | Pip5k1b           | phosphatidylinositol-4-phosphate 5-kinase, type 1 beta                                                                             |
| 93785_at    | M64782   | Folr1             | folate receptor 1 (adult)                                                                                                          |
| 98594_at    | AW125453 | 1190002N15Rik     | RIKEN cDNA 1190002N15 gene                                                                                                         |
| 102195_at   | U88984   | Map4k4            | mitogen-activated protein kinase kinase kinase 4                                                                                   |
| 97807_at    | AI838630 | Ufc1              | ubiquitin-fold modifier conjugating enzyme 1                                                                                       |
| 103736_at   | AI837786 | Sash1             | SAM and SH3 domain containing 1                                                                                                    |
| 96939_at    | AI842649 | Myl9              | myosin, light polypeptide 9, regulatory                                                                                            |
| 160271_at   | AW121255 | 0610007C21Rik     | RIKEN cDNA 0610007C21 gene                                                                                                         |
| 99095_at    | M63903   | Max               | Max protein                                                                                                                        |
| 93856_at    | M55512   | Wt1               | Wilms tumor homolog                                                                                                                |
| 103389_at   | AJ224761 | Aass              | aminoadipate-semialdehyde synthase                                                                                                 |
| 101430_at   | AW124153 | LOC672274         | similar to Transcription factor SOX-4                                                                                              |
| 94374_at    | AI850378 | Wdr13             | WD repeat domain 13                                                                                                                |
| 95037_at    | AW046639 | Cdk9              | cyclin-dependent kinase 9 (CDC2-related kinase)                                                                                    |
| 96629_at    | X04097   | Nudt19            | nudix (nucleoside diphosphate linked moiety X)-type motif 19                                                                       |
| 95913_at    | AI661057 | B230333C21Rik     | RIKEN cDNA B230333C21 gene                                                                                                         |
| 95721_at    | AW120722 | Mapkapk2          | MAP kinase-activated protein kinase 2                                                                                              |
| 102914_s_at | U23778   | Bcl2a1a /// Bcl2a | B-cell leukemia/lymphoma 2 related protein A1a /// B-cell leukemia/lymphoma 2 related protein A1b /// B-cell leukemia/lymphoma 2 r |
| 93829_at    | AW107884 | Rod1              | ROD1 regulator of differentiation 1 (S. pombe)                                                                                     |
| 94985_at    | AI846392 | Syncrin           | synaptotagmin binding, cytoplasmic RNA interacting protein                                                                         |
| 103048_at   | M12731   | Mycn              | v-myc myelocytomatosis viral related oncogene, neuroblastoma derived (avian)                                                       |
| 92553_at    | AB025408 | Esd               | esterase D/formylglutathione hydrolase                                                                                             |
| 93040_at    | AF091390 | Fxyd1             | FXYD domain-containing ion transport regulator 1                                                                                   |
| 92498_at    | AF115848 | Unc13b            | unc-13 homolog B (C. elegans)                                                                                                      |
| 160959_at   | AA597220 | Rcctb1            | regulator of chromosome condensation (RCC1) and BTB (POZ) domain containing protein 1                                              |
| 103504_at   | AI837107 | Ssbp2             | single-stranded DNA binding protein 2                                                                                              |
| 94047_at    | AW122935 | 0610031J06Rik     | RIKEN cDNA 0610031J06 gene                                                                                                         |

|             |          |                  |                                                                                                                                     |
|-------------|----------|------------------|-------------------------------------------------------------------------------------------------------------------------------------|
| 161001_at   | AV367683 | AA407270         | expressed sequence AA407270                                                                                                         |
| 160085_at   | U35741   | Tst              | thiosulfate sulfurtransferase, mitochondrial                                                                                        |
| 101093_at   | M15832   | Col4a1           | procollagen, type IV, alpha 1                                                                                                       |
| 102319_at   | AF062484 | Snx12            | sorting nexin 12                                                                                                                    |
| 104100_at   | AI845915 | Ptfr             | polymerase I and transcript release factor                                                                                          |
| 98013_at    | AA666464 | D15Ert621e       | DNA segment, Chr 15, ERATO Doi 621, expressed                                                                                       |
| 104067_at   | AI648999 | Tubgcp3          | tubulin, gamma complex associated protein 3                                                                                         |
| 97112_at    | AI157017 | Mrv1             | MRV integration site 1                                                                                                              |
| 94415_at    | AA710439 | Bach1            | BTB and CNC homology 1                                                                                                              |
| 104634_at   | AA874589 | Lims1            | LIM and senescent cell antigen-like domains 1                                                                                       |
| 97349_at    | AA727410 | Frm6             | FERM domain containing 6                                                                                                            |
| 93512_f_at  | AW121801 | Adk              | adenosine kinase                                                                                                                    |
| 92847_s_at  | X56831   | M6pr /// M6pr-ps | mannose-6-phosphate receptor, cation dependent /// mannose-6-phosphate receptor, pseudogene                                         |
| 93082_at    | AW124081 | Za20d3           | zinc finger, A20 domain containing 3                                                                                                |
| 100921_at   | U09181   | Tnni3            | troponin I, cardiac                                                                                                                 |
| 96041_at    | AB016424 | LOC671237        | similar to Putative RNA-binding protein 3 (RNA-binding motif protein 3)                                                             |
| 102328_at   | AJ007749 | Casp8            | caspase 8                                                                                                                           |
| 94105_at    | L78075   | Cdc42            | cell division cycle 42 homolog (S. cerevisiae)                                                                                      |
| 104118_at   | AW123781 | 2810037C14Rik    | RIKEN cDNA 2810037C14 gene                                                                                                          |
| 94771_at    | AA178600 | Rassf2           | Ras association (RalGDS/AF-6) domain family 2                                                                                       |
| 160469_at   | M62470   | Thbs1 /// LOC64  | thrombospondin 1 /// similar to thrombospondin 1                                                                                    |
| 95516_at    | AB027290 | Rab9             | RAB9, member RAS oncogene family                                                                                                    |
| 92241_at    | AI849075 | Nfic             | nuclear factor I/C                                                                                                                  |
| 93268_at    | AI852001 | Glo1             | glyoxalase 1                                                                                                                        |
| 92673_at    | U58886   | Sh3gl2           | SH3-domain GRB2-like 2                                                                                                              |
| 100606_at   | M18070   | Prnp             | prion protein                                                                                                                       |
| 101042_f_at | U51014   | Pepd             | peptidase D                                                                                                                         |
| 95731_at    | AI843106 | Sesn1            | sestrin 1                                                                                                                           |
| 97451_at    | AI837599 | Mcf2             | multiple coagulation factor deficiency 2                                                                                            |
| 160667_at   | U72519   | Evl              | Ena-vasodilator stimulated phosphoprotein                                                                                           |
| 96256_at    | M28723   | Prdx3            | peroxiredoxin 3                                                                                                                     |
| 160710_at   | AI846787 | Usp33            | ubiquitin specific peptidase 33                                                                                                     |
| 96765_at    | AW120874 | Peg3             | paternally expressed 3                                                                                                              |
| 160795_at   | AW123662 | Scamp1           | secretory carrier membrane protein 1                                                                                                |
| 104000_at   | AI181346 | 2210023G05Rik    | RIKEN cDNA 2210023G05 gene                                                                                                          |
| 96346_at    | AI854020 | Cdo1             | cysteine dioxygenase 1, cytosolic                                                                                                   |
| 97751_f_at  | AI835771 | LOC14433 /// AK  | similar to glyceraldehyde-3-phosphate dehydrogenase /// cDNA sequence AK190093                                                      |
| 160308_at   | AI839417 | Msn              | moesin                                                                                                                              |
| 93598_at    | AI840437 | Snx5             | sorting nexin 5                                                                                                                     |
| 92649_at    | Y18505   | D0HXS9928E       | DNA segment, human DXS9928E                                                                                                         |
| 94963_at    | AI462105 | Vcl              | vinculin                                                                                                                            |
| 94408_at    | U47008   | Nab1             | Ngfi-A binding protein 1                                                                                                            |
| 97336_at    | AJ131851 | Ctsf             | cathepsin F                                                                                                                         |
| 99600_at    | AI838337 | Ptov1            | prostate tumor over expressed gene 1                                                                                                |
| 96917_at    | AI842137 | 2410166105Rik    | RIKEN cDNA 2410166105 gene                                                                                                          |
| 160127_at   | L49507   | Ccng1            | cyclin G1                                                                                                                           |
| 96277_at    | AI850118 | Arpc5            | Actin related protein 2/3 complex, subunit 5                                                                                        |
| 93604_f_at  | AF061260 | Igsf4a           | immunoglobulin superfamily, member 4A                                                                                               |
| 92801_at    | M37335   | ---              | ---                                                                                                                                 |
| 160379_at   | L00919   | Epb4.1           | erythrocyte protein band 4.1                                                                                                        |
| 102959_at   | U61363   | Tle4             | transducin-like enhancer of split 4, homolog of Drosophila E(spl)                                                                   |
| 93264_at    | AI843895 | Sreb1            | sterol regulatory element binding factor 1                                                                                          |
| 161817_f_at | AV376312 | Spsb1            | splA/ryanodine receptor domain and SOCS box containing 1                                                                            |
| 103311_at   | AW121299 | Osbpl5           | oxysterol binding protein-like 5                                                                                                    |
| 103925_at   | AW120605 | Mllt3            | myeloid/lymphoid or mixed lineage-leukemia translocation to 3 homolog (Drosophila)                                                  |
| 100588_at   | U60329   | Psme2            | proteasome (prosome, macropain) 28 subunit, beta                                                                                    |
| 103021_r_at | AI317205 | Map3k1 /// LOC6  | mitogen activated protein kinase kinase kinase 1 /// similar to Mitogen-activated protein kinase kinase kinase 1 (MAPK/ERK kinase k |
| 103895_at   | AW121745 | AW549877         | expressed sequence AW549877                                                                                                         |
| 99070_at    | U12473   | Chuk             | conserved helix-loop-helix ubiquitous kinase                                                                                        |
| 98767_at    | AI842603 | Yy1              | YY1 transcription factor                                                                                                            |
| 96664_at    | AB025966 | Huwe1            | HECT, UBA and WWE domain containing 1                                                                                               |
| 160990_r_at | AA170696 | Rwdd4a           | RWD domain containing 4A                                                                                                            |
| 161960_f_at | AV221845 | Dynll2           | dynein light chain LC8-type 2                                                                                                       |
| 100998_at   | M21932   | H2-Ab1           | histocompatibility 2, class II antigen A, beta 1                                                                                    |
| 100032_at   | X60136   | Sp1              | trans-acting transcription factor 1                                                                                                 |
| 104618_at   | AI845819 | Rbbp9            | retinoblastoma binding protein 9                                                                                                    |

|             |          |                    |                                                                                                                                             |
|-------------|----------|--------------------|---------------------------------------------------------------------------------------------------------------------------------------------|
| 100584_at   | U72941   | Anxa4              | annexin A4                                                                                                                                  |
| 96608_at    | AF023463 | Phyh               | phytanoyl-CoA hydroxylase                                                                                                                   |
| 94018_at    | AW120725 | Ubl3               | ubiquitin-like 3                                                                                                                            |
| 93935_at    | AF036332 | Nlk                | nemo like kinase                                                                                                                            |
| 99583_at    | X53451   | Gstp1              | glutathione S-transferase, pi 1                                                                                                             |
| 103552_at   | AW046470 | Rabep1             | rabaptin, RAB GTPase binding effector protein 1                                                                                             |
| 99486_at    | X55038   | Cenpb /// Spef1    | centromere autoantigen B /// sperm flagellar 1                                                                                              |
| 99513_at    | M72394   | Pla2g4a            | phospholipase A2, group IVA (cytosolic, calcium-dependent)                                                                                  |
| 101957_f_at | X14206   | Parp1              | poly (ADP-ribose) polymerase family, member 1                                                                                               |
| 101539_f_at | AW226939 | Ces3               | carboxylesterase 3                                                                                                                          |
| 93271_s_at  | AF107848 | Gnas               | GNAS (guanine nucleotide binding protein, alpha stimulating) complex locus                                                                  |
| 160288_at   | AI841311 | Map1lc3b           | microtubule-associated protein 1 light chain 3 beta                                                                                         |
| 160207_at   | AW121639 | Acly               | ATP citrate lyase                                                                                                                           |
| 104375_at   | AI844853 | Spock2             | sparc/osteonectin, cwcv and kazal-like domains proteoglycan 2                                                                               |
| 160756_at   | AI847236 | Ralb               | v-ral simian leukemia viral oncogene homolog B (ras related)                                                                                |
| 101876_s_at | M35247   | H2-T10 /// H2-T2:  | histocompatibility 2, T region locus 10 /// histocompatibility 2, T region locus 22 /// histocompatibility 2, T region locus 9              |
| 101900_at   | AF059567 | Cdkn2b             | cyclin-dependent kinase inhibitor 2B (p15, inhibits CDK4)                                                                                   |
| 161962_f_at | AV366654 | Mfap4              | microfibrillar-associated protein 4                                                                                                         |
| 95688_at    | Y08460   | Degs1              | degenerative spermatocyte homolog 1 (Drosophila)                                                                                            |
| 95655_at    | AA717740 | 5830411E10Rik      | RIKEN cDNA 5830411E10 gene                                                                                                                  |
| 104352_at   | AI838366 | Brd4               | bromodomain containing 4                                                                                                                    |
| 94445_at    | AW125273 | Pls3               | plastin 3 (T-isoform)                                                                                                                       |
| 160758_at   | AW124855 | Seh1l              | SEH1-like (S. cerevisiae)                                                                                                                   |
| 97557_at    | AI841457 | Tor2a              | torsin family 2, member A                                                                                                                   |
| 99366_at    | AI553536 | Pqlc3              | PQ loop repeat containing                                                                                                                   |
| 160982_at   | AW213866 | 4921526G09Rik      | RIKEN cDNA 4921526G09 gene                                                                                                                  |
| 104395_at   | AW121826 | Itpkb              | inositol 1,4,5-trisphosphate 3-kinase B                                                                                                     |
| 104410_at   | AW124785 | Midn               | midnolin                                                                                                                                    |
| 98372_at    | AW050387 | Aldh1a3            | aldehyde dehydrogenase family 1, subfamily A3                                                                                               |
| 101851_at   | AF029215 | Cd200              | Cd200 antigen                                                                                                                               |
| 102224_at   | AF056187 | D930020L01         | hypothetical protein D930020L01                                                                                                             |
| 93605_r_at  | AF061260 | Igsf4a             | immunoglobulin superfamily, member 4A                                                                                                       |
| 103415_at   | AI840925 | Wrrn1p1            | Werner helicase interacting protein 1                                                                                                       |
| 92546_r_at  | AB006361 | Ptgds              | prostaglandin D2 synthase (brain)                                                                                                           |
| 103682_at   | AA122571 | C80913             | expressed sequence C80913                                                                                                                   |
| 96049_at    | X53928   | Bgn                | biglycan                                                                                                                                    |
| 93411_at    | AI152789 | Sema7a             | sema domain, immunoglobulin domain (Ig), and GPI membrane anchor, (semaphorin) 7A                                                           |
| 93975_at    | AI853531 | Errfi1             | ERBB receptor feedback inhibitor 1                                                                                                          |
| 160637_at   | AW060325 | Mocs2              | molybdenum cofactor synthesis 2                                                                                                             |
| 100089_at   | M74227   | Ppic               | peptidylprolyl isomerase C                                                                                                                  |
| 101869_s_at | J00413   | Hbb-b1 /// Hbb-b2: | hemoglobin, beta adult major chain /// hemoglobin, beta adult minor chain                                                                   |
| 95634_at    | AI848107 | 0610010K14Rik      | RIKEN cDNA 0610010K14 gene                                                                                                                  |
| 100579_s_at | U91848   | Clta               | clathrin, light polypeptide (Lca)                                                                                                           |
| 92579_at    | L00993   | Ssb                | Sjogren syndrome antigen B                                                                                                                  |
| 98915_at    | AI849082 | Rnf149             | ring finger protein 149                                                                                                                     |
| 92773_at    | AF079528 | Nrp1               | neuropilin 1                                                                                                                                |
| 100988_at   | AA796690 | Bcl2l11            | BCL2-like 11 (apoptosis facilitator)                                                                                                        |
| 161613_at   | AV351002 | Chmp7              | CHMP family, member 7                                                                                                                       |
| 97173_f_at  | M27134   | H2-Q2 /// LOC631   | histocompatibility 2, Q region locus 2 /// similar to H-2 class I histocompatibility antigen, D-K alpha chain precursor (H-2D(K)) /// simil |
| 160714_at   | AI046826 | Gab1               | growth factor receptor bound protein 2-associated protein 1                                                                                 |
| 97863_at    | AW125274 | D8Ert354e          | DNA segment, Chr 8, ERATO Doi 354, expressed                                                                                                |
| 101963_at   | X06086   | Ctsl               | cathepsin L                                                                                                                                 |
| 103584_at   | AW124334 | 5830471E12Rik      | RIKEN cDNA 5830471E12 gene                                                                                                                  |
| 94511_at    | AI850546 | LOC636537          | similar to signal sequence receptor, alpha                                                                                                  |
| 100900_at   | AW209053 | Hcfc1              | host cell factor C1                                                                                                                         |
| 101918_at   | AJ009862 | Tgfb1              | transforming growth factor, beta 1                                                                                                          |
| 103873_i_at | AA684456 | 2310015N07Rik      | RIKEN cDNA 2310015N07 gene                                                                                                                  |
| 96104_at    | AI047107 | 3732413I11Rik      | RIKEN cDNA 3732413I11 gene                                                                                                                  |
| 160365_at   | AW125491 | Eif2s2             | eukaryotic translation initiation factor 2, subunit 2 (beta)                                                                                |
| 99629_at    | AW060710 | Ei24               | etoposide induced 2.4 mRNA                                                                                                                  |
| 103385_at   | U64033   | Tera               | teratocarcinoma expressed, serine rich                                                                                                      |
| 93056_g_at  | AW049376 | Ankrd46            | ankyrin repeat domain 46                                                                                                                    |
| 102021_at   | M27960   | Il4ra              | interleukin 4 receptor, alpha                                                                                                               |
| 98628_f_at  | AF003695 | Hif1a              | hypoxia inducible factor 1, alpha subunit                                                                                                   |
| 94478_at    | AI841377 | Rab5a              | RAB5A, member RAS oncogene family                                                                                                           |
| 98989_at    | AF057368 | Dhcr7              | 7-dehydrocholesterol reductase                                                                                                              |

|             |          |                  |                                                                                                    |
|-------------|----------|------------------|----------------------------------------------------------------------------------------------------|
| 92927_at    | L10426   | Etv1             | ets variant gene 1                                                                                 |
| 160409_at   | U96725   | Pitpna           | phosphatidylinositol transfer protein, alpha                                                       |
| 160955_at   | AW124904 | AW124904         | 2010309E21Rik RIKEN cDNA 2010309E21 gene                                                           |
| 98138_at    | AI854776 | Rpl71            | ribosomal protein L7-like 1                                                                        |
| 104380_at   | Z71268   | Slc35a1          | solute carrier family 35 (CMP-sialic acid transporter), member 1                                   |
| 93346_at    | M15668   | Pgk1             | phosphoglycerate kinase 1                                                                          |
| 160646_at   | AI851983 | Gsr /// LOC63072 | glutathione reductase 1 /// similar to Glutathione reductase, mitochondrial precursor (GR) (GRase) |
| 93471_at    | AI594427 | Slc4a7           | Solute carrier family 4, sodium bicarbonate cotransporter, member 7                                |
| 100633_at   | AW124268 | Mosc2            | MOCO sulphurase C-terminal domain containing 2                                                     |
| 98957_at    | AI850297 | Jam3             | junction adhesion molecule 3                                                                       |
| 92638_at    | Z67745   | Ppp2ca           | protein phosphatase 2 (formerly 2A), catalytic subunit, alpha isoform                              |
| 97458_at    | AI845935 | Gnb1             | guanine nucleotide binding protein, beta 1                                                         |
| 104620_at   | AW123402 | Tmem68           | transmembrane protein 68                                                                           |
| 160575_at   | AW045426 | Cggbp1           | CGG triplet repeat binding protein 1                                                               |
| 161079_at   | AW122909 | Naalad2          | N-acetylated alpha-linked acidic dipeptidase 2                                                     |
| 160111_at   | AI849718 | Eif1ay           | eukaryotic translation initiation factor 1A, Y-linked                                              |
| 99640_at    | AW045481 | Minpp1           | multiple inositol polyphosphate histidine phosphatase 1                                            |
| 104461_at   | AW121773 | Pik3ca           | phosphatidylinositol 3-kinase, catalytic, alpha polypeptide                                        |
| 97681_f_at  | J03953   | Gstm3            | glutathione S-transferase, mu 3                                                                    |
| 93623_at    | U56724   | Dmd              | dystrophin, muscular dystrophy                                                                     |
| 92280_at    | AA867778 | Actn1            | actinin, alpha 1                                                                                   |
| 95507_at    | AB025048 | Prps1            | phosphoribosyl pyrophosphate synthetase 1                                                          |
| 101965_at   | AF037205 | Rnf13            | ring finger protein 13                                                                             |
| 103573_at   | D86176   | Pip5k1a          | phosphatidylinositol-4-phosphate 5-kinase, type 1 alpha                                            |
| 92698_at    | U21301   | Mertk            | c-mer proto-oncogene tyrosine kinase                                                               |
| 161444_f_at | AV352777 | Ints5            | integrator complex subunit 5                                                                       |
| 103636_at   | AI840971 | Pnkd             | paroxysmal nonkinesigenic dyskinesia                                                               |
| 98107_at    | AW123801 | Coro1c           | coronin, actin binding protein 1C                                                                  |
| 101879_s_at | M23529   | Crry             | complement receptor related protein                                                                |
| 160659_at   | AI853129 | Hddc2            | HD domain containing 2                                                                             |
| 160727_at   | AW046357 | 2410002F23Rik    | RIKEN cDNA 2410002F23 gene                                                                         |
| 98981_s_at  | X64840   | Tcf12            | transcription factor 12                                                                            |
| 100958_at   | AI647003 | Spata13          | spermatogenesis associated 13                                                                      |
| 98432_at    | X99384   | X99384           | cDNA sequence X99384                                                                               |
| 98880_at    | AW124955 | D6Wsu116e        | DNA segment, Chr 6, Wayne State University 116, expressed                                          |
| 94471_r_at  | AW045974 | Slc30a5          | solute carrier family 30 (zinc transporter), member 5                                              |
| 92971_at    | AW125849 | ---              | ---                                                                                                |
| 103723_at   | AA608387 | Il13ra1          | interleukin 13 receptor, alpha 1                                                                   |
| 97930_f_at  | AF033620 | Cd151            | CD151 antigen                                                                                      |
| 95418_at    | AI848851 | Rasl11b          | RAS-like, family 11, member B                                                                      |
| 102416_at   | M64863   | Cyp17a1          | cytochrome P450, family 17, subfamily a, polypeptide 1                                             |
| 160309_at   | AW259500 | Map3k7ip2        | mitogen-activated protein kinase kinase kinase 7 interacting protein 2                             |
| 100977_at   | AA691492 | Pdk1             | pyruvate dehydrogenase kinase, isoenzyme 1                                                         |
| 93974_at    | AW212475 | Errfi1           | ERBB receptor feedback inhibitor 1                                                                 |
| 99587_at    | X89650   | Rab7             | RAB7, member RAS oncogene family                                                                   |
| 99451_at    | AW060510 | C230093N12Rik    | RIKEN cDNA C230093N12 gene                                                                         |
| 103321_at   | AI536457 | Mobk1a           | MOB1, Mps One Binder kinase activator-like 1A (yeast)                                              |
| 101930_at   | Y07688   | Nfix             | nuclear factor I/X                                                                                 |
| 103371_at   | AF100956 | Slc39a7          | solute carrier family 39 (zinc transporter), member 7                                              |
| 94331_at    | L47650   | Stat6            | signal transducer and activator of transcription 6                                                 |
| 95355_at    | AA407794 | Agtrap           | angiotensin II, type I receptor-associated protein                                                 |
| 98629_f_at  | Y09085   | Hif1a            | hypoxia inducible factor 1, alpha subunit                                                          |
| 92834_at    | X51528   | Rpl13a           | ribosomal protein L13a                                                                             |
| 98593_at    | AJ006215 | Cmas             | cytidine monophospho-N-acetylneuraminic acid synthetase                                            |
| 96614_at    | AA763368 | 4933426M11Rik    | RIKEN cDNA 4933426M11 gene                                                                         |
| 97918_at    | AA623587 | AA536743         | expressed sequence AA536743                                                                        |
| 103216_f_at | AW122931 | Ikbkg            | inhibitor of kappaB kinase gamma                                                                   |
| 93656_g_at  | X95316   | Usf1             | upstream transcription factor 1                                                                    |
| 160777_at   | AI851515 | Ttc7b            | tetratricopeptide repeat domain 7B                                                                 |
| 100554_at   | AF053367 | Pdlim1           | PDZ and LIM domain 1 (elfin)                                                                       |
| 96794_at    | AI851584 | Zfp622           | zinc finger protein 622                                                                            |
| 95417_at    | AI117848 | Mgat2            | mannoside acetylglucosaminyltransferase 2                                                          |
| 96343_at    | AI836968 | Actn4            | actinin alpha 4                                                                                    |
| 95129_at    | AW121057 | Ncor2            | nuclear receptor co-repressor 2                                                                    |
| 100962_at   | U47543   | Nab2             | Ngfi-A binding protein 2                                                                           |
| 162459_f_at | AV010209 | Col6a1           | procollagen, type VI, alpha 1                                                                      |

|             |          |               |                                                                          |
|-------------|----------|---------------|--------------------------------------------------------------------------|
| 102022_at   | AW124555 | Mcee          | methylmalonyl CoA epimerase                                              |
| 95153_at    | AI845988 | Cdc42se2      | CDC42 small effector 2                                                   |
| 101123_at   | U76253   | ltm2b         | integral membrane protein 2B                                             |
| 103202_at   | AW047476 | Gbp4          | guanylate nucleotide binding protein 4                                   |
| 102960_at   | X96618   | Rag1ap1       | recombination activating gene 1 activating protein 1                     |
| 161437_f_at | AV349142 | 6530401N04Rik | RIKEN cDNA 6530401N04 gene /// hypothetical protein LOC638977            |
| 94424_at    | AW048712 | Ankrd13c      | ankyrin repeat domain 13c                                                |
| 92908_at    | L36829   | Hivep1        | human immunodeficiency virus type I enhancer binding protein 1           |
| 160139_at   | AI848798 | Hspb8         | heat shock protein 8                                                     |
| 104070_at   | AW047728 | Pcaf          | p300/CBP-associated factor                                               |
| 93327_at    | AI842665 | Tax1bp3       | Tax1 (human T-cell leukemia virus type I) binding protein 3              |
| 96127_at    | AW048730 | Sgpl1         | sphingosine phosphate lyase 1                                            |
| 92767_at    | D16250   | Bmpr1a        | bone morphogenetic protein receptor, type 1A                             |
| 101929_at   | AI836322 | Dynll2        | dynein light chain LC8-type 2                                            |
| 96147_at    | AW125070 | Mafg          | v-maf musculoaponeurotic fibrosarcoma oncogene family, protein G (avian) |
| 160609_at   | AI314990 | Atp7a         | ATPase, Cu <sup>++</sup> transporting, alpha polypeptide                 |
| 161997_f_at | AV329607 | ---           | ---                                                                      |
| 97114_at    | U57999   | Psap          | prosaposin                                                               |
| 103845_at   | AI839005 | Slc31a1       | solute carrier family 31, member 1                                       |
| 100877_at   | AI194274 | 1810058I24Rik | RIKEN cDNA 1810058I24 gene                                               |
| 95518_at    | AW122893 | 1810015C04Rik | RIKEN cDNA 1810015C04 gene                                               |
| 95074_at    | AW125309 | Pex19         | peroxisome biogenesis factor 19                                          |
| 101102_at   | AJ223156 | Igbb1         | immunoglobulin (CD79A) binding protein 1                                 |
| 160632_at   | AW124627 | Prkcn         | protein kinase C, nu                                                     |
| 97387_at    | AI847879 | D1Bwg1363e    | DNA segment, Chr 1, Brigham & Women's Genetics 1363 expressed            |
| 102322_at   | AF061017 | Ugdh          | UDP-glucose dehydrogenase                                                |
| 98407_at    | U07602   | Efnb1         | ephrin B1                                                                |
| 94054_at    | AI841808 | Cttn          | cortactin                                                                |
| 103767_f_at | AA675006 | Rrm2b         | ribonucleotide reductase M2 B (TP53 inducible)                           |
| 95062_at    | AB026997 | Cast          | calpastatin                                                              |
| 96728_at    | AI844151 | Wdr45         | WD repeat domain 45                                                      |
| 93391_at    | AF032995 | Crygs         | crystallin, gamma S                                                      |
| 101442_f_at | AF031127 | Itp2          | inositol 1,4,5-triphosphate receptor 2                                   |
| 104350_at   | AI050321 | Shc1          | src homology 2 domain-containing transforming protein C1                 |
| 160205_f_at | AB024427 | Rnf11         | ring finger protein 11                                                   |
| 103281_at   | AF077003 | Cd2ap         | CD2-associated protein                                                   |
| 93586_at    | AJ002307 | Syng2         | synaptogyrin 2                                                           |
| 94056_at    | M21285   | Scd1          | stearoyl-Coenzyme A desaturase 1                                         |
| 93303_at    | U64445   | Ufd1l         | ubiquitin fusion degradation 1 like                                      |
| 102038_at   | AF034745 | Lnx1          | ligand of numb-protein X 1                                               |
| 94855_at    | X78682   | Phb           | prohibitin                                                               |
| 103043_at   | Z35294   | Mtcp1         | mature T-cell proliferation 1                                            |
| 92227_s_at  | D25281   | Ctnna2        | catenin (cadherin associated protein), alpha 2                           |
| 160513_at   | AA646408 | 2210016F16Rik | RIKEN cDNA 2210016F16 gene                                               |
| 101040_at   | D38117   | Capn2         | calpain 2                                                                |
| 98609_at    | AJ250723 | 37507         | septin 9                                                                 |
| 97888_at    | AI849676 | Frag1         | FGF receptor activating protein 1                                        |
| 103085_at   | AB013095 | Hebp1         | heme binding protein 1                                                   |
| 92545_f_at  | AB006361 | Ptgds         | prostaglandin D2 synthase (brain)                                        |
| 96858_at    | AF100927 | Pdcd8         | programmed cell death 8                                                  |
| 98424_at    | D83966   | Ptpn13        | protein tyrosine phosphatase, non-receptor type 13                       |
| 96122_at    | AW049373 | 2310016A09Rik | RIKEN cDNA 2310016A09 gene                                               |
| 99143_at    | AA614914 | Tgoln1        | trans-golgi network protein                                              |
| 104327_at   | AA755234 | AI265322      | expressed sequence AI265322                                              |
| 97967_at    | AA881438 | Plxnd1        | Plexin D1                                                                |
| 93064_at    | AF035207 | Bnip2         | BCL2/adenovirus E1B interacting protein 1, NIP2                          |
| 100636_at   | U28656   | Eif4ebp1      | eukaryotic translation initiation factor 4E binding protein 1            |
| 101555_at   | X57277   | Rac1          | RAS-related C3 botulinum substrate 1                                     |
| 95765_at    | U48971   | LOC635419     | similar to alcohol dehydrogenase 5 (class III), chi polypeptide          |
| 101528_at   | D00925   | Tcea1         | transcription elongation factor A (SII) 1                                |
| 162094_f_at | AV339425 | ---           | ---                                                                      |
| 162234_f_at | AV139913 | Cxcl12        | chemokine (C-X-C motif) ligand 12                                        |
| 96199_at    | AF073996 | Mtm1          | X-linked myotubular myopathy gene 1                                      |
| 100059_at   | M31775   | Cyba          | cytochrome b-245, alpha polypeptide                                      |
| 99494_at    | AJ001700 | Serpini1      | serine (or cysteine) peptidase inhibitor, clade I, member 1              |
| 94301_at    | AI843269 | Atp6v0e       | ATPase, H <sup>+</sup> transporting, lysosomal V0 subunit E              |

|             |          |                   |                                                                                                                                        |
|-------------|----------|-------------------|----------------------------------------------------------------------------------------------------------------------------------------|
| 97449_at    | AI835461 | Aldh7a1           | aldehyde dehydrogenase family 7, member A1                                                                                             |
| 103654_at   | AB018374 | Nsbp1             | nucleosome binding protein 1                                                                                                           |
| 96205_at    | AW048272 | Sh3bgr            | SH3-binding domain glutamic acid-rich protein                                                                                          |
| 100084_at   | X60671   | Vil2              | villin 2                                                                                                                               |
| 101109_at   | U43512   | Dag1              | dystroglycan 1                                                                                                                         |
| 102761_at   | AF041060 | Grpel2            | GrpE-like 2, mitochondrial                                                                                                             |
| 98005_at    | AW125442 | Pkia              | protein kinase inhibitor, alpha                                                                                                        |
| 93868_at    | AL021127 | Nsdhl             | NAD(P) dependent steroid dehydrogenase-like                                                                                            |
| 102751_at   | M32745   | Tgfb3             | transforming growth factor, beta 3                                                                                                     |
| 94898_at    | AI848555 | Rbm18             | RNA binding motif protein 18                                                                                                           |
| 97976_at    | L43326   | Ktn1              | kinectin 1                                                                                                                             |
| 100923_at   | AJ249706 | Myo10             | myosin X                                                                                                                               |
| 100124_r_at | X15202   | Itgb1             | integrin beta 1 (fibronectin receptor beta)                                                                                            |
| 94242_at    | AA881309 | Txn15             | thioredoxin-like 5                                                                                                                     |
| 160321_at   | AF062071 | Za20d2            | zinc finger, A20 domain containing 2                                                                                                   |
| 162077_f_at | AV327760 | Scd2              | stearoyl-Coenzyme A desaturase 2                                                                                                       |
| 104315_at   | AI846773 | Arhgap1           | Rho GTPase activating protein 1                                                                                                        |
| 160615_at   | AI835963 | Pias3             | protein inhibitor of activated STAT 3                                                                                                  |
| 160724_at   | AJ245617 | Trfp              | Trf (TATA binding protein-related factor)-proximal protein homolog (Drosophila)                                                        |
| 99067_at    | X59846   | Gas6              | growth arrest specific 6                                                                                                               |
| 160356_at   | AI851401 | Cmpk              | cytidylate kinase                                                                                                                      |
| 99001_at    | AF017806 | Zfp292            | zinc finger protein 292                                                                                                                |
| 96752_at    | M90551   | Icam1             | intercellular adhesion molecule                                                                                                        |
| 160296_at   | AF033188 | Wsb2              | WD repeat and SOCS box-containing 2                                                                                                    |
| 100523_r_at | U92454   | Wbp5              | WW domain binding protein 5                                                                                                            |
| 98356_at    | AW125421 | D16Wsu65e         | DNA segment, Chr 16, Wayne State University 65, expressed                                                                              |
| 103547_at   | AI837116 | Slc41a1           | solute carrier family 41, member 1                                                                                                     |
| 104264_at   | AW122230 | Lrba              | LPS-responsive beige-like anchor                                                                                                       |
| 101990_at   | X51905   | Ldhb              | lactate dehydrogenase B                                                                                                                |
| 94788_f_at  | X04663   | Tubb5             | tubulin, beta 5                                                                                                                        |
| 104589_at   | AF091096 | C80913            | expressed sequence C80913                                                                                                              |
| 96947_at    | AW046273 | Etfb              | electron transferring flavoprotein, beta polypeptide                                                                                   |
| 93485_at    | AI844911 | Ptprd             | protein tyrosine phosphatase, receptor type, D                                                                                         |
| 161401_f_at | AV276715 | Aldh3a2           | aldehyde dehydrogenase family 3, subfamily A2                                                                                          |
| 99019_at    | D17571   | Por               | P450 (cytochrome) oxidoreductase                                                                                                       |
| 101562_at   | U08215   | Hspa14            | heat shock protein 14                                                                                                                  |
| 94275_at    | U34691   | Urod              | uroporphyrinogen decarboxylase                                                                                                         |
| 96884_at    | AI847631 | Carhsp1           | calcium regulated heat stable protein 1                                                                                                |
| 92625_at    | X68193   | Nme2              | expressed in non-metastatic cells 2, protein                                                                                           |
| 95109_at    | AW121447 | Nol5a             | nucleolar protein 5A                                                                                                                   |
| 102337_s_at | M31312   | Fcgr2b            | Fc receptor, IgG, low affinity IIb                                                                                                     |
| 103720_at   | AI449034 | Rest              | RE1-silencing transcription factor                                                                                                     |
| 98553_at    | AW124175 | Slmap             | sarcolemma associated protein                                                                                                          |
| 101457_at   | L16956   | Jak2              | Janus kinase 2                                                                                                                         |
| 100457_at   | X84037   | Glg1              | golgi apparatus protein 1                                                                                                              |
| 95514_at    | AI846302 | Rcc2              | regulator of chromosome condensation 2                                                                                                 |
| 102924_at   | U38252   | Dtx1              | deltex 1 homolog (Drosophila)                                                                                                          |
| 103886_at   | AI850356 | Reep5             | receptor accessory protein 5                                                                                                           |
| 162263_f_at | AV357656 | Lamb1-1           | laminin B1 subunit 1                                                                                                                   |
| 94854_g_at  | U29055   | Gnb1              | guanine nucleotide binding protein, beta 1                                                                                             |
| 99133_at    | X14309   | Slc3a2            | solute carrier family 3 (activators of dibasic and neutral amino acid transport), member 2                                             |
| 100618_f_at | AA062013 | Slc25a5 /// LOC4  | solute carrier family 25 (mitochondrial carrier, adenine nucleotide translocator), member 5 /// similar to ADP/ATP translocase 2 (Ader |
| 104471_at   | AF006603 | LOC669168         | similar to Histone deacetylase 6 (HD6) (Histone deacetylase mHDA2)                                                                     |
| 97498_at    | U41739   | Fhl1              | four and a half LIM domains 1                                                                                                          |
| 100700_s_at | AB000490 | Nr5a1             | nuclear receptor subfamily 5, group A, member 1                                                                                        |
| 104464_s_at | AI642389 | Kdelr3            | KDEL (Lys-Asp-Glu-Leu) endoplasmic reticulum protein retention receptor 3                                                              |
| 93536_at    | L22472   | Bax               | Bcl2-associated X protein                                                                                                              |
| 99964_at    | AW061016 | Vdr               | vitamin D receptor                                                                                                                     |
| 101489_at   | D12780   | Amd1              | S-adenosylmethionine decarboxylase 1                                                                                                   |
| 96709_at    | AI839839 | 1110008P14Rik     | RIKEN cDNA 1110008P14 gene                                                                                                             |
| 93865_s_at  | M35244   | H2-T10 /// H2-T2: | histocompatibility 2, T region locus 10 /// histocompatibility 2, T region locus 22 /// histocompatibility 2, T region locus 9         |
| 94087_at    | Z34524   | Prkcm             | protein kinase C, mu                                                                                                                   |
| 160412_at   | U10903   | Pdcd2             | programmed cell death 2                                                                                                                |
| 99013_f_at  | AI846797 | Tmod3             | tropomodulin 3                                                                                                                         |
| 160391_at   | AI853364 | Fads1             | fatty acid desaturase 1                                                                                                                |
| 104534_at   | AA623874 | Pgm1              | phosphoglucomutase 1                                                                                                                   |

|             |          |                 |                                                                                                                                         |
|-------------|----------|-----------------|-----------------------------------------------------------------------------------------------------------------------------------------|
| 98024_at    | X55316   | Nfyb            | nuclear transcription factor-Y beta                                                                                                     |
| 92804_at    | AW122864 | Polr2h          | polymerase (RNA) II (DNA directed) polypeptide H                                                                                        |
| 94285_at    | X00958   | H2-Eb1          | histocompatibility 2, class II antigen E beta                                                                                           |
| 103739_at   | AW230977 | Glce            | glucuronyl C5-epimerase                                                                                                                 |
| 103047_at   | AF031128 | Pxmp3           | peroxisomal membrane protein 3                                                                                                          |
| 104294_at   | AI850948 | Ibtk            | inhibitor of Bruton agammaglobulinemia tyrosine kinase                                                                                  |
| 160135_at   | AW122914 | Nit2            | nitrilase family, member 2                                                                                                              |
| 101458_at   | D30743   | Wee1            | wee 1 homolog (S. pombe)                                                                                                                |
| 104299_at   | AI842472 | Zdhhc14         | zinc finger, DHHC domain containing 14                                                                                                  |
| 100374_at   | AL133300 | Dmrt1           | doublesex and mab-3 related transcription factor 1                                                                                      |
| 104004_at   | AI931876 | Golph4          | golgi phosphoprotein 4                                                                                                                  |
| 94319_at    | L04966   | Rab18           | RAB18, member RAS oncogene family                                                                                                       |
| 92637_at    | J03928   | Pfkl            | phosphofructokinase, liver, B-type                                                                                                      |
| 103015_at   | U41465   | Bcl6            | B-cell leukemia/lymphoma 6                                                                                                              |
| 95018_r_at  | AA607053 | AU021838        | expressed sequence AU021838                                                                                                             |
| 104252_at   | AW123823 | AU020206        | expressed sequence AU020206                                                                                                             |
| 97265_at    | AI835060 | 1810013D10Rik   | RIKEN cDNA 1810013D10 gene                                                                                                              |
| 93323_at    | AB031292 | Plp2            | proteolipid protein 2                                                                                                                   |
| 99481_at    | AI839697 | Atp1a2          | ATPase, Na+/K+ transporting, alpha 2 polypeptide                                                                                        |
| 92517_at    | AB026583 | Rbms2           | RNA binding motif, single stranded interacting protein 2                                                                                |
| 93306_at    | U51196   | Mapre1          | microtubule-associated protein, RP/EB family, member 1                                                                                  |
| 102292_at   | U00937   | Gadd45a         | growth arrest and DNA-damage-inducible 45 alpha                                                                                         |
| 98102_at    | M76727   | Pdha1           | pyruvate dehydrogenase E1 alpha 1                                                                                                       |
| 96146_at    | D83745   | Btg3 // LOC6404 | B-cell translocation gene 3 // similar to BTG3 protein (Tob5 protein) (Abundant in neuroepithelium area protein) // B-cell translocatio |
| 160859_s_at | Y07685   | Nfib            | nuclear factor I/B                                                                                                                      |
| 97824_at    | AW121031 | Nola2           | nucleolar protein family A, member 2                                                                                                    |
| 94055_at    | U03184   | Cttn            | cortactin                                                                                                                               |
| 99669_at    | X15986   | Lgals1          | lectin, galactose binding, soluble 1                                                                                                    |
| 95002_at    | AI838731 | D17Wsu92e       | DNA segment, Chr 17, Wayne State University 92, expressed                                                                               |
| 103497_at   | AA592351 | BC025546        | cDNA sequence BC025546                                                                                                                  |
| 103391_at   | AI988033 | Ccbl2           | cysteine conjugate-beta lyase 2                                                                                                         |
| 95469_at    | AA734444 | Btd             | biotinidase                                                                                                                             |
| 97903_at    | AW050078 | Tsen34          | tRNA splicing endonuclease 34 homolog (SEN34, S. cerevisiae)                                                                            |
| 93936_at    | L09562   | Ptprg // LOC632 | protein tyrosine phosphatase, receptor type, G // similar to protein tyrosine phosphatase, receptor type, G                             |
| 160705_at   | U65091   | Cited1          | Cbp/p300-interacting transactivator with Glu/Asp-rich carboxy-terminal domain 1                                                         |
| 98458_at    | AI155192 | 1190007F08Rik   | RIKEN cDNA 1190007F08 gene                                                                                                              |
| 96649_at    | AW046552 | Txndc14         | thioredoxin domain containing 14                                                                                                        |
| 160740_at   | AA615984 | Gm561           | gene model 561, (NCBI)                                                                                                                  |
| 161464_f_at | AV347226 | Stk24           | serine/threonine kinase 24 (STE20 homolog, yeast)                                                                                       |
| 93145_at    | AI840824 | Gatad2a         | GATA zinc finger domain containing 2A                                                                                                   |
| 101509_at   | U96760   | Vbp1            | von Hippel-Lindau binding protein 1                                                                                                     |
| 160209_at   | AI850285 | Rnf44           | ring finger protein 44                                                                                                                  |
| 98602_at    | U08110   | Rangap1         | RAN GTPase activating protein 1                                                                                                         |
| 94499_at    | AI835427 | Mgea5           | meningioma expressed antigen 5 (hyaluronidase)                                                                                          |
| 97248_at    | X61431   | Dbi             | diazepam binding inhibitor                                                                                                              |
| 93185_at    | AW045808 | AU021092        | expressed sequence AU021092                                                                                                             |
| 103238_at   | M89797   | Wnt4            | wingless-related MMTV integration site 4                                                                                                |
| 160754_at   | AI850363 | Pygm            | muscle glycogen phosphorylase                                                                                                           |
| 95430_f_at  | AI854154 | Spg21           | spastic paraplegia 21 homolog (human)                                                                                                   |
| 102401_at   | M21065   | Irf1            | interferon regulatory factor 1                                                                                                          |
| 96564_at    | X54401   | Hspa8 // LOC62  | heat shock protein 8 // similar to heat shock protein 8 // similar to heat shock protein 8 // similar to heat shock protein 8           |
| 162245_f_at | AV332872 | Myo6            | myosin VI                                                                                                                               |
| 104595_at   | AI846890 | Stag2           | stromal antigen 2                                                                                                                       |
| 96207_at    | AW046449 | Rbms1           | RNA binding motif, single stranded interacting protein 1                                                                                |
| 93747_at    | AW122599 | Ptplad1         | protein tyrosine phosphatase-like A domain containing 1                                                                                 |
| 98503_at    | U53586   | Evi5            | ecotropic viral integration site 5                                                                                                      |
| 95462_at    | AW060951 | Bzw2            | basic leucine zipper and W2 domains 2                                                                                                   |
| 104079_at   | AW124678 | Dyrk1a          | dual-specificity tyrosine-(Y)-phosphorylation regulated kinase 1a                                                                       |
| 96670_at    | AI841295 | Gstk1           | glutathione S-transferase kappa 1                                                                                                       |
| 160963_at   | AI551141 | 9630050M13Rik   | RIKEN cDNA 9630050M13 gene                                                                                                              |
| 161010_r_at | AI843786 | Cdkn1b          | cyclin-dependent kinase inhibitor 1B (P27)                                                                                              |
| 93491_f_at  | AI836623 | Ube2d3          | ubiquitin-conjugating enzyme E2D 3 (UBC4/5 homolog, yeast)                                                                              |
| 160827_at   | AI835968 | Rin2            | Ras and Rab interactor 2                                                                                                                |
| 97324_at    | AW048291 | 5133401N09Rik   | RIKEN cDNA 5133401N09 gene                                                                                                              |
| 104033_at   | AI841996 | Mgea6           | meningioma expressed antigen 6 (coiled-coil proline-rich)                                                                               |
| 97869_at    | AI844043 | Etfdh           | electron transferring flavoprotein, dehydrogenase                                                                                       |

|             |          |                  |                                                                                                                                                              |
|-------------|----------|------------------|--------------------------------------------------------------------------------------------------------------------------------------------------------------|
| 101676_at   | U13705   | Gpx3             | glutathione peroxidase 3                                                                                                                                     |
| 96695_at    | AF089812 | Ube2a            | ubiquitin-conjugating enzyme E2A, RAD6 homolog (S. cerevisiae)                                                                                               |
| 101017_at   | AA791962 | Cdk4             | cyclin-dependent kinase 4                                                                                                                                    |
| 160971_at   | AI842353 | Kazald1          | Kazal-type serine peptidase inhibitor domain 1                                                                                                               |
| 96949_at    | AI853542 | Ythdf1           | YTH domain family 1                                                                                                                                          |
| 103888_at   | AA636171 | Rbpms            | RNA binding protein gene with multiple splicing                                                                                                              |
| 96623_at    | AI853172 | Ugcg             | UDP-glucose ceramide glucosyltransferase                                                                                                                     |
| 97195_at    | U38501   | Gnai1            | guanine nucleotide binding protein, alpha inhibiting 1                                                                                                       |
| 103727_at   | AI850972 | Hrb              | HIV-1 Rev binding protein                                                                                                                                    |
| 101589_at   | X12944   | Hmgn2            | high mobility group nucleosomal binding domain 2                                                                                                             |
| 98942_r_at  | AW125284 | Prei4            | preimplantation protein 4                                                                                                                                    |
| 94325_at    | AW124932 | Hmgcs1           | 3-hydroxy-3-methylglutaryl-Coenzyme A synthase 1                                                                                                             |
| 97347_at    | AA838868 | Ltbp4            | latent transforming growth factor beta binding protein 4                                                                                                     |
| 103835_f_at | AF085192 | Hpcal1           | hippocalcin-like 1                                                                                                                                           |
| 160694_at   | U69599   | Ifngr2           | interferon gamma receptor 2                                                                                                                                  |
| 104215_at   | AA592069 | Atf6             | activating transcription factor 6                                                                                                                            |
| 94001_at    | U65735   | Elavl1           | ELAV (embryonic lethal, abnormal vision, Drosophila)-like 1 (Hu antigen R)                                                                                   |
| 94939_at    | X97227   | Cd53             | CD53 antigen                                                                                                                                                 |
| 94382_at    | AI851901 | 1110057K04Rik    | RIKEN cDNA 1110057K04 gene                                                                                                                                   |
| 160903_at   | U70210   | Apbb2            | amyloid beta (A4) precursor protein-binding, family B, member 2                                                                                              |
| 97197_r_at  | C78850   | Fv4 /// AI506816 | Friend virus susceptibility 4 /// expressed sequence AI506816 /// similar to melanoma antigen /// similar to melanoma antigen /// enve                       |
| 103209_at   | AF022889 | Ltbp1            | latent transforming growth factor beta binding protein 1                                                                                                     |
| 98575_at    | X13135   | Fasn             | fatty acid synthase                                                                                                                                          |
| 103332_at   | AI197507 | Gpr125           | G protein-coupled receptor 125                                                                                                                               |
| 92880_at    | M38337   | Mfge8            | milk fat globule-EGF factor 8 protein                                                                                                                        |
| 99598_g_at  | AI841629 | Gnai2            | guanine nucleotide binding protein, alpha inhibiting 2                                                                                                       |
| 97890_at    | AW046181 | Sgk              | serum/glucocorticoid regulated kinase                                                                                                                        |
| 160885_at   | AW120755 | Nucks1           | nuclear casein kinase and cyclin-dependent kinase substrate 1                                                                                                |
| 102134_f_at | AI461702 | Atp5g2 /// LOC62 | ATP synthase, H+ transporting, mitochondrial F0 complex, subunit c (subunit 9), isoform 2 /// similar to ATP synthase, H+ transportin                        |
| 96255_at    | AF067395 | Bnip3l           | BCL2/adenovirus E1B interacting protein 3-like                                                                                                               |
| 93010_at    | AJ250406 | Pqbp1            | polyglutamine binding protein 1                                                                                                                              |
| 100571_at   | AW123934 | Laptm4b          | lysosomal-associated protein transmembrane 4B                                                                                                                |
| 95349_g_at  | J04596   | Cxcl1            | chemokine (C-X-C motif) ligand 1                                                                                                                             |
| 97962_at    | AF041859 | Synj2            | synaptojanin 2                                                                                                                                               |
| 95412_at    | U49112   | Pdcd6            | programmed cell death 6                                                                                                                                      |
| 93693_at    | AI835373 | Hmbox1           | homeobox containing 1                                                                                                                                        |
| 104019_at   | AI851068 | ---              | ---                                                                                                                                                          |
| 93714_f_at  | AI117211 | LOC630499 /// L  | LOC630499 /// L (similar to H-2 class I histocompatibility antigen, D-K alpha chain precursor (H-2D(K)) /// similar to H-2 class I histocompatibility antige |
| 93187_at    | AW048347 | Trim47           | tripartite motif protein 47                                                                                                                                  |
| 94713_at    | U81453   | Myo7a            | myosin VIIa                                                                                                                                                  |
| 104221_at   | AB017189 | Slc7a5           | solute carrier family 7 (cationic amino acid transporter, y+ system), member 5                                                                               |
| 92987_at    | M28383   | Slc4a3           | solute carrier family 4 (anion exchanger), member 3                                                                                                          |
| 97593_f_at  | C79694   | Fliih            | flightless I homolog (Drosophila)                                                                                                                            |
| 99677_at    | AI849559 | 2610042O14Rik    | RIKEN cDNA 2610042O14 gene                                                                                                                                   |
| 97203_at    | X61399   | Marcks1          | MARCKS-like 1                                                                                                                                                |
| 95754_at    | AI838216 | Mbtps1           | membrane-bound transcription factor peptidase, site 1                                                                                                        |
| 93530_at    | AI842807 | ---              | ---                                                                                                                                                          |
| 101014_at   | Y09864   | Ifnar2           | interferon (alpha and beta) receptor 2                                                                                                                       |
| 103363_at   | AW214244 | Tbn              | taube nuss                                                                                                                                                   |
| 97835_at    | AI842828 | Rarres2          | retinoic acid receptor responder (tazarotene induced) 2                                                                                                      |
| 102222_at   | AJ002730 | Utx              | ubiquitously transcribed tetratricopeptide repeat gene, X chromosome                                                                                         |
| 104708_at   | AI463490 | Tbl1x            | Transducin (beta)-like 1 X-linked                                                                                                                            |
| 102360_at   | AW214225 | Mthfr            | 5,10-methylenetetrahydrofolate reductase                                                                                                                     |
| 103726_at   | AI842264 | Yipf5            | Yip1 domain family, member 5                                                                                                                                 |
| 92989_f_at  | D86214   | Cadps            | Ca<2+>-dependent activator protein for secretion                                                                                                             |
| 95674_r_at  | AI851985 | Basp1            | brain abundant, membrane attached signal protein 1                                                                                                           |
| 93015_at    | X65021   | Gsta3            | glutathione S-transferase, alpha 3                                                                                                                           |
| 102398_at   | D21831   | Rxb              | retinoid X receptor beta                                                                                                                                     |
| 104755_at   | AJ242778 | Tnip1            | TNFAIP3 interacting protein 1                                                                                                                                |
| 104535_at   | AF090430 | Yme11            | YME1-like 1 (S. cerevisiae)                                                                                                                                  |
| 97260_at    | AW121489 | Arpp19           | cAMP-regulated phosphoprotein 19                                                                                                                             |
| 96244_at    | AB025313 | Uchl1            | ubiquitin carboxy-terminal hydrolase L1                                                                                                                      |
| 99942_s_at  | U28932   | Cnn1             | calponin 1                                                                                                                                                   |
| 99136_at    | X63535   | Axl              | AXL receptor tyrosine kinase                                                                                                                                 |
| 99991_at    | U31993   | Il17ra           | interleukin 17 receptor A                                                                                                                                    |
| 160324_at   | AI848299 | Rpa3             | replication protein A3                                                                                                                                       |

|             |          |                    |                                                                                                                                            |
|-------------|----------|--------------------|--------------------------------------------------------------------------------------------------------------------------------------------|
| 160134_at   | AI841275 | Adipor1            | adiponectin receptor 1                                                                                                                     |
| 101515_at   | AF006688 | Acox1              | acyl-Coenzyme A oxidase 1, palmitoyl                                                                                                       |
| 101787_f_at | X16672   | Ccrn4l             | CCR4 carbon catabolite repression 4-like (S. cerevisiae)                                                                                   |
| 93533_at    | AI853651 | Ssu72              | Ssu72 RNA polymerase II CTD phosphatase homolog (yeast)                                                                                    |
| 160215_at   | L12140   | Aes                | amino-terminal enhancer of split                                                                                                           |
| 94916_at    | AW122260 | Cyp51              | cytochrome P450, family 51                                                                                                                 |
| 102336_at   | AF060565 | Tmem131            | transmembrane protein 131                                                                                                                  |
| 94842_at    | AI853630 | Bimh               | bleomycin hydrolase                                                                                                                        |
| 102161_f_at | X58609   | H2-D1 /// H2-L /// | histocompatibility 2, D region locus 1 /// histocompatibility 2, D region /// histocompatibility 2, T region locus 22 /// MHC (A.CA/J(H-2K |
| 93076_at    | AW124171 | Csnk1a1            | casein kinase 1, alpha 1                                                                                                                   |
| 102208_at   | AI153959 | St3gal6            | ST3 beta-galactoside alpha-2,3-sialyltransferase 6                                                                                         |
| 103713_at   | AW124533 | Usp9x              | ubiquitin specific peptidase 9, X chromosome                                                                                               |
| 97972_at    | AB012161 | Rnf103             | ring finger protein 103                                                                                                                    |
| 104456_at   | AA863742 | 5730589K01Rik      | RIKEN cDNA 5730589K01 gene                                                                                                                 |
| 102327_at   | AF078705 | Aoc3               | amine oxidase, copper containing 3                                                                                                         |
| 96733_at    | AW124597 | Rap1gds1           | RAP1, GTP-GDP dissociation stimulator 1                                                                                                    |
| 94781_at    | V00714   | Hba-a1             | hemoglobin alpha, adult chain 1                                                                                                            |
| 162460_f_at | AV048486 | Igbbp1             | immunoglobulin (CD79A) binding protein 1                                                                                                   |
| 93991_at    | X07295   | Mdh2               | malate dehydrogenase 2, NAD (mitochondrial)                                                                                                |
| 104119_at   | AI845028 | 2610024E20Rik      | RIKEN cDNA 2610024E20 gene                                                                                                                 |
| 101464_at   | V00755   | Timp1              | tissue inhibitor of metalloproteinase 1                                                                                                    |
| 96025_g_at  | L32836   | Ahcy               | S-adenosylhomocysteine hydrolase                                                                                                           |
| 96862_at    | AI848584 | 1110002B05Rik      | RIKEN cDNA 1110002B05 gene                                                                                                                 |
| 96192_at    | AF062567 | Sp3                | trans-acting transcription factor 3                                                                                                        |
| 94490_at    | AW122419 | Cnot8              | CCR4-NOT transcription complex, subunit 8                                                                                                  |
| 95897_at    | AW061228 | Atp2c1             | ATPase, Ca++-sequestering                                                                                                                  |
| 95489_at    | AW047953 | Fliih              | flightless I homolog (Drosophila)                                                                                                          |
| 99071_at    | L20315   | Mpeg1 /// LOC67    | macrophage expressed gene 1 /// similar to macrophage expressed gene 1                                                                     |
| 103930_at   | AI413179 | BC004022           | cDNA sequence BC004022                                                                                                                     |
| 95722_at    | AB013137 | Glrx               | glutaredoxin                                                                                                                               |
| 93493_at    | X65627   | Ddx5               | DEAD (Asp-Glu-Ala-Asp) box polypeptide 5                                                                                                   |
| 97904_at    | AW123953 | Actr3              | ARP3 actin-related protein 3 homolog (yeast)                                                                                               |
| 103341_at   | U49350   | Ctps               | cytidine 5'-triphosphate synthase                                                                                                          |
| 92559_at    | U12884   | Vcam1              | vascular cell adhesion molecule 1                                                                                                          |
| 103921_i_at | AI839690 | Cyb5r1             | cytochrome b5 reductase 1                                                                                                                  |
| 93427_at    | AW122310 | Myo1d              | myosin ID                                                                                                                                  |
| 160169_at   | AI851407 | Plaa               | phospholipase A2, activating protein                                                                                                       |
| 94469_at    | AW120950 | Mat2b              | methionine adenosyltransferase II, beta                                                                                                    |
| 100933_at   | D45208   | Stx1a              | syntaxin 1A (brain)                                                                                                                        |
| 101861_at   | AF031919 | Sgce               | sarcoglycan, epsilon                                                                                                                       |
| 103789_at   | AI854614 | Brd4               | bromodomain containing 4                                                                                                                   |
| 93326_at    | D26483   | Tspan7             | tetraspanin 7                                                                                                                              |
| 96881_at    | AW049394 | Comm6              | COMM domain containing 6                                                                                                                   |
| 95117_at    | U04710   | Igf2r              | insulin-like growth factor 2 receptor                                                                                                      |
| 93255_at    | X80937   | Ralbp1             | ralA binding protein 1                                                                                                                     |
| 102302_at   | L16992   | Bckdhb             | branched chain ketoacid dehydrogenase E1, beta polypeptide                                                                                 |
| 99102_at    | U67874   | Usp9x              | ubiquitin specific peptidase 9, X chromosome                                                                                               |
| 160064_at   | AF056323 | Stx7               | syntaxin 7                                                                                                                                 |
| 98154_at    | AW050133 | Gtf3c2             | general transcription factor IIIC, polypeptide 2, beta                                                                                     |
| 97425_at    | AI840191 | 2210409B22Rik      | RIKEN cDNA 2210409B22 gene                                                                                                                 |
| 95743_at    | AI846078 | Paip2              | polyadenylate-binding protein-interacting protein 2                                                                                        |
| 96888_at    | AI839814 | Akr1a4             | aldo-keto reductase family 1, member A4 (aldehyde reductase)                                                                               |
| 93571_at    | M74773   | Spnb2              | spectrin beta 2                                                                                                                            |
| 161522_i_at | AV218205 | Cst3               | cystatin C                                                                                                                                 |
| 160520_at   | X80508   | Yap1               | yes-associated protein 1                                                                                                                   |
| 95571_at    | AF004100 | Slc30a4            | solute carrier family 30 (zinc transporter), member 4                                                                                      |
| 95939_i_at  | AW047237 | BC052328           | cDNA sequence BC052328                                                                                                                     |
| 93774_at    | AW049040 | 2610524G07Rik      | RIKEN cDNA 2610524G07 gene                                                                                                                 |
| 98028_at    | M63649   | Twist1             | twist gene homolog 1 (Drosophila)                                                                                                          |
| 93277_at    | X53584   | Hspd1              | heat shock protein 1 (chaperonin)                                                                                                          |
| 98331_at    | X52046   | Col3a1             | procollagen, type III, alpha 1                                                                                                             |
| 99025_at    | L25125   | Ddx19a             | DEAD (Asp-Glu-Ala-Asp) box polypeptide 19a                                                                                                 |
| 104627_at   | AW121668 | Cds2               | CDP-diacylglycerol synthase (phosphatidate cytidylyltransferase) 2                                                                         |
| 96873_at    | AI843287 | Tax1bp1            | Tax1 (human T-cell leukemia virus type I) binding protein 1                                                                                |
| 104606_at   | M55561   | Cd52               | CD52 antigen                                                                                                                               |
| 93970_at    | AI843085 | Ipo7               | importin 7                                                                                                                                 |

|             |          |                  |                                                                                                                               |
|-------------|----------|------------------|-------------------------------------------------------------------------------------------------------------------------------|
| 99586_at    | U10098   | Cst3             | cystatin C                                                                                                                    |
| 101499_at   | U94479   | Ilk              | integrin linked kinase                                                                                                        |
| 101113_at   | AI846668 | Rhoa             | ras homolog gene family, member A                                                                                             |
| 101960_at   | AI842208 | D10Wsu52e        | DNA segment, Chr 10, Wayne State University 52, expressed                                                                     |
| 95785_s_at  | Y13361   | Rab7             | RAB7, member RAS oncogene family                                                                                              |
| 96653_at    | AI851762 | Rnaset2          | ribonuclease T2                                                                                                               |
| 99141_at    | U09816   | Gm2a             | GM2 ganglioside activator protein                                                                                             |
| 95508_at    | X61453   | Nckap1           | NCK-associated protein 1                                                                                                      |
| 99440_at    | Y07686   | Nfib             | nuclear factor I/B                                                                                                            |
| 102811_at   | X96639   | Ext1             | exostoses (multiple) 1                                                                                                        |
| 102812_i_at | AW210346 | Ube1dc1          | ubiquitin-activating enzyme E1-domain containing 1                                                                            |
| 98931_at    | AW123589 | Gns              | glucosamine (N-acetyl)-6-sulfatase                                                                                            |
| 160493_at   | D16432   | Cd63             | Cd63 antigen                                                                                                                  |
| 95434_at    | AI851740 | Arpc3            | actin related protein 2/3 complex, subunit 3                                                                                  |
| 98928_at    | AW122820 | Coro1b           | coronin, actin binding protein 1B                                                                                             |
| 99158_at    | U58888   | Ostf1            | osteoclast stimulating factor 1                                                                                               |
| 161070_at   | AI851250 | Spred2           | sprouty-related, EVH1 domain containing 2                                                                                     |
| 96112_at    | AI851178 | Etf1             | electron transferring flavoprotein, alpha polypeptide                                                                         |
| 99462_at    | D38046   | Top2b            | topoisomerase (DNA) II beta                                                                                                   |
| 97755_at    | U19880   | Drd4             | dopamine receptor 4                                                                                                           |
| 99558_at    | U62638   | Ccnc             | cyclin C                                                                                                                      |
| 101527_at   | M18209   | Tcea1            | transcription elongation factor A (SII) 1                                                                                     |
| 96755_at    | AA638002 | Etf1             | Eukaryotic translation termination factor 1                                                                                   |
| 95478_at    | AW124231 | Deb1             | differentially expressed in B16F10 1                                                                                          |
| 104403_at   | AI854118 | ---              | ---                                                                                                                           |
| 93541_at    | Z68618   | Tagln            | transgelin                                                                                                                    |
| 95052_at    | AI839150 | C1qdc2           | C1q domain containing 2                                                                                                       |
| 160931_at   | AW120468 | Dnm1l            | dynamin 1-like                                                                                                                |
| 97262_at    | AW050305 | Csnk1d           | casein kinase 1, delta                                                                                                        |
| 160678_at   | AA871166 | Tspan12          | tetraspanin 12                                                                                                                |
| 93511_at    | L38971   | Itm2a            | integral membrane protein 2A                                                                                                  |
| 104533_at   | AA764261 | Pim1             | proviral integration site 1                                                                                                   |
| 95709_at    | AW012491 | Vkorc1           | vitamin K epoxide reductase complex, subunit 1                                                                                |
| 104129_at   | AI462001 | Cyp4f13          | cytochrome P450, family 4, subfamily f, polypeptide 13                                                                        |
| 97297_at    | AI841858 | Pcp4l1           | Purkinje cell protein 4-like 1                                                                                                |
| 160270_at   | AW108371 | Lman1            | lectin, mannose-binding, 1                                                                                                    |
| 94346_at    | AI853721 | Wtap             | Wilms' tumour 1-associating protein                                                                                           |
| 97941_at    | Y12582   | Capn6            | calpain 6                                                                                                                     |
| 93646_at    | U82324   | Ptk9             | protein tyrosine kinase 9                                                                                                     |
| 100488_at   | M24119   | Gba              | glucosidase, beta, acid                                                                                                       |
| 104697_at   | AW121127 | Rhoj             | ras homolog gene family, member J                                                                                             |
| 97945_at    | M16118   | Tcra /// A130082 | T-cell receptor alpha chain /// RIKEN cDNA A130082M07 gene /// RIKEN cDNA A430107P09 gene                                     |
| 98405_at    | U96700   | Serpinh9         | serine (or cysteine) peptidase inhibitor, clade B, member 9                                                                   |
| 160569_at   | AI848235 | 2310008M10Rik    | RIKEN cDNA 2310008M10 gene                                                                                                    |
| 160571_at   | AF020039 | ldh1             | isocitrate dehydrogenase 1 (NADP+), soluble                                                                                   |
| 92350_at    | AA165759 | Mapre1           | microtubule-associated protein, RP/EB family, member 1                                                                        |
| 93095_at    | U00431   | Hmgbl /// LOC66  | high mobility group box 1 /// similar to High mobility group protein 1 (HMG-1) (High mobility group protein B1) (Amphoterin-) |
| 94324_f_at  | U49878   | Hmgcl            | 3-hydroxy-3-methylglutaryl-Coenzyme A lyase                                                                                   |
| 103296_at   | Y18243   | Cst9             | cystatin 9                                                                                                                    |
| 94501_at    | AI835784 | Sgpp1            | sphingosine-1-phosphate phosphatase 1                                                                                         |
| 101923_at   | U34277   | Pla2g7           | phospholipase A2, group VII (platelet-activating factor acetylhydrolase, plasma)                                              |
| 96861_at    | AI852376 | Mrp150           | mitochondrial ribosomal protein L50                                                                                           |
| 94236_at    | AI838152 | Nisch            | nischarin                                                                                                                     |
| 101584_at   | X63039   | Rsu1             | Ras suppressor protein 1                                                                                                      |
| 160654_at   | AI839899 | 2310073E15Rik    | RIKEN cDNA 2310073E15 gene                                                                                                    |
| 104745_at   | AA763874 | Arl6ip2          | ADP-ribosylation factor-like 6 interacting protein 2                                                                          |
| 101877_at   | AI854432 | Slc31a1          | solute carrier family 31, member 1                                                                                            |
| 95679_at    | AI835912 | Cdk2ap2          | CDK2-associated protein 2                                                                                                     |
| 98441_at    | L23971   | Fmr1             | fragile X mental retardation syndrome 1 homolog                                                                               |
| 93575_at    | AF051102 | Ggh /// LOC6673  | gamma-glutamyl hydrolase /// similar to Gamma-glutamyl hydrolase precursor (Gamma-Glu-x carboxypeptidase) (Conjugase) (GH) (  |
| 160915_at   | AW125175 | B4galt3          | UDP-Gal:betaGlcNAc beta 1,4-galactosyltransferase, polypeptide 3                                                              |
| 97958_at    | AW122355 | Prkcbp1          | protein kinase C binding protein 1                                                                                            |
| 104452_at   | AI845896 | Fstl3            | follistatin-like 3                                                                                                            |
| 102364_at   | J04509   | Jund1            | Jun proto-oncogene related gene d1                                                                                            |
| 102791_at   | U22033   | Psmb8            | proteasome (prosome, macropain) subunit, beta type 8 (large multifunctional peptidase 7)                                      |
| 162260_at   | AV341723 | 6330407G11Rik    | RIKEN cDNA 6330407G11 gene                                                                                                    |

|             |          |                 |                                                                                                                               |
|-------------|----------|-----------------|-------------------------------------------------------------------------------------------------------------------------------|
| 93488_at    | AI840579 | Tsr1            | TSR1, 20S rRNA accumulation, homolog (yeast)                                                                                  |
| 104445_at   | AW046694 | 4631408O11Rik   | RIKEN cDNA 4631408O11 gene                                                                                                    |
| 96741_at    | AW124129 | Phf12           | PHD finger protein 12                                                                                                         |
| 104179_at   | AI788669 | AI788669        | expressed sequence AI788669                                                                                                   |
| 95647_f_at  | AI465845 | Mobk1b          | MOB1, Mps One Binder kinase activator-like 1B (yeast)                                                                         |
| 98094_f_at  | AI843627 | Amfr            | autocrine motility factor receptor                                                                                            |
| 93546_s_at  | D14572   | Cbfb            | core binding factor beta                                                                                                      |
| 162358_i_at | AV218217 | Slc25a1         | solute carrier family 25 (mitochondrial carrier, citrate transporter), member 1                                               |
| 103440_at   | AW226540 | Gabpa           | GA repeat binding protein, alpha                                                                                              |
| 93738_at    | M22998   | Slc2a1          | solute carrier family 2 (facilitated glucose transporter), member 1                                                           |
| 95457_at    | AI854214 | Impad1          | inositol monophosphatase domain containing 1                                                                                  |
| 93914_at    | M20658   | Il1r1           | interleukin 1 receptor, type I                                                                                                |
| 102906_at   | L38444   | Tgtp            | T-cell specific GTPase                                                                                                        |
| 102423_at   | AI649125 | Uxs1            | UDP-glucuronate decarboxylase 1                                                                                               |
| 94238_at    | AW228316 | Prss23          | protease, serine, 23                                                                                                          |
| 101106_at   | AI853331 | E430034L04Rik   | RIKEN cDNA E430034L04 gene                                                                                                    |
| 100345_f_at | W65964   | Vamp8           | vesicle-associated membrane protein 8                                                                                         |
| 102056_f_at | AA839379 | 2610002J02Rik   | RIKEN cDNA 2610002J02 gene                                                                                                    |
| 97468_at    | AB025409 | Cks1b           | CDC28 protein kinase 1b                                                                                                       |
| 102797_at   | X95281   | Dhrs3           | dehydrogenase/reductase (SDR family) member 3                                                                                 |
| 96852_at    | AW122197 | Prkar1a         | protein kinase, cAMP dependent regulatory, type I, alpha                                                                      |
| 104451_at   | AI852578 | Slc11a2         | solute carrier family 11 (proton-coupled divalent metal ion transporters), member 2                                           |
| 94975_at    | AI845607 | Ireb2           | iron responsive element binding protein 2                                                                                     |
| 93543_f_at  | J03952   | Gstm1           | glutathione S-transferase, mu 1                                                                                               |
| 104241_at   | AI854379 | Mef2d           | myocyte enhancer factor 2D                                                                                                    |
| 160538_at   | L01640   | Cdk4 /// LOC640 | cyclin-dependent kinase 4 /// similar to Cell division protein kinase 4 (Cyclin-dependent kinase 4) (PSK-J3) (CRK3)           |
| 94915_at    | X58990   | Ppib            | peptidylprolyl isomerase B                                                                                                    |
| 92257_at    | AF000998 | Clock           | circadian locomotor output cycles kaput                                                                                       |
| 160474_at   | AW046278 | Rpp14           | ribonuclease P 14 subunit (human)                                                                                             |
| 160484_at   | AI840118 | Rtn4            | reticulon 4                                                                                                                   |
| 101112_g_at | AF014371 | Rhoa /// LOC433 | ras homolog gene family, member A /// similar to aplysia ras-related homolog A2 /// similar to aplysia ras-related homolog A2 |
| 98025_at    | M34896   | Evi2a           | ecotropic viral integration site 2a                                                                                           |
| 95521_s_at  | AB024005 | Zfp68           | zinc finger protein 68                                                                                                        |
| 160109_at   | X70298   | Sox4 /// LOC672 | SR-Y-box containing gene 4 /// similar to Transcription factor SOX-4                                                          |
| 95608_at    | AI851255 | Ctsb            | cathepsin B                                                                                                                   |
| 94796_at    | AA710643 | ---             | ---                                                                                                                           |
| 92768_s_at  | M15268   | Alas2           | aminolevulinic acid synthase 2, erythroid                                                                                     |
| 94286_at    | AW050340 | 9130011J15Rik   | RIKEN cDNA 9130011J15 gene                                                                                                    |
| 93312_at    | AW124623 | Ube2g1          | ubiquitin-conjugating enzyme E2G 1 (UBC7 homolog, C. elegans)                                                                 |
| 99935_at    | D14340   | Tjp1            | tight junction protein 1                                                                                                      |
| 102767_at   | AW121700 | Gng12           | guanine nucleotide binding protein (G protein), gamma 12                                                                      |
| 102848_f_at | AI840577 | 2610524H06Rik   | RIKEN cDNA 2610524H06 gene                                                                                                    |
| 104354_at   | X06368   | Csf1r           | colony stimulating factor 1 receptor                                                                                          |
| 95501_at    | AW122970 | 2410001C21Rik   | RIKEN cDNA 2410001C21 gene                                                                                                    |
| 93971_f_at  | AI838669 | Psmc12          | proteasome (prosome, macropain) 26S subunit, non-ATPase, 12                                                                   |
| 104592_i_at | AI595996 | Mef2c           | myocyte enhancer factor 2C                                                                                                    |
| 98881_at    | AI853675 | Hdh2            | haloacid dehalogenase-like hydrolase domain containing 2                                                                      |
| 97301_at    | AW124187 | Rab14           | RAB14, member RAS oncogene family                                                                                             |
| 100713_at   | AB020542 | Zfp617          | zinc finger protein 617                                                                                                       |
| 96663_at    | X92842   | Surf6           | surfeit gene 6                                                                                                                |
| 94473_at    | AW047951 | Pttg1ip         | pituitary tumor-transforming 1 interacting protein                                                                            |
| 160497_at   | AW060728 | 1810059G22Rik   | RIKEN cDNA 1810059G22 gene                                                                                                    |
| 100594_at   | AB008895 | Pigq            | phosphatidylinositol glycan, class Q                                                                                          |
| 160463_at   | X51829   | Myd116          | myeloid differentiation primary response gene 116                                                                             |
| 100555_at   | AI846152 | Dscr1           | Down syndrome critical region homolog 1 (human)                                                                               |
| 96672_at    | AW123564 | Hod             | homeobox only domain                                                                                                          |
| 160711_at   | AI844846 | Decr1           | 2,4-dienoyl CoA reductase 1, mitochondrial                                                                                    |
| 161021_at   | U39738   | Pak3            | p21 (CDKN1A)-activated kinase 3                                                                                               |
| 93982_at    | AW122476 | Der1            | Der1-like domain family, member 1                                                                                             |
| 103756_at   | AA832886 | BC023829        | cDNA sequence BC023829                                                                                                        |
| 92365_at    | X99572   | Figf            | c-fos induced growth factor                                                                                                   |
| 99100_at    | AI837104 | Stat3           | signal transducer and activator of transcription 3                                                                            |
| 97932_f_at  | D89290   | Cd151           | CD151 antigen                                                                                                                 |
| 103655_at   | AF074882 | Hdac3           | histone deacetylase 3                                                                                                         |
| 98429_at    | AB009653 | Lypla2          | lysophospholipase 2                                                                                                           |
| 96699_at    | X53476   | Hmgn1           | high mobility group nucleosomal binding domain 1                                                                              |

|             |          |                  |                                                                                                                                         |
|-------------|----------|------------------|-----------------------------------------------------------------------------------------------------------------------------------------|
| 97771_r_at  | AA733372 | D6Wsu176e        | DNA segment, Chr 6, Wayne State University 176, expressed                                                                               |
| 94359_at    | AI849556 | Plekha1          | pleckstrin homology domain containing, family A (phosphoinositide binding specific) member 1                                            |
| 93029_at    | U68564   | ldh3g            | isocitrate dehydrogenase 3 (NAD+), gamma                                                                                                |
| 97226_at    | AW125649 | Gna12            | guanine nucleotide binding protein, alpha 12                                                                                            |
| 96945_at    | U73143   | Snap23           | synaptosomal-associated protein 23                                                                                                      |
| 104759_at   | AI851421 | 1200011118Rik    | RIKEN cDNA 1200011118 gene                                                                                                              |
| 104132_at   | AW047276 | Cox4nb           | COX4 neighbor                                                                                                                           |
| 96086_at    | AW122530 | 1110031B06Rik    | RIKEN cDNA 1110031B06 gene                                                                                                              |
| 94536_s_at  | AI843417 | 2900073G15Rik    | RIKEN cDNA 2900073G15 gene /// myosin light chain, regulatory B                                                                         |
| 97515_at    | X89998   | Hsd17b4          | hydroxysteroid (17-beta) dehydrogenase 4                                                                                                |
| 101044_at   | X13752   | Alad             | aminolevulinatase, delta-, dehydratase                                                                                                  |
| 103817_at   | AJ006469 | Crtap            | cartilage associated protein                                                                                                            |
| 160115_at   | AF052660 | Txn1             | thioredoxin-like 1                                                                                                                      |
| 96331_at    | AI842754 | Snx2             | sorting nexin 2                                                                                                                         |
| 101002_at   | AF032128 | Azin1            | antizyme inhibitor 1                                                                                                                    |
| 96948_at    | AI845337 | Qdpr             | quininoid dihydropteridine reductase                                                                                                    |
| 100528_at   | AI852278 | Ube2h            | ubiquitin-conjugating enzyme E2H                                                                                                        |
| 161858_f_at | AV338260 | Rb1              | retinoblastoma 1                                                                                                                        |
| 96736_at    | AI850370 | Lpp              | LIM domain containing preferred translocation partner in lipoma                                                                         |
| 96693_at    | AI849453 | Rars             | arginyl-tRNA synthetase                                                                                                                 |
| 99970_at    | D37801   | Ptpn21           | protein tyrosine phosphatase, non-receptor type 21                                                                                      |
| 93069_at    | U62483   | Ube2d2           | ubiquitin-conjugating enzyme E2D 2                                                                                                      |
| 160834_at   | AI847051 | Sertad1          | SERTA domain containing 1                                                                                                               |
| 96594_at    | AA615831 | ---              | ---                                                                                                                                     |
| 102196_at   | U37413   | Gna11            | guanine nucleotide binding protein, alpha 11                                                                                            |
| 103404_at   | AW122831 | Rere             | arginine glutamic acid dipeptide (RE) repeats                                                                                           |
| 92934_at    | X79828   | Zfp90            | zinc finger protein 90                                                                                                                  |
| 100902_at   | AI846549 | 2610019F03Rik    | RIKEN cDNA 2610019F03 gene                                                                                                              |
| 96696_at    | AI837110 | Prmt1            | protein arginine N-methyltransferase 1                                                                                                  |
| 101081_at   | AJ010483 | Ctbp1            | C-terminal binding protein 1                                                                                                            |
| 93818_g_at  | AB025218 | Tmed2            | transmembrane emp24 domain trafficking protein 2                                                                                        |
| 95609_at    | AA869927 | ---              | ---                                                                                                                                     |
| 103947_at   | AW048038 | Ppp6c            | protein phosphatase 6, catalytic subunit                                                                                                |
| 93484_at    | AW061306 | Gramd3           | GRAM domain containing 3                                                                                                                |
| 102784_at   | AI843949 | 4632413K17Rik    | RIKEN cDNA 4632413K17 gene                                                                                                              |
| 99596_f_at  | M13963   | Gnai2            | guanine nucleotide binding protein, alpha inhibiting 2                                                                                  |
| 100477_at   | M32486   | Tmem45a          | transmembrane protein 45a                                                                                                               |
| 160889_at   | AI846313 | 8430437G11Rik    | RIKEN cDNA 8430437G11 gene                                                                                                              |
| 160395_at   | AW046672 | Nudcd2           | NudC domain containing 2                                                                                                                |
| 92818_at    | AF077330 | Ube1c            | ubiquitin-activating enzyme E1C                                                                                                         |
| 160468_at   | D78188   | Mtpn             | myotrophin                                                                                                                              |
| 101991_at   | D16215   | Fmo1             | flavin containing monooxygenase 1                                                                                                       |
| 98344_f_at  | AI850438 | LOC245297 /// L  | similar to RIKEN cDNA 6030426L16 /// similar to gonadotropin inducible ovarian transcription factor 1                                   |
| 104390_at   | AI836916 | Anp32a           | acidic (leucine-rich) nuclear phosphoprotein 32 family, member A                                                                        |
| 96289_at    | AW061287 | Stoml2           | stomatin (Epb7.2)-like 2                                                                                                                |
| 98475_at    | U69262   | Matn2            | matrilin 2                                                                                                                              |
| 102885_at   | X96737   | Sybl1            | synaptobrevin like 1                                                                                                                    |
| 103256_at   | AI509811 | Ms4a4d           | membrane-spanning 4-domains, subfamily A, member 4D                                                                                     |
| 99992_at    | AI286698 | Il17ra           | interleukin 17 receptor A                                                                                                               |
| 104621_at   | AW046060 | 37320            | membrane-associated ring finger (C3HC4) 6                                                                                               |
| 99929_at    | U72141   | Ext2             | exostoses (multiple) 2                                                                                                                  |
| 96123_at    | X99347   | Lbp              | lipopolysaccharide binding protein                                                                                                      |
| 98926_at    | AI838601 | Vamp2            | vesicle-associated membrane protein 2                                                                                                   |
| 95078_at    | AI841400 | 1200015F23Rik    | RIKEN cDNA 1200015F23 gene                                                                                                              |
| 160435_at   | AW050035 | Cd99l2           | Cd99 antigen-like 2                                                                                                                     |
| 103513_at   | M89799   | Wnt5b            | wingless-related MMTV integration site 5B                                                                                               |
| 96016_at    | AW045665 | 2700094K13Rik    | RIKEN cDNA 2700094K13 gene                                                                                                              |
| 93215_at    | AF061346 | Tnfaip1          | tumor necrosis factor, alpha-induced protein 1 (endothelial)                                                                            |
| 161270_i_at | AV319920 | Wnk1             | WNK lysine deficient protein kinase 1                                                                                                   |
| 96825_at    | AI854794 | Tenc1            | tensin like C1 domain-containing phosphatase                                                                                            |
| 93907_f_at  | M17551   | Ccrn4l /// Sgip1 | CCR4 carbon catabolite repression 4-like (S. cerevisiae) /// SH3-domain GRB2-like (endophilin) interacting protein 1 /// pol polyprotei |
| 94909_at    | AW046919 | Mrps17           | mitochondrial ribosomal protein S17                                                                                                     |
| 93362_at    | U27106   | Ap2m1            | adaptor protein complex AP-2, mu1                                                                                                       |
| 97261_at    | AF055664 | Dnaja1           | DnaJ (Hsp40) homolog, subfamily A, member 1                                                                                             |
| 99167_at    | AW122550 | Comm4            | COMM domain containing 4                                                                                                                |
| 160249_at   | U44426   | Tpd52            | tumor protein D52                                                                                                                       |

|             |          |                  |                                                                                                                                                |
|-------------|----------|------------------|------------------------------------------------------------------------------------------------------------------------------------------------|
| 92806_at    | AI843868 | Pdrg1            | p53 and DNA damage regulated 1                                                                                                                 |
| 94509_at    | AI851207 | Ncbp2            | nuclear cap binding protein subunit 2                                                                                                          |
| 101426_at   | AW125333 | Cerk             | ceramide kinase                                                                                                                                |
| 94794_at    | X52561   | Fth1             | ferritin heavy chain 1                                                                                                                         |
| 104242_f_at | AI835622 | 6530401N04Rik    | RIKEN cDNA 6530401N04 gene                                                                                                                     |
| 161111_f_at | AV238668 | Dhh              | desert hedgehog                                                                                                                                |
| 160472_r_at | AI837838 | Tmeff1           | transmembrane protein with EGF-like and two follistatin-like domains 1                                                                         |
| 100718_at   | X56135   | Ptma             | prothymosin alpha                                                                                                                              |
| 93254_at    | AI839142 | Mapk1            | mitogen activated protein kinase 1                                                                                                             |
| 101583_at   | M64292   | Btg2             | B-cell translocation gene 2, anti-proliferative                                                                                                |
| 98056_at    | AI846214 | Phlda3           | pleckstrin homology-like domain, family A, member 3                                                                                            |
| 97594_r_at  | C79694   | Fliih            | flightless I homolog (Drosophila)                                                                                                              |
| 94537_at    | AI838859 | Mylc2b           | myosin light chain, regulatory B                                                                                                               |
| 160362_at   | AW124835 | Mat2a            | methionine adenosyltransferase II, alpha                                                                                                       |
| 93728_at    | X62940   | Tsc22d1          | TSC22 domain family, member 1                                                                                                                  |
| 95432_f_at  | AI844034 | Tomm70a          | translocase of outer mitochondrial membrane 70 homolog A (yeast)                                                                               |
| 93795_at    | AW124626 | Itpa             | inosine triphosphatase (nucleoside triphosphate pyrophosphatase)                                                                               |
| 102786_at   | AI849432 | Clcn3            | chloride channel 3                                                                                                                             |
| 104407_at   | L25274   | Alcam            | activated leukocyte cell adhesion molecule                                                                                                     |
| 93258_at    | M28666   | Hmbs             | hydroxymethylbilane synthase                                                                                                                   |
| 94284_at    | AW122731 | Cyb5r3           | cytochrome b5 reductase 3                                                                                                                      |
| 162114_f_at | AV367188 | Trfp             | Trf (TATA binding protein-related factor)-proximal protein homolog (Drosophila)                                                                |
| 98633_at    | AI854863 | Tmem43           | transmembrane protein 43                                                                                                                       |
| 102094_f_at | AI841270 | ---              | ---                                                                                                                                            |
| 94871_r_at  | AW124226 | Sar1b            | SAR1 gene homolog B (S. cerevisiae)                                                                                                            |
| 103711_at   | AI115399 | Casp9            | caspase 9                                                                                                                                      |
| 95479_at    | X95591   | C1d              | nuclear DNA binding protein                                                                                                                    |
| 92534_at    | U10551   | Gem              | GTP binding protein (gene overexpressed in skeletal muscle)                                                                                    |
| 98438_f_at  | X16202   | H2-Q7 /// H2-Q8  | /histocompatibility 2, Q region locus 7 /// histocompatibility 2, Q region locus 8 /// similar to H-2 class I histocompatibility antigen, Q7 a |
| 104059_at   | AI851751 | Chd8             | chromodomain helicase DNA binding protein 8                                                                                                    |
| 161327_f_at | AV104703 | Rpl10a /// LOC54 | ribosomal protein L10A /// similar to ribosomal protein L10a /// similar to ribosomal protein L10a //                                          |
| 103704_at   | AW047625 | Dhdh2            | DDHD domain containing 2                                                                                                                       |
| 97975_at    | D85612   | Nfat3            | nuclear factor of activated T-cells, cytoplasmic, calcineurin-dependent 3                                                                      |
| 100597_at   | AW049730 | Gyg              | glycogenin                                                                                                                                     |
| 95726_at    | AW120733 | Mlf2             | myeloid leukemia factor 2                                                                                                                      |
| 96264_at    | AW061235 | Wdr45l           | Wdr45 like                                                                                                                                     |
| 99139_at    | AW123783 | Vps26b           | vacuolar protein sorting 26 homolog B (yeast)                                                                                                  |
| 160700_i_at | AB013729 | Sema6c           | sema domain, transmembrane domain (TM), and cytoplasmic domain, (semaphorin) 6C                                                                |
| 95359_at    | M18186   | Hsp90ab1         | heat shock protein 90kDa alpha (cytosolic), class B member 1                                                                                   |
| 97885_at    | AB031386 | 1810009M01Rik    | RIKEN cDNA 1810009M01 gene                                                                                                                     |
| 97950_at    | X75129   | Xdh              | xanthine dehydrogenase                                                                                                                         |
| 99024_at    | U32395   | Mxd4             | Max dimerization protein 4                                                                                                                     |
| 96904_at    | AI848784 | Mrps7            | mitochondrial ribosomal protein S7                                                                                                             |
| 95474_at    | AW123850 | F2r              | coagulation factor II (thrombin) receptor                                                                                                      |
| 93083_at    | D63423   | Anxa5            | annexin A5                                                                                                                                     |
| 104316_at   | AI646098 | Gna13            | guanine nucleotide binding protein, alpha 13                                                                                                   |
| 101921_at   | D86563   | Rab4a            | RAB4A, member RAS oncogene family                                                                                                              |
| 100515_at   | X54056   | Furin            | furin (paired basic amino acid cleaving enzyme)                                                                                                |
| 100151_at   | L29441   | Serinc3          | serine incorporator 3                                                                                                                          |
| 160434_at   | AW122426 | Tmem9b           | TMEM9 domain family, member B                                                                                                                  |
| 100910_at   | M14689   | Surf2            | surfeit gene 2                                                                                                                                 |
| 95386_at    | AI847050 | Lycat            | lysocardiolipin acyltransferase                                                                                                                |
| 93528_s_at  | AI848050 | Klf9             | Kruppel-like factor 9                                                                                                                          |
| 102654_at   | X15763   | Gata1            | GATA binding protein 1                                                                                                                         |
| 92646_at    | U84903   | Mrp123           | mitochondrial ribosomal protein L23                                                                                                            |
| 103715_at   | U04354   | Scin             | scinderin                                                                                                                                      |
| 94845_at    | AW125736 | Zc3h11a          | zinc finger CCCH type containing 11A                                                                                                           |
| 96156_at    | AA874329 | 1110008H02Rik    | RIKEN cDNA 1110008H02 gene                                                                                                                     |
| 98923_at    | AI852608 | Rcl1             | RNA terminal phosphate cyclase-like 1                                                                                                          |
| 102754_at   | Y17267   | Birc6            | baculoviral IAP repeat-containing 6                                                                                                            |
| 160149_at   | AI841543 | Rab10            | RAB10, member RAS oncogene family                                                                                                              |
| 100033_at   | X81143   | Msh2             | mutS homolog 2 (E. coli)                                                                                                                       |
| 100961_at   | AF012871 | Kcnh2            | potassium voltage-gated channel, subfamily H (eag-related), member 2                                                                           |
| 104108_at   | AJ245569 | Rab6ip1          | Rab6 interacting protein 1                                                                                                                     |
| 93517_at    | Z18272   | Col6a2           | procollagen, type VI, alpha 2                                                                                                                  |
| 160677_at   | AI843114 | Gatad2a          | GATA zinc finger domain containing 2A                                                                                                          |

|             |          |                   |                                                                                                                                         |
|-------------|----------|-------------------|-----------------------------------------------------------------------------------------------------------------------------------------|
| 96778_at    | AA656775 | Rrs1              | RRS1 ribosome biogenesis regulator homolog (S. cerevisiae)                                                                              |
| 94127_at    | Y15910   | Diap2             | diaphanous homolog 2 (Drosophila)                                                                                                       |
| 103673_at   | M57891   | C2                | complement component 2 (within H-2S)                                                                                                    |
| 104042_at   | AI842275 | Slc35b2           | solute carrier family 35, member B2                                                                                                     |
| 98431_at    | AW049275 | Dusp12            | dual specificity phosphatase 12                                                                                                         |
| 100144_at   | X07699   | Ncl               | nucleolin                                                                                                                               |
| 93349_at    | X57337   | Pcolce            | procollagen C-endopeptidase enhancer protein                                                                                            |
| 101588_at   | AF058055 | Slc16a1           | solute carrier family 16 (monocarboxylic acid transporters), member 1                                                                   |
| 99465_at    | AJ132922 | Mecp2             | methyl CpG binding protein 2                                                                                                            |
| 104698_at   | U51335   | Gata6             | GATA binding protein 6                                                                                                                  |
| 102852_at   | M31131   | Cdh2              | cadherin 2                                                                                                                              |
| 104250_at   | AW121353 | Lrrc8a            | leucine rich repeat containing 8A                                                                                                       |
| 98532_at    | AF011644 | Cdk2ap1           | CDK2 (cyclin-dependent kinase 2)-associated protein 1                                                                                   |
| 100635_at   | L20294   | Sar1a             | SAR1 gene homolog A (S. cerevisiae)                                                                                                     |
| 160121_at   | AW125050 | Galk2             | galactokinase 2                                                                                                                         |
| 92816_r_at  | X03039   | Eif4a1            | eukaryotic translation initiation factor 4A1                                                                                            |
| 102794_at   | Z80112   | Cxcr4             | chemokine (C-X-C motif) receptor 4                                                                                                      |
| 160483_at   | U16322   | Tcf4              | transcription factor 4                                                                                                                  |
| 98884_r_at  | AI837311 | Ndel1             | nuclear distribution gene E-like homolog 1 (A. nidulans)                                                                                |
| 160092_at   | V00756   | Ifrd1             | interferon-related developmental regulator 1                                                                                            |
| 95040_at    | AI840810 | Pdcd6ip           | programmed cell death 6 interacting protein                                                                                             |
| 103356_at   | AI843267 | Dock7             | dedicator of cytokinesis 7                                                                                                              |
| 160236_at   | AI835624 | 9630044O09Rik     | RIKEN cDNA 9630044O09 gene                                                                                                              |
| 160688_at   | AW060175 | Golp3             | golgi phosphoprotein 3                                                                                                                  |
| 97464_at    | AI844416 | Zfp706            | zinc finger protein 706                                                                                                                 |
| 98031_at    | AF027707 | Bok               | Bcl-2-related ovarian killer protein                                                                                                    |
| 100048_at   | AW049685 | Rap1a /// LOC631  | RAS-related protein-1a /// similar to Ras-related protein Rap-1A (Ras-related protein Krev-1) /// similar to Ras-related protein Rap-1A |
| 100130_at   | X12761   | Jun               | Jun oncogene                                                                                                                            |
| 94340_at    | AW124224 | Xpot              | exportin, tRNA (nuclear export receptor for tRNAs)                                                                                      |
| 103486_at   | M15131   | Il1b              | interleukin 1 beta                                                                                                                      |
| 100878_at   | AW124985 | Strn3             | striatin, calmodulin binding protein 3                                                                                                  |
| 97205_at    | AI848056 | Eif3s1            | eukaryotic translation initiation factor 3, subunit 1 alpha                                                                             |
| 162457_f_at | AV003378 | Hba-a1            | hemoglobin alpha, adult chain 1                                                                                                         |
| 96651_at    | AF035263 | Smarce1           | SWI/SNF related, matrix associated, actin dependent regulator of chromatin, subfamily e, member 1                                       |
| 103853_at   | AI845664 | Grwd1             | glutamate-rich WD repeat containing 1                                                                                                   |
| 93670_at    | AW048233 | Erf               | Ets2 repressor factor                                                                                                                   |
| 95566_at    | AF050666 | Gpld1             | glycosylphosphatidylinositol specific phospholipase D1                                                                                  |
| 160535_at   | X78709   | Nfe2l1            | nuclear factor, erythroid derived 2,-like 1                                                                                             |
| 92686_at    | AF072758 | Slc27a3           | solute carrier family 27 (fatty acid transporter), member 3                                                                             |
| 161083_at   | AW121616 | Taok3             | TAO kinase 3                                                                                                                            |
| 160430_at   | M90364   | Ctnnb1            | catenin (cadherin associated protein), beta 1                                                                                           |
| 103735_at   | M89800   | Wnt6              | wingless-related MMTV integration site 6                                                                                                |
| 99543_s_at  | AJ133749 | Dguok             | deoxyguanosine kinase                                                                                                                   |
| 96278_at    | AI846553 | Prr13             | proline rich 13                                                                                                                         |
| 98465_f_at  | M31419   | Ifi204 /// LOC672 | interferon activated gene 204 /// similar to Interferon-activatable protein 204 (Ifi-204) (Interferon-inducible protein p204)           |
| 160199_at   | AF095257 | Hnrpc /// LOC620  | heterogeneous nuclear ribonucleoprotein C /// similar to heterogeneous nuclear ribonucleoprotein C /// similar to heterogeneous nucl    |
| 96875_r_at  | AI841410 | Tax1bp1           | Tax1 (human T-cell leukemia virus type I) binding protein 1                                                                             |
| 93126_at    | X04591   | Ckb               | creatine kinase, brain                                                                                                                  |
| 99610_at    | X93357   | Ss18              | synovial sarcoma translocation, Chromosome 18                                                                                           |
| 160518_at   | AI048434 | Rer1              | RER1 retention in endoplasmic reticulum 1 homolog (S. cerevisiae)                                                                       |
| 93309_at    | U42386   | Ddx3x             | DEAD/H (Asp-Glu-Ala-Asp/His) box polypeptide 3, X-linked                                                                                |
| 160286_at   | AA733594 | Dek               | DEK oncogene (DNA binding)                                                                                                              |
| 103261_at   | AB003503 | Gspt2             | G1 to S phase transition 2                                                                                                              |
| 97977_at    | AA645293 | Ntn1              | netrin 1                                                                                                                                |
| 160287_at   | AI852557 | Map1lc3b          | microtubule-associated protein 1 light chain 3 beta                                                                                     |
| 96024_at    | L32836   | Ahcy              | S-adenosylhomocysteine hydrolase                                                                                                        |
| 94465_g_at  | AF029347 | Clcn3             | chloride channel 3                                                                                                                      |
| 101922_at   | AW123408 | Kdelr2            | KDEL (Lys-Asp-Glu-Leu) endoplasmic reticulum protein retention receptor 2                                                               |
| 97544_at    | D83037   | Ywhaz             | tyrosine 3-monooxygenase/tryptophan 5-monooxygenase activation protein, zeta polypeptide                                                |
| 103002_at   | M27923   | B4galt1           | UDP-Gal:betaGlcNAc beta 1,4- galactosyltransferase, polypeptide 1                                                                       |
| 103018_at   | AF096868 | Vdp               | vesicle docking protein                                                                                                                 |
| 97828_at    | AF033115 | Siva              | Cd27 binding protein (Hindu God of destruction)                                                                                         |
| 100343_f_at | M28729   | Tuba1             | tubulin, alpha 1                                                                                                                        |
| 99978_s_at  | D83073   | Mapk14            | mitogen activated protein kinase 14                                                                                                     |
| 101529_g_at | D00925   | Tcea1             | transcription elongation factor A (SII) 1                                                                                               |
| 93895_s_at  | M21530   | Itpr1             | inositol 1,4,5-triphosphate receptor 1                                                                                                  |

|             |          |               |            |                                                                                 |                                                             |                                                |                               |
|-------------|----------|---------------|------------|---------------------------------------------------------------------------------|-------------------------------------------------------------|------------------------------------------------|-------------------------------|
| 93290_at    | U35374   | Pnp           | LOC5450    | purine-nucleoside phosphorylase                                                 | /// similar to purine-nucleoside phosphorylase              | /// similar to purine-nucleoside phosphorylase |                               |
| 102790_at   | AB016490 | Jtb           |            | jumping translocation breakpoint                                                |                                                             |                                                |                               |
| 96688_at    | AI845463 | Tmem77        |            | transmembrane protein 77                                                        |                                                             |                                                |                               |
| 96607_at    | AW124902 | 1500003O03Rik |            | RIKEN cDNA 1500003O03 gene                                                      |                                                             |                                                |                               |
| 162424_f_at | AV291989 | Ddx17         |            | DEAD (Asp-Glu-Ala-Asp) box polypeptide 17                                       |                                                             |                                                |                               |
| 93621_at    | AA914350 | Tgif2         |            | TGFB-induced factor 2                                                           |                                                             |                                                |                               |
| 95433_at    | AW049776 | Ddx54         |            | DEAD (Asp-Glu-Ala-Asp) box polypeptide 54                                       |                                                             |                                                |                               |
| 103315_at   | AW120526 | Tnrc6a        |            | trinucleotide repeat containing 6a                                              |                                                             |                                                |                               |
| 101591_at   | AI852589 | Xpnppe1       |            | X-prolyl aminopeptidase (aminopeptidase P) 1, soluble                           |                                                             |                                                |                               |
| 94224_s_at  | M74123   | Ifi203        | /// Ifi204 | /// interferon activated gene 203                                               | /// interferon activated gene 204                           | /// similar to interferon activated gene 205   | /// interferon activated gene |
| 95023_at    | AW050353 | Sid2          |            | SID1 transmembrane family, member 2                                             |                                                             |                                                |                               |
| 104272_s_at | U85608   | Map3k4        |            | mitogen activated protein kinase kinase kinase 4                                |                                                             |                                                |                               |
| 161774_f_at | AV358770 | Lypla1        |            | lysophospholipase 1                                                             |                                                             |                                                |                               |
| 103672_at   | AW122572 | Phf23         |            | PHD finger protein 23                                                           |                                                             |                                                |                               |
| 97181_f_at  | M10062   | Ccm4l         | /// Sgip1  | /// CCR4 carbon catabolite repression 4-like (S. cerevisiae)                    | /// SH3-domain GRB2-like (endophilin) interacting protein 1 | /// pol polyprotei                             |                               |
| 160683_at   | AW049969 | Slc25a36      |            | solute carrier family 25, member 36                                             |                                                             |                                                |                               |
| 96813_f_at  | AI852973 | Otd5          |            | OTU domain containing 5                                                         |                                                             |                                                |                               |
| 99150_at    | AI844357 | Ict1          |            | immature colon carcinoma transcript 1                                           |                                                             |                                                |                               |
| 92560_g_at  | U12884   | Vcam1         |            | vascular cell adhesion molecule 1                                               |                                                             |                                                |                               |
| 96124_at    | AI835632 | Trak1         |            | trafficking protein, kinesin binding 1                                          |                                                             |                                                |                               |
| 97319_at    | AF084466 | Rrad          |            | Ras-related associated with diabetes                                            |                                                             |                                                |                               |
| 104569_at   | AW122024 | MIl1          |            | myeloid/lymphoid or mixed-lineage leukemia 1                                    |                                                             |                                                |                               |
| 103260_at   | AI838553 | 1110060D06Rik |            | RIKEN cDNA 1110060D06 gene                                                      | /// dedicator of cytokinesis 5                              |                                                |                               |
| 98615_at    | AW049570 | 0610041E09Rik |            | RIKEN cDNA 0610041E09 gene                                                      |                                                             |                                                |                               |
| 160100_at   | AI834847 | Efh2          |            | EF hand domain containing 2                                                     |                                                             |                                                |                               |
| 99378_f_at  | M18837   | H2-Q1         |            | histocompatibility 2, Q region locus 1                                          |                                                             |                                                |                               |
| 104558_at   | AA867123 | Rcor1         |            | REST corepressor 1                                                              |                                                             |                                                |                               |
| 102402_at   | AJ001261 | Gbas          |            | glioblastoma amplified sequence                                                 |                                                             |                                                |                               |
| 93274_at    | M38381   | Clk1          |            | CDC-like kinase 1                                                               |                                                             |                                                |                               |
| 92366_at    | U12147   | Lama2         |            | laminin, alpha 2                                                                |                                                             |                                                |                               |
| 93430_at    | AF000236 | Cmkor1        |            | chemokine orphan receptor 1                                                     |                                                             |                                                |                               |
| 102813_f_at | AW210346 | Ube1dc1       |            | ubiquitin-activating enzyme E1-domain containing 1                              |                                                             |                                                |                               |
| 100711_at   | U12403   | Rpl10a        |            | ribosomal protein L10A                                                          |                                                             |                                                |                               |
| 95444_at    | AW122274 | Tmem49        |            | transmembrane protein 49                                                        |                                                             |                                                |                               |
| 160322_at   | AW123666 | Tmco1         |            | transmembrane and coiled-coil domains 1                                         |                                                             |                                                |                               |
| 97506_at    | AI043016 | Rnf2          |            | ring finger protein 2                                                           |                                                             |                                                |                               |
| 92331_at    | M81591   | Mme           |            | membrane metallo endopeptidase                                                  |                                                             |                                                |                               |
| 94910_at    | AW120739 | Nde1          |            | nuclear distribution gene E homolog 1 (A nidulans)                              |                                                             |                                                |                               |
| 104749_at   | AW123623 | Rnf20         |            | ring finger protein 20                                                          |                                                             |                                                |                               |
| 97540_f_at  | M69069   | H2-D1         |            | histocompatibility 2, D region locus 1                                          |                                                             |                                                |                               |
| 94025_at    | AW045339 | Psmb3         |            | proteasome (prosome, macropain) subunit, beta type 3                            |                                                             |                                                |                               |
| 100086_at   | D00622   | Lrpap1        |            | low density lipoprotein receptor-related protein associated protein 1           |                                                             |                                                |                               |
| 103429_i_at | AW125330 | Adi1          |            | acireductone dioxygenase 1                                                      |                                                             |                                                |                               |
| 162032_f_at | AV368209 | Pkm2          | /// LOC671 | /// pyruvate kinase, muscle                                                     | /// similar to Pyruvate kinase isozyme M2                   |                                                |                               |
| 102385_at   | AA980618 | Wdr43         |            | WD repeat domain 43                                                             |                                                             |                                                |                               |
| 103207_at   | D13543   | Pola1         |            | polymerase (DNA directed), alpha 1                                              |                                                             |                                                |                               |
| 104434_at   | AW048552 | AA407659      |            | expressed sequence AA407659                                                     |                                                             |                                                |                               |
| 104766_at   | AI851198 | Nola1         |            | nucleolar protein family A, member 1 (H/ACA small nucleolar RNPs)               |                                                             |                                                |                               |
| 95694_at    | X70956   | Top1          |            | topoisomerase (DNA) I                                                           |                                                             |                                                |                               |
| 96750_at    | AW122179 | Ilkap         |            | integrin-linked kinase-associated serine/threonine phosphatase 2C               |                                                             |                                                |                               |
| 102040_at   | Y15798   | Gprk6         |            | G protein-coupled receptor kinase 6                                             |                                                             |                                                |                               |
| 96316_at    | AI839289 | Sumo2         | /// LOC23  | /// SMT3 suppressor of mif two 3 homolog 2 (yeast)                              | /// similar to SMT3 suppressor of mif two 3 homolog 2       | /// similar to small ubiquitin-li              |                               |
| 94807_at    | AI848354 | Slc25a1       |            | solute carrier family 25 (mitochondrial carrier, citrate transporter), member 1 |                                                             |                                                |                               |
| 160416_at   | U62545   | Fkbp3         |            | FK506 binding protein 3                                                         |                                                             |                                                |                               |
| 102368_at   | AW121186 | 2610208E05Rik |            | RIKEN cDNA 2610208E05 gene                                                      |                                                             |                                                |                               |
| 98468_r_at  | AI316859 | Brd1          |            | bromodomain containing 1                                                        |                                                             |                                                |                               |
| 93048_at    | AJ005253 | Clpp          |            | caseinolytic peptidase, ATP-dependent, proteolytic subunit homolog (E. coli)    |                                                             |                                                |                               |
| 104114_at   | AW122450 | Edem3         |            | ER degradation enhancer, mannosidase alpha-like 3                               |                                                             |                                                |                               |
| 93593_f_at  | U87948   | Emp3          |            | epithelial membrane protein 3                                                   |                                                             |                                                |                               |
| 104597_at   | AJ007970 | Gbp2          |            | guanylate nucleotide binding protein 2                                          |                                                             |                                                |                               |
| 103223_at   | AW120767 | Prkce         |            | protein kinase C, epsilon                                                       |                                                             |                                                |                               |
| 104153_at   | AW047743 | Ivd           |            | isovaleryl coenzyme A dehydrogenase                                             |                                                             |                                                |                               |
| 100154_at   | AI836367 | Tapbp         |            | TAP binding protein                                                             |                                                             |                                                |                               |
| 92184_at    | X95226   | Dtna          |            | dystrobrevin alpha                                                              |                                                             |                                                |                               |
| 95447_at    | AA683761 | 1810034K20Rik |            | RIKEN cDNA 1810034K20 gene                                                      |                                                             |                                                |                               |
| 98635_at    | AI854629 | Ube2z         |            | ubiquitin-conjugating enzyme E2Z (putative)                                     |                                                             |                                                |                               |

|             |          |                 |                                                                                                                                |
|-------------|----------|-----------------|--------------------------------------------------------------------------------------------------------------------------------|
| 96352_at    | AI848845 | 2400001E08Rik   | RIKEN cDNA 2400001E08 gene                                                                                                     |
| 95477_at    | AW125185 | Tmem59          | transmembrane protein 59                                                                                                       |
| 104094_at   | Y08361   | Pdlim4          | PDZ and LIM domain 4                                                                                                           |
| 99650_at    | X90945   | Csnk1a1         | casein kinase 1, alpha 1                                                                                                       |
| 102738_s_at | U07982   | Edn1            | endothelin 1                                                                                                                   |
| 100066_at   | U20892   | Gart            | phosphoribosylglycinamide formyltransferase                                                                                    |
| 97839_at    | AI841960 | Snx6            | sorting nexin 6                                                                                                                |
| 103456_at   | AI841800 | Ece1            | endothelin converting enzyme 1                                                                                                 |
| 97305_at    | AW123267 | Nip7            | nuclear import 7 homolog (S. cerevisiae)                                                                                       |
| 98087_at    | AW048562 | Tbk1            | TANK-binding kinase 1                                                                                                          |
| 97521_at    | M31690   | Ass1            | argininosuccinate synthetase 1                                                                                                 |
| 99087_at    | AW060179 | Zwint           | ZW10 interactor                                                                                                                |
| 94364_at    | AI847926 | Glg1            | golgi apparatus protein 1                                                                                                      |
| 96616_at    | AI891629 | Atad1           | ATPase family, AAA domain containing 1                                                                                         |
| 92907_at    | U49185   | Ocln            | occludin                                                                                                                       |
| 93169_at    | AW212708 | ---             | ---                                                                                                                            |
| 93819_at    | AI847269 | Tmed2           | transmembrane emp24 domain trafficking protein 2                                                                               |
| 92228_at    | D25282   | Ctnna2          | catenin (cadherin associated protein), alpha 2                                                                                 |
| 103634_at   | U51992   | lsgf3g          | interferon dependent positive acting transcription factor 3 gamma                                                              |
| 95517_i_at  | AI846338 | BC004004        | cDNA sequence BC004004                                                                                                         |
| 98144_f_at  | AI844321 | Tspan31         | tetraspanin 31                                                                                                                 |
| 160962_at   | W71352   | Bag2            | Bcl2-associated athanogene 2                                                                                                   |
| 162486_f_at | AV122030 | Dscr3           | Down syndrome critical region gene 3                                                                                           |
| 104678_at   | U19860   | Gas7            | growth arrest specific 7                                                                                                       |
| 102028_at   | AF053959 | Rassf5          | Ras association (RalGDS/AF-6) domain family 5                                                                                  |
| 95675_at    | AW121182 | Map4k3 /// LOC6 | mitogen-activated protein kinase kinase kinase kinase 3 /// similar to mitogen-activated protein kinase kinase kinase kinase 3 |
| 97422_at    | AW048882 | lars2           | isoleucine-tRNA synthetase 2, mitochondrial                                                                                    |
| 97207_f_at  | AI875934 | Lypla1          | lysophospholipase 1                                                                                                            |
| 103852_at   | AI848207 | 2900001O04Rik   | RIKEN cDNA 2900001O04 gene                                                                                                     |
| 104491_at   | AI509330 | Phtf2           | putative homeodomain transcription factor 2                                                                                    |
| 99624_at    | AW125517 | 9530068E07Rik   | RIKEN cDNA 9530068E07 gene                                                                                                     |
| 94256_at    | AI849533 | Clic4           | chloride intracellular channel 4 (mitochondrial)                                                                               |
| 95100_at    | AI847314 | Anapc5          | anaphase-promoting complex subunit 5                                                                                           |
| 93253_at    | D87271   | Mapk1           | mitogen activated protein kinase 1                                                                                             |
| 103721_at   | AA592182 | Npnt            | Nephronectin                                                                                                                   |
| 93547_at    | L03279   | Cbfb            | core binding factor beta                                                                                                       |
| 94456_at    | AI841497 | Set             | SET translocation                                                                                                              |
| 99940_at    | AW212667 | 2410004N11Rik   | RIKEN cDNA 2410004N11 gene                                                                                                     |
| 100095_at   | U37799   | Scarb1          | scavenger receptor class B, member 1                                                                                           |
| 95030_at    | D10214   | Prlr            | prolactin receptor                                                                                                             |
| 160118_at   | AF022432 | Mmp14           | matrix metalloproteinase 14 (membrane-inserted)                                                                                |
| 103328_at   | U59864   | Tank            | TRAF family member-associated NF-kappa B activator                                                                             |
| 103398_at   | AW123232 | Pxn             | paxillin                                                                                                                       |
| 160281_at   | AI840773 | Lsm14a          | LSM14 homolog A (SCD6, S. cerevisiae)                                                                                          |
| 97943_at    | AI747133 | Capn6           | calpain 6                                                                                                                      |
| 92444_f_at  | X16493   | Zfp1            | zinc finger protein 1                                                                                                          |
| 103446_at   | AA959954 | lfih1           | interferon induced with helicase C domain 1                                                                                    |
| 96754_s_at  | AI844751 | ---             | Transcribed locus                                                                                                              |
| 99562_at    | U87240   | Man2b1          | mannosidase 2, alpha B1                                                                                                        |
| 103875_at   | AA967717 | Ngrn            | neugrin, neurite outgrowth associated                                                                                          |
| 101459_at   | L10410   | Chd1            | chromodomain helicase DNA binding protein 1                                                                                    |
| 160643_at   | U31758   | Hdac2           | histone deacetylase 2                                                                                                          |
| 96667_at    | AI851542 | Vps41           | vacuolar protein sorting 41 (yeast)                                                                                            |
| 101886_f_at | X52490   | H2-D1           | histocompatibility 2, D region locus 1                                                                                         |
| 161615_f_at | AV352346 | ---             | ---                                                                                                                            |
| 95467_at    | AW120746 | Scoc            | short coiled-coil protein                                                                                                      |
| 93782_at    | AI844517 | Rnf4            | ring finger protein 4                                                                                                          |
| 103087_at   | L02331   | Sult1a1         | sulfotransferase family 1A, phenol-preferring, member 1                                                                        |
| 93742_at    | AW045476 | 5730449L18Rik   | RIKEN cDNA 5730449L18 gene                                                                                                     |
| 92592_at    | M25558   | Gpd1            | glycerol-3-phosphate dehydrogenase 1 (soluble)                                                                                 |
| 101058_at   | J00356   | Amy1            | amylase 1, salivary                                                                                                            |
| 103763_at   | AW121855 | Ash1l           | ash1 (absent, small, or homeotic)-like (Drosophila)                                                                            |
| 93120_f_at  | V00746   | H2-K1           | histocompatibility 2, K1, K region                                                                                             |
| 98476_at    | L40631   | 2900054D09Rik   | RIKEN cDNA 2900054D09 gene                                                                                                     |
| 160558_at   | U22445   | Akt2            | thymoma viral proto-oncogene 2                                                                                                 |
| 97549_at    | L29468   | Cfl2            | cofilin 2, muscle                                                                                                              |

|             |          |                    |                                                                                                                                                 |
|-------------|----------|--------------------|-------------------------------------------------------------------------------------------------------------------------------------------------|
| 104364_at   | AF039840 | Mapkap5            | MAP kinase-activated protein kinase 5                                                                                                           |
| 94770_at    | AI553596 | Otud5              | OTU domain containing 5                                                                                                                         |
| 93054_at    | AI846368 | Ankrd46            | ankyrin repeat domain 46                                                                                                                        |
| 101501_r_at | D87973   | Impact             | imprinted and ancient                                                                                                                           |
| 97758_at    | AB023564 | Prdx1              | peroxiredoxin 1                                                                                                                                 |
| 160455_s_at | AW123786 | Zwint              | ZW10 interactor                                                                                                                                 |
| 100088_at   | M27073   | Ppp1cb             | protein phosphatase 1, catalytic subunit, beta isoform                                                                                          |
| 93551_at    | AW121424 | Poir2l             | polymerase (RNA) II (DNA directed) polypeptide L                                                                                                |
| 101451_at   | AF038939 | Peg3               | paternally expressed 3                                                                                                                          |
| 98254_f_at  | AW209004 | Ccm4l /// Sgip1 // | CCR4 carbon catabolite repression 4-like (S. cerevisiae) /// SH3-domain GRB2-like (endophilin) interacting protein 1 /// Gag /// gag p          |
| 101137_at   | X76772   | Rps3               | ribosomal protein S3                                                                                                                            |
| 160789_at   | AW120525 | Edem2              | ER degradation enhancer, mannosidase alpha-like 2                                                                                               |
| 94228_at    | AW123788 | Xpo1               | exportin 1, CRM1 homolog (yeast)                                                                                                                |
| 96855_at    | AI839946 | Spcs2              | signal peptidase complex subunit 2 homolog (S. cerevisiae)                                                                                      |
| 160662_r_at | AA667100 | Gata6              | GATA binding protein 6                                                                                                                          |
| 97460_at    | AW122823 | Ube2r2             | ubiquitin-conjugating enzyme E2R 2                                                                                                              |
| 102283_at   | U05245   | Tiam1              | T-cell lymphoma invasion and metastasis 1                                                                                                       |
| 94106_at    | AI853048 | ---                | Transcribed locus                                                                                                                               |
| 96065_at    | D88769   | Lxn                | latexin                                                                                                                                         |
| 96257_at    | AW124376 | Hp1bp3             | heterochromatin protein 1, binding protein 3                                                                                                    |
| 101500_at   | AI834796 | Epb4.1l2           | Erythrocyte protein band 4.1-like 2                                                                                                             |
| 100469_at   | D78642   | NfyA               | nuclear transcription factor-Y alpha                                                                                                            |
| 96708_at    | AW120643 | Tmed3              | transmembrane emp24 domain containing 3                                                                                                         |
| 104313_at   | AI842432 | Pgm2               | phosphoglucomutase 2                                                                                                                            |
| 96258_at    | AI843448 | Mgst3              | microsomal glutathione S-transferase 3                                                                                                          |
| 97908_at    | AW120676 | Rmnd5a             | required for meiotic nuclear division 5 homolog A (S. cerevisiae)                                                                               |
| 98478_at    | U95826   | Ccng2              | cyclin G2                                                                                                                                       |
| 97919_at    | AI837467 | Prpf38b            | PRP38 pre-mRNA processing factor 38 (yeast) domain containing B                                                                                 |
| 161644_f_at | AV080704 | Gamt               | guanidinoacetate methyltransferase                                                                                                              |
| 97055_s_at  | AI118194 | Prdx1              | peroxiredoxin 1                                                                                                                                 |
| 160107_at   | K01515   | Hprt1              | hypoxanthine guanine phosphoribosyl transferase 1                                                                                               |
| 99602_at    | AF064088 | Klf10              | Kruppel-like factor 10                                                                                                                          |
| 98509_at    | AI834979 | BC002199           | cDNA sequence BC002199                                                                                                                          |
| 103754_at   | AI847826 | Ube2d3             | ubiquitin-conjugating enzyme E2D 3 (UBC4/5 homolog, yeast)                                                                                      |
| 97509_f_at  | U22324   | Fgfr1              | fibroblast growth factor receptor 1                                                                                                             |
| 102313_at   | L09737   | Gch1               | GTP cyclohydrolase 1                                                                                                                            |
| 93962_at    | AI848598 | ---                | ---                                                                                                                                             |
| 95787_s_at  | X87685   | Scp2               | sterol carrier protein 2, liver                                                                                                                 |
| 102308_at   | AF045582 | Tulp3              | tubby-like protein 3                                                                                                                            |
| 92265_f_at  | AF042139 | Trove2             | TROVE domain family, member 2                                                                                                                   |
| 99500_at    | U13174   | Slc12a2            | solute carrier family 12, member 2                                                                                                              |
| 100514_at   | M63660   | Gna13              | guanine nucleotide binding protein, alpha 13                                                                                                    |
| 160156_at   | AA981015 | 0910001A06Rik      | RIKEN cDNA 0910001A06 gene                                                                                                                      |
| 93980_at    | AW124520 | Rbm13              | RNA binding motif protein 13                                                                                                                    |
| 94464_at    | AF029347 | Clcn3              | chloride channel 3                                                                                                                              |
| 98905_at    | AJ223782 | 37505              | septin 7                                                                                                                                        |
| 96634_at    | AI850090 | 5730469M10Rik      | RIKEN cDNA 5730469M10 gene                                                                                                                      |
| 96603_at    | AW123556 | Qscn6              | quiescin Q6                                                                                                                                     |
| 160195_at   | AI846961 | 1200013P24Rik      | RIKEN cDNA 1200013P24 gene                                                                                                                      |
| 104365_at   | AW046162 | Scamp2             | secretory carrier membrane protein 2                                                                                                            |
| 102268_at   | AW123015 | Rexo1              | REX1, RNA exonuclease 1 homolog (S. cerevisiae)                                                                                                 |
| 94323_at    | AW048132 | Nutf2 /// LOC621   | nuclear transport factor 2 /// similar to Nuclear transport factor 2 (NTF-2) /// similar to Nuclear transport factor 2 (NTF-2) /// similar to N |
| 162399_f_at | AV276058 | Atxn2              | ataxin 2                                                                                                                                        |
| 160294_at   | AI843539 | Snopc2             | small nuclear RNA activating complex, polypeptide 2                                                                                             |
| 98104_at    | AI842889 | Atp6v0b            | ATPase, H+ transporting, lysosomal V0 subunit B                                                                                                 |
| 160503_at   | Z22593   | Fbl                | fibrillarin                                                                                                                                     |
| 98560_at    | AI849152 | Cltb               | clathrin, light polypeptide (Lcb)                                                                                                               |
| 95424_at    | AW120986 | Sumo3              | SMT3 suppressor of mif two 3 homolog 3 (yeast)                                                                                                  |
| 93267_at    | AA688834 | Rnpc2              | RNA-binding region (RNP1, RRM) containing 2                                                                                                     |
| 94953_at    | AW122347 | Racgap1            | Rac GTPase-activating protein 1                                                                                                                 |
| 160496_s_at | AA929330 | LOC671904          | similar to DNA replication licensing factor MCM3 (DNA polymerase alpha holoenzyme-associated protein P1) (P1-MCM3)                              |
| 99599_s_at  | AW210320 | Ptov1              | prostate tumor over expressed gene 1                                                                                                            |
| 160428_at   | AF058956 | Suc1g2             | succinate-Coenzyme A ligase, GDP-forming, beta subunit                                                                                          |
| 92598_at    | AI843029 | Atp6v1b2           | ATPase, H+ transporting, lysosomal V1 subunit B2                                                                                                |
| 93059_at    | AI854841 | 2610204K14Rik      | RIKEN cDNA 2610204K14 gene                                                                                                                      |
| 96677_at    | AI849566 | Setd8              | SET domain containing (lysine methyltransferase) 8                                                                                              |

|             |          |                   |                                                                                                                    |
|-------------|----------|-------------------|--------------------------------------------------------------------------------------------------------------------|
| 160124_r_at | U13839   | Atp6v1c1          | ATPase, H+ transporting, lysosomal V1 subunit C1                                                                   |
| 102870_at   | AW125272 | Gpr178            | G protein-coupled receptor 178                                                                                     |
| 99559_at    | U14390   | Aldh3a2           | aldehyde dehydrogenase family 3, subfamily A2                                                                      |
| 95522_i_at  | AB024005 | Zfp68             | zinc finger protein 68                                                                                             |
| 93093_at    | U35623   | Mcl1              | myeloid cell leukemia sequence 1                                                                                   |
| 96687_f_at  | AI853864 | 2010100O12Rik     | RIKEN cDNA 2010100O12 gene /// similar to CG6878-PA                                                                |
| 162138_s_at | AV343519 | Cbx6              | chromobox homolog 6                                                                                                |
| 96781_at    | AI838293 | Rrn3              | RRN3 RNA polymerase I transcription factor homolog (yeast)                                                         |
| 99464_at    | U22015   | Rxrip110          | retinoid X receptor interacting protein 110                                                                        |
| 103427_at   | AW123223 | Fbxl3             | F-box and leucine-rich repeat protein 3                                                                            |
| 92660_f_at  | X92665   | Ube2e1            | ubiquitin-conjugating enzyme E2E 1, UBC4/5 homolog (yeast)                                                         |
| 97311_at    | AI836509 | 6720456B07Rik     | RIKEN cDNA 6720456B07 gene                                                                                         |
| 98908_at    | AW125510 | Spp13             | signal peptide peptidase 3                                                                                         |
| 96270_at    | AI847092 | D11Bwg0434e       | DNA segment, Chr 11, Brigham & Women's Genetics 0434 expressed                                                     |
| 94407_at    | AI835481 | B3gat3            | beta-1,3-glucuronyltransferase 3 (glucuronosyltransferase I)                                                       |
| 161499_f_at | AV100072 | ---               | ---                                                                                                                |
| 93789_s_at  | AF038848 | Sin3b             | transcriptional regulator, SIN3B (yeast)                                                                           |
| 95112_f_at  | AW122632 | Ppil2             | peptidylprolyl isomerase (cyclophilin)-like 2                                                                      |
| 95124_i_at  | AW122337 | Rbx1              | ring-box 1                                                                                                         |
| 96115_at    | U28168   | Reep5             | receptor accessory protein 5                                                                                       |
| 101543_f_at | M13441   | Tuba6             | tubulin, alpha 6                                                                                                   |
| 92754_at    | D49920   | Fdxr              | ferredoxin reductase                                                                                               |
| 92294_at    | AW060793 | Arl5a             | ADP-ribosylation factor-like 5A                                                                                    |
| 103411_at   | AI835098 | Gna11             | guanine nucleotide binding protein, alpha 11                                                                       |
| 101421_at   | AF030001 | Rnf5              | ring finger protein 5                                                                                              |
| 104279_at   | AW125116 | Polr2f            | polymerase (RNA) II (DNA directed) polypeptide F                                                                   |
| 93118_at    | AI844131 | Hnrpa2b1          | heterogeneous nuclear ribonucleoprotein A2/B1                                                                      |
| 98759_f_at  | M28727   | Tuba1 /// Tuba2   | tubulin, alpha 1 /// tubulin, alpha 2 /// tubulin, alpha 6                                                         |
| 95149_at    | AW121088 | Copz1             | coatamer protein complex, subunit zeta 1                                                                           |
| 161360_at   | AV212241 | Oaz1              | ornithine decarboxylase antizyme                                                                                   |
| 96840_at    | AI851243 | Gabarapl2         | gamma-aminobutyric acid (GABA-A) receptor-associated protein-like 2                                                |
| 94814_at    | AI957190 | Gnai3             | guanine nucleotide binding protein, alpha inhibiting 3                                                             |
| 99164_at    | AI844560 | Mapbpip           | mitogen activated protein binding protein interacting protein                                                      |
| 160696_at   | U00689   | Tia1              | cytotoxic granule-associated RNA binding protein 1                                                                 |
| 99570_s_at  | AF029982 | Atp2a2            | ATPase, Ca++ transporting, cardiac muscle, slow twitch 2                                                           |
| 103078_at   | AA881018 | Tmem150           | transmembrane protein 150                                                                                          |
| 103660_at   | AF093669 | Pex11a            | peroxisomal biogenesis factor 11a                                                                                  |
| 97366_at    | AI851024 | Lemd2             | LEM domain containing 2                                                                                            |
| 98545_at    | X78683   | Phb2              | prohibitin 2                                                                                                       |
| 98761_i_at  | L20450   | Zfp97 /// BC01811 | zinc finger protein 97 /// cDNA sequence BC018101                                                                  |
| 94250_at    | U14172   | Eif3s10           | eukaryotic translation initiation factor 3, subunit 10 (theta)                                                     |
| 96056_at    | X80638   | Rhoc              | ras homolog gene family, member C                                                                                  |
| 101486_at   | Y10875   | Psmb10            | proteasome (prosome, macropain) subunit, beta type 10                                                              |
| 160347_at   | AW125168 | D15Ert4785e       | DNA segment, Chr 15, ERATO Doi 785, expressed                                                                      |
| 96019_at    | AI843476 | Sypl              | synaptophysin-like protein                                                                                         |
| 103350_at   | M64641   | Psmd7             | proteasome (prosome, macropain) 26S subunit, non-ATPase, 7                                                         |
| 97304_at    | AI836100 | Ubp1              | upstream binding protein 1                                                                                         |
| 95712_at    | AW045261 | Orc6l             | origin recognition complex, subunit 6-like (S. cerevisiae)                                                         |
| 160277_at   | AW125618 | Stx12             | syntaxin 12                                                                                                        |
| 96686_i_at  | AI853864 | 2010100O12Rik     | RIKEN cDNA 2010100O12 gene                                                                                         |
| 101971_at   | AW061255 | 2500002L14Rik     | RIKEN cDNA 2500002L14 gene                                                                                         |
| 160264_s_at | AI836143 | Pcp4l1            | Purkinje cell protein 4-like 1                                                                                     |
| 93347_at    | Z22819   | Rab24             | RAB24, member RAS oncogene family                                                                                  |
| 101104_at   | AB001990 | Dscr3             | Down syndrome critical region gene 3                                                                               |
| 101664_at   | Z83368   | Rps3a             | ribosomal protein S3a                                                                                              |
| 95458_s_at  | AW121960 | Impad1            | inositol monophosphatase domain containing 1                                                                       |
| 160082_s_at | D87901   | Arf4              | ADP-ribosylation factor 4                                                                                          |
| 101072_at   | AW124250 | Eif4ebp2          | eukaryotic translation initiation factor 4E binding protein 2                                                      |
| 98631_g_at  | AW106745 | Nsdhl             | NAD(P) dependent steroid dehydrogenase-like                                                                        |
| 104320_at   | AI841777 | Pdxk              | pyridoxal (pyridoxine, vitamin B6) kinase                                                                          |
| 92664_at    | AW050270 | 2500002G23Rik     | RIKEN cDNA 2500002G23 gene                                                                                         |
| 95699_f_at  | AI848094 | Dnajc8 /// LOC66  | DnaJ (Hsp40) homolog, subfamily C, member 8 /// similar to DnaJ (Hsp40) homolog, subfamily C, member 8 (predicted) |
| 94255_g_at  | AI845237 | Clic4             | chloride intracellular channel 4 (mitochondrial)                                                                   |
| 94548_at    | AI790537 | Mfsd1             | major facilitator superfamily domain containing 1                                                                  |
| 98049_at    | AI853458 | 1300018I05Rik     | RIKEN cDNA 1300018I05 gene                                                                                         |
| 95733_at    | AI838274 | Slc29a1           | solute carrier family 29 (nucleoside transporters), member 1                                                       |

|             |          |                  |                                                                                                                                               |
|-------------|----------|------------------|-----------------------------------------------------------------------------------------------------------------------------------------------|
| 103924_at   | AW048884 | Agpat5           | 1-acylglycerol-3-phosphate O-acyltransferase 5 (lysophosphatidic acid acyltransferase, epsilon)                                               |
| 100734_at   | Y00225   | Rpl3             | ribosomal protein L3                                                                                                                          |
| 100608_at   | X95641   | Sptlc1           | serine palmitoyltransferase, long chain base subunit 1                                                                                        |
| 101056_at   | X60672   | Rdx              | radixin                                                                                                                                       |
| 102476_f_at | AW121303 | Xpo7             | Exportin 7                                                                                                                                    |
| 104189_at   | AI122079 | Traf6            | Tnf receptor-associated factor 6                                                                                                              |
| 99340_at    | D29802   | Gnb211           | guanine nucleotide binding protein (G protein), beta polypeptide 2 like 1                                                                     |
| 97395_at    | AW122465 | Prpf19           | PRP19/PSO4 pre-mRNA processing factor 19 homolog (S. cerevisiae)                                                                              |
| 96806_at    | AI843802 | Lpin2            | lipin 2                                                                                                                                       |
| 160942_at   | AI843876 | Cbx6             | chromobox homolog 6                                                                                                                           |
| 95406_at    | AW125347 | 1810037I17Rik    | RIKEN cDNA 1810037I17 gene                                                                                                                    |
| 94923_f_at  | AA543502 | Otud4            | OTU domain containing 4                                                                                                                       |
| 98540_g_at  | AF071312 | Cops2            | COP9 (constitutive photomorphogenic) homolog, subunit 2 (Arabidopsis thaliana)                                                                |
| 103006_at   | AB012276 | Atf5             | activating transcription factor 5                                                                                                             |
| 96117_r_at  | AI843732 | H13              | histocompatibility 13                                                                                                                         |
| 92882_at    | Y00094   | Rab1             | RAB1, member RAS oncogene family                                                                                                              |
| 94488_at    | AI847041 | 1110059P08Rik    | RIKEN cDNA 1110059P08 gene                                                                                                                    |
| 95059_at    | AW047399 | Pnrc2            | proline-rich nuclear receptor coactivator 2                                                                                                   |
| 93011_at    | AW123904 | Gabarapl1        | gamma-aminobutyric acid (GABA(A)) receptor-associated protein-like 1                                                                          |
| 160333_at   | AI846102 | 1110008F13Rik    | RIKEN cDNA 1110008F13 gene                                                                                                                    |
| 99054_at    | D16141   | Llg1             | lethal giant larvae homolog 1 (Drosophila)                                                                                                    |
| 99052_at    | D76432   | Zfx1a            | zinc finger homeobox 1a                                                                                                                       |
| 93836_at    | AF041054 | Bnip3            | BCL2/adenovirus E1B interacting protein 1, NIP3                                                                                               |
| 104614_at   | AI852765 | Gpc1             | glypican 1                                                                                                                                    |
| 95146_at    | AI839280 | Tmem66           | transmembrane protein 66                                                                                                                      |
| 160857_at   | U30244   | Efnb2            | ephrin B2                                                                                                                                     |
| 93580_at    | AI837010 | Pum2             | pumilio 2 (Drosophila)                                                                                                                        |
| 94290_at    | AW124346 | Akt1s1           | AKT1 substrate 1 (proline-rich)                                                                                                               |
| 100565_at   | AW123396 | Gnpda1 /// LOC2  | glucosamine-6-phosphate deaminase 1 /// similar to Glucosamine-6-phosphate isomerase (Glucosamine-6-phosphate deaminase) (C                   |
| 101082_at   | J02652   | LOC677317        | similar to NADP-dependent malic enzyme (NADP-ME) (Malic enzyme 1)                                                                             |
| 94041_at    | AI840643 | Hnrpk            | heterogeneous nuclear ribonucleoprotein K                                                                                                     |
| 96915_f_at  | AA879764 | Ndufa3           | NADH dehydrogenase (ubiquinone) 1 alpha subcomplex, 3                                                                                         |
| 96320_at    | AW121862 | 2310044H10Rik    | RIKEN cDNA 2310044H10 gene                                                                                                                    |
| 104163_at   | AA711002 | Ipo8             | importin 8                                                                                                                                    |
| 103839_at   | AF068748 | Sphk1            | sphingosine kinase 1                                                                                                                          |
| 93440_at    | AA692530 | Sec22b           | SEC22 vesicle trafficking protein homolog B (S. cerevisiae)                                                                                   |
| 160676_at   | AI839212 | 1810012N18Rik    | RIKEN cDNA 1810012N18 gene                                                                                                                    |
| 93754_at    | AF030343 | Ech1             | enoyl coenzyme A hydratase 1, peroxisomal                                                                                                     |
| 97292_at    | AI845225 | ---              | ---                                                                                                                                           |
| 95409_at    | AW047671 | 1110019J04Rik    | RIKEN cDNA 1110019J04 gene                                                                                                                    |
| 98516_at    | AI853136 | BC056474         | cDNA sequence BC056474                                                                                                                        |
| 94801_at    | AI607332 | Pgrmc2           | progesterone receptor membrane component 2                                                                                                    |
| 103708_at   | AI132207 | Eif1a            | eukaryotic translation initiation factor 1A                                                                                                   |
| 101039_at   | X04647   | Col4a2           | procollagen, type IV, alpha 2                                                                                                                 |
| 101514_at   | AF041433 | Trappc3          | trafficking protein particle complex 3                                                                                                        |
| 160278_at   | AI854550 | 2810428I15Rik    | RIKEN cDNA 2810428I15 gene                                                                                                                    |
| 103370_at   | AI848367 | Lin7c            | lin-7 homolog C (C. elegans)                                                                                                                  |
| 104367_at   | AW124983 | ---              | ---                                                                                                                                           |
| 102807_at   | AW048054 | Prune            | prune homolog (Drosophila)                                                                                                                    |
| 96342_at    | AI846320 | Hspc171          | HSPC171 protein                                                                                                                               |
| 93337_at    | U10119   | Vps4b            | vacuolar protein sorting 4b (yeast)                                                                                                           |
| 94229_at    | AW124489 | Tsc22d4          | TSC22 domain family 4                                                                                                                         |
| 103423_at   | AI846517 | Cyb561           | cytochrome b-561                                                                                                                              |
| 93256_at    | AI853728 | Golga7 /// LOC62 | golgi autoantigen, golgin subfamily a, 7 /// similar to golgi autoantigen, golgin subfamily a, 7                                              |
| 162177_f_at | AV365838 | Rpl3 /// LOC2428 | ribosomal protein L3 /// similar to 60S ribosomal protein L3 (J1 protein) /// similar to 60S ribosomal protein L3 (L4) /// similar to 60S rit |
| 100952_at   | U47323   | Stim1            | stromal interaction molecule 1                                                                                                                |
| 101086_f_at | X63866   | Cnbp1            | cellular nucleic acid binding protein 1                                                                                                       |
| 99575_at    | AA517835 | Ubqln1           | ubiquilin 1                                                                                                                                   |
| 92542_at    | AI849035 | D4Wsu53e         | DNA segment, Chr 4, Wayne State University 53, expressed                                                                                      |
| 100561_at   | AW209098 | Iqgap1           | IQ motif containing GTPase activating protein 1                                                                                               |
| 95102_at    | AW123754 | Scotin           | scotin gene                                                                                                                                   |
| 161786_f_at | AV363187 | ---              | ---                                                                                                                                           |
| 96243_f_at  | AW120804 | Aldh9a1          | aldehyde dehydrogenase 9, subfamily A1                                                                                                        |
| 99546_at    | M77831   | Fkbp2            | FK506 binding protein 2                                                                                                                       |
| 161014_at   | AI595912 | ---              | ---                                                                                                                                           |
| 102375_at   | AI843738 | Smyd5            | SET and MYND domain containing 5                                                                                                              |

|             |          |                  |                                                                                                                                            |
|-------------|----------|------------------|--------------------------------------------------------------------------------------------------------------------------------------------|
| 103555_at   | AI843520 | Chmp4b           | chromatin modifying protein 4B                                                                                                             |
| 104141_at   | AI850401 | D15Wsu75e        | DNA segment, Chr 15, Wayne State University 75, expressed                                                                                  |
| 97647_at    | M11408   | Rps16            | ribosomal protein S16                                                                                                                      |
| 100560_at   | U95116   | Pafah1b1         | platelet-activating factor acetylhydrolase, isoform 1b, beta1 subunit                                                                      |
| 96061_at    | AW060186 | Usp14            | ubiquitin specific peptidase 14                                                                                                            |
| 92310_at    | M96163   | Plk2             | polo-like kinase 2 (Drosophila)                                                                                                            |
| 102217_at   | AI639925 | Gprk5            | G protein-coupled receptor kinase 5                                                                                                        |
| 103990_at   | X14897   | Fosb             | FBJ osteosarcoma oncogene B                                                                                                                |
| 92771_at    | AB013357 | Zfp207           | zinc finger protein 207                                                                                                                    |
| 93981_at    | J03520   | Plat             | plasminogen activator, tissue                                                                                                              |
| 95446_at    | AW120502 | 6330577E15Rik    | RIKEN cDNA 6330577E15 gene                                                                                                                 |
| 96252_at    | AJ005073 | Pdcd6ip          | programmed cell death 6 interacting protein                                                                                                |
| 103401_at   | L11163   | Acads            | acyl-Coenzyme A dehydrogenase, short chain                                                                                                 |
| 103812_at   | AF047838 | Clca1            | chloride channel calcium activated 1                                                                                                       |
| 93042_at    | D21207   | Bzrp             | benzodiazepine receptor, peripheral                                                                                                        |
| 100486_at   | U60453   | Ezh1             | enhancer of zeste homolog 1 (Drosophila)                                                                                                   |
| 94840_at    | U05837   | Hexa             | hexosaminidase A                                                                                                                           |
| 104201_at   | AA718649 | Plac1            | placental specific protein 1                                                                                                               |
| 96834_at    | AI843586 | Sfrs9            | splicing factor, arginine/serine rich 9                                                                                                    |
| 92573_at    | AB021743 | Ppp2r1a          | protein phosphatase 2 (formerly 2A), regulatory subunit A (PR 65), alpha isoform                                                           |
| 97818_at    | AI838691 | Snx4             | sorting nexin 4                                                                                                                            |
| 93535_at    | AF041472 | Atxn2            | ataxin 2                                                                                                                                   |
| 96204_at    | AJ239082 | Sh3bgr           | SH3-binding domain glutamic acid-rich protein                                                                                              |
| 92872_at    | AI837715 | Necap1           | NECAP endocytosis associated 1                                                                                                             |
| 101482_at   | D85137   | Ppp1cc           | protein phosphatase 1, catalytic subunit, gamma isoform                                                                                    |
| 160138_at   | L38822   | Mxi1             | Max interacting protein 1                                                                                                                  |
| 160783_at   | AW123154 | D14Erd436e       | DNA segment, Chr 14, ERATO Doi 436, expressed                                                                                              |
| 93214_at    | AF059029 | Camk2d           | calcium/calmodulin-dependent protein kinase II, delta                                                                                      |
| 94913_at    | U65313   | E430034L04Rik    | RIKEN cDNA E430034L04 gene                                                                                                                 |
| 162133_at   | AV342910 | Sema4b           | sema domain, immunoglobulin domain (Ig), transmembrane domain (TM) and short cytoplasmic domain, (semaphorin) 4B                           |
| 97279_at    | AI837615 | Hibadh           | 3-hydroxyisobutyrate dehydrogenase                                                                                                         |
| 99532_at    | D78382   | Tob1             | transducer of ErbB-2.1                                                                                                                     |
| 93757_at    | AI843574 | Spr              | signal recognition particle receptor ('docking protein')                                                                                   |
| 95650_at    | U95114   | Nhp211 /// LOC43 | NHP2 non-histone chromosome protein 2-like 1 (S. cerevisiae) /// similar to Nhp2 non-histone chromosome protein 2-like 1 /// similar       |
| 93810_at    | X68378   | Ctsd             | cathepsin D                                                                                                                                |
| 96561_at    | AI157475 | Nfat2ip          | nuclear factor of activated T-cells, cytoplasmic, calcineurin-dependent 2 interacting protein                                              |
| 104408_s_at | L35032   | Sox18            | SRY-box containing gene 18                                                                                                                 |
| 104413_at   | AI834976 | Slc35d1          | solute carrier family 35 (UDP-glucuronic acid/UDP-N-acetylgalactosamine dual transporter), member D1                                       |
| 96762_at    | AW046160 | Tnpo1            | transportin 1                                                                                                                              |
| 161074_at   | AW107428 | Pcyt1a           | phosphate cytidyltransferase 1, choline, alpha isoform                                                                                     |
| 96876_at    | U34259   | Laptn4a          | lysosomal-associated protein transmembrane 4A                                                                                              |
| 104331_at   | AA832935 | Arid1a /// LOC66 | AT rich interactive domain 1A (Swi1 like) /// similar to AT rich interactive domain 1A isoform a /// similar to AT rich interactive domain |
| 96079_at    | AI853881 | 0610010K06Rik    | RIKEN cDNA 0610010K06 gene                                                                                                                 |
| 101073_at   | X67469   | Lrp1             | low density lipoprotein receptor-related protein 1                                                                                         |
| 160183_f_at | AI846109 | Tmed7            | transmembrane emp24 protein transport domain containing 7                                                                                  |
| 95526_at    | AI606243 | Xpo7             | exportin 7                                                                                                                                 |
| 96130_at    | AA822531 | Slk              | STE20-like kinase (yeast)                                                                                                                  |
| 97471_at    | AI848442 | Armc1            | armadillo repeat containing 1                                                                                                              |
| 95889_at    | AI854770 | Arf3             | ADP-ribosylation factor 3                                                                                                                  |
| 96890_at    | AW060971 | 1300002A08Rik    | RIKEN cDNA 1300002A08 gene                                                                                                                 |
| 160549_at   | M23568   | Tpar1            | TPA regulated locus                                                                                                                        |
| 97821_at    | AI646056 | Pak2             | p21 (CDKN1A)-activated kinase 2                                                                                                            |
| 94113_at    | AA163908 | 4933415E08Rik    | RIKEN cDNA 4933415E08 gene                                                                                                                 |
| 100323_at   | Z23077   | Amd1 /// Amd2    | S-adenosylmethionine decarboxylase 1 /// S-adenosylmethionine decarboxylase 2                                                              |
| 100599_at   | M94087   | Atf4             | activating transcription factor 4                                                                                                          |
| 101369_at   | AI391071 | Zfp213           | zinc finger protein 213                                                                                                                    |
| 160318_at   | AI844511 | Stub1            | STIP1 homology and U-Box containing protein 1                                                                                              |
| 93732_f_at  | AF104358 | Gipc1            | GIPC PDZ domain containing family, member 1                                                                                                |
| 92975_at    | L14543   | Sh3bp2           | SH3-domain binding protein 2                                                                                                               |
| 93841_at    | AW060249 | Eif2a            | eukaryotic translation initiation factor 2a                                                                                                |
| 94489_at    | U84411   | Ptp4a1 /// LOC43 | protein tyrosine phosphatase 4a1 /// protein tyrosine phosphatase 4a1-like /// protein tyrosine phosphatase 4a1 pseudogene /// prote       |
| 99099_at    | U08378   | Stat3            | signal transducer and activator of transcription 3                                                                                         |
| 94966_at    | Z11911   | G6pdx            | glucose-6-phosphate dehydrogenase X-linked                                                                                                 |
| 99505_at    | AI844664 | Rab4b            | RAB4B, member RAS oncogene family                                                                                                          |
| 93498_s_at  | M97216   | Aplp2            | amyloid beta (A4) precursor-like protein 2                                                                                                 |
| 97526_at    | AW123294 | Ap3m1            | adaptor-related protein complex 3, mu 1 subunit                                                                                            |

|             |          |                   |                                                                                                                                                                          |
|-------------|----------|-------------------|--------------------------------------------------------------------------------------------------------------------------------------------------------------------------|
| 160261_i_at | AI849416 | Lats2             | large tumor suppressor 2                                                                                                                                                 |
| 93986_at    | AA939576 | 2410003A14Rik     | RIKEN cDNA 2410003A14 gene                                                                                                                                               |
| 104325_at   | AI461631 | Mrap              | melanocortin 2 receptor accessory protein                                                                                                                                |
| 103619_at   | AI850017 | Cyb5b             | cytochrome b5 type B                                                                                                                                                     |
| 93144_at    | AI854602 | AI317237          | expressed sequence AI317237                                                                                                                                              |
| 94554_at    | AW120965 | Trappc5           | trafficking protein particle complex 5                                                                                                                                   |
| 96360_at    | AW125498 | Arhgdia           | Rho GDP dissociation inhibitor (GDI) alpha                                                                                                                               |
| 101540_at   | AF069519 | Tdg /// LOC5451   | thymine DNA glycosylase /// similar to thymine DNA glycosylase isoform 2 /// similar to G/T mismatch-specific thymine DNA glycosylase                                    |
| 97259_at    | AJ005983 | Arpp19            | cAMP-regulated phosphoprotein 19                                                                                                                                         |
| 103959_at   | AI605405 | Phf13             | PHD finger protein 13                                                                                                                                                    |
| 101502_at   | X89749   | Tgif              | TG interacting factor                                                                                                                                                    |
| 100701_r_at | AB000490 | Nr5a1             | nuclear receptor subfamily 5, group A, member 1                                                                                                                          |
| 94059_at    | AI852524 | Nrbp              | nuclear receptor binding protein                                                                                                                                         |
| 104058_at   | AW047528 | 1110018J12Rik     | RIKEN cDNA 1110018J12 gene                                                                                                                                               |
| 160272_at   | AI849356 | Cbx3 /// LOC629   | chromobox homolog 3 (Drosophila HP1 gamma) /// similar to chromobox homolog 3 /// similar to chromobox homolog 3 /// similar to chromobox homolog 3                      |
| 97370_at    | AI552922 | Spryd4            | SPRY domain containing 4                                                                                                                                                 |
| 99148_at    | AI852862 | Fh1               | fumarate hydratase 1                                                                                                                                                     |
| 96010_at    | AW047023 | Kpna3             | karyopherin (importin) alpha 3                                                                                                                                           |
| 93835_at    | AI843222 | Fuca1             | fucosidase, alpha-L-1, tissue                                                                                                                                            |
| 97479_at    | AJ130961 | Ube2l3            | ubiquitin-conjugating enzyme E2L 3                                                                                                                                       |
| 100534_at   | AI183109 | Tsnax             | translin-associated factor X                                                                                                                                             |
| 103406_at   | AI853967 | Xab1              | XPA binding protein 1                                                                                                                                                    |
| 100056_at   | X54352   | Fbxw2             | F-box and WD-40 domain protein 2                                                                                                                                         |
| 98927_at    | AI851048 | Rab6              | RAB6, member RAS oncogene family                                                                                                                                         |
| 99580_s_at  | U16818   | Ugt1a2 /// Ugt1a1 | UDP glucuronosyltransferase 1 family, polypeptide A2 /// UDP glucuronosyltransferase 1 family, polypeptide A6A /// UDP glucuronosyltransferase 1 family, polypeptide A6A |
| 102200_at   | AF018952 | Aqp8              | aquaporin 8                                                                                                                                                              |
| 93529_at    | AW125219 | Iltf1             | integrin alpha FG-GAP repeat containing 1                                                                                                                                |
| 92817_at    | AW120646 | Imp3              | IMP3, U3 small nucleolar ribonucleoprotein, homolog (yeast)                                                                                                              |
| 102988_at   | U92477   | Inpp1             | inositol polyphosphate phosphatase-like 1                                                                                                                                |
| 92397_at    | AW123016 | Centg2            | centaurin, gamma 2                                                                                                                                                       |
| 93276_at    | U90123   | Hn1               | hematological and neurological expressed sequence 1                                                                                                                      |
| 97897_at    | AI848435 | C78339            | expressed sequence C78339                                                                                                                                                |
| 99510_at    | X59274   | Prkcb1            | protein kinase C, beta 1                                                                                                                                                 |
| 94532_at    | U13841   | Atp6v1e1          | VATPase, H+ transporting, lysosomal V1 subunit E1                                                                                                                        |
| 100976_at   | AF013490 | Ptpn9             | protein tyrosine phosphatase, non-receptor type 9                                                                                                                        |
| 92603_at    | U13840   | Atp6v0d1          | ATPase, H+ transporting, lysosomal V0 subunit D1                                                                                                                         |
| 102776_at   | AI155095 | Usp38             | ubiquitin specific peptidase 38                                                                                                                                          |
| 101184_at   | U66827   | Hsd17b3           | hydroxysteroid (17-beta) dehydrogenase 3                                                                                                                                 |
| 94081_at    | AW124390 | Rbm17             | RNA binding motif protein 17                                                                                                                                             |
| 103097_at   | AI844487 | 0610038F07Rik     | RIKEN cDNA 0610038F07 gene                                                                                                                                               |
| 98415_at    | AF046060 | Crlf3             | cytokine receptor-like factor 3                                                                                                                                          |
| 160457_at   | AW125397 | Mrfap1            | Morf4 family associated protein 1                                                                                                                                        |
| 92887_at    | AF004106 | Ddah2             | dimethylarginine dimethylaminohydrolase 2                                                                                                                                |
| 99196_at    | AI848532 | Pcnp              | PEST proteolytic signal containing nuclear protein                                                                                                                       |
| 94929_at    | M97590   | Ptpn1             | protein tyrosine phosphatase, non-receptor type 1                                                                                                                        |
| 98933_at    | AI849218 | Mark3             | MAP/microtubule affinity-regulating kinase 3                                                                                                                             |
| 99471_at    | AF158183 | Stard7            | START domain containing 7                                                                                                                                                |
| 100464_at   | AI840585 | 3110043O21Rik     | RIKEN cDNA 3110043O21 gene                                                                                                                                               |
| 95415_f_at  | AI132585 | C1r               | complement component 1, r subcomponent                                                                                                                                   |
| 94903_at    | AI850801 | Tmed7             | transmembrane emp24 protein transport domain containing 7                                                                                                                |
| 92527_at    | Z50190   | Adcy9             | adenylate cyclase 9                                                                                                                                                      |
| 98982_at    | AW046443 | Tmpo              | thymopoietin                                                                                                                                                             |
| 96093_at    | AI842705 | 0610007P14Rik     | RIKEN cDNA 0610007P14 gene                                                                                                                                               |
| 102035_at   | AF037044 | Tpmt              | thiopurine methyltransferase                                                                                                                                             |
| 161104_at   | AI846811 | 37508             | septin 10                                                                                                                                                                |
| 99345_at    | AI644767 | Mphosph9          | M-phase phosphoprotein 9                                                                                                                                                 |
| 100684_at   | U92794   | Prkcsh            | protein kinase C substrate 80K-H                                                                                                                                         |
| 101962_at   | AI854884 | Ddx17             | DEAD (Asp-Glu-Ala-Asp) box polypeptide 17                                                                                                                                |
| 104389_at   | AW049360 | 1700017B05Rik     | RIKEN cDNA 1700017B05 gene /// hypothetical protein LOC640563                                                                                                            |
| 99068_at    | X80169   | Anapc1            | anaphase promoting complex subunit 1                                                                                                                                     |
| 101088_f_at | U20326   | Cnbp1             | cellular nucleic acid binding protein 1                                                                                                                                  |
| 101665_at   | C85959   | Nr5a1             | nuclear receptor subfamily 5, group A, member 1                                                                                                                          |
| 160162_at   | AI852545 | Tagln2            | transgelin 2                                                                                                                                                             |
| 92986_g_at  | D83203   | Ptpnj /// AW1257  | protein tyrosine phosphatase, receptor type, J /// expressed sequence AW125753                                                                                           |
| 94889_at    | AW121235 | Vapa              | vesicle-associated membrane protein, associated protein A                                                                                                                |
| 95470_at    | AI846025 | Pak1ip1           | PAK1 interacting protein 1                                                                                                                                               |

|             |          |                 |                                                                                                                             |
|-------------|----------|-----------------|-----------------------------------------------------------------------------------------------------------------------------|
| 101498_at   | AF042730 | Impa1           | inositol (myo)-1(or 4)-monophosphatase 1                                                                                    |
| 104015_at   | AW047992 | Metap1          | methionyl aminopeptidase 1                                                                                                  |
| 160192_at   | AF031568 | Rbmxrt          | RNA binding motif protein, X chromosome retogene                                                                            |
| 160366_at   | AI846422 | BC031181        | cDNA sequence BC031181                                                                                                      |
| 94457_at    | AW049735 | AL033326        | expressed sequence AL033326                                                                                                 |
| 160283_at   | AW045742 | Rsl1d1          | ribosomal L1 domain containing 1                                                                                            |
| 100622_at   | AF093857 | Prdx6           | peroxiredoxin 6                                                                                                             |
| 103863_at   | AW049769 | 5630401J11Rik   | RIKEN cDNA 5630401J11 gene                                                                                                  |
| 96098_at    | AI848416 | Mrpl36          | mitochondrial ribosomal protein L36                                                                                         |
| 98561_at    | AJ242874 | Tnni1           | troponin I, skeletal, slow 1                                                                                                |
| 97237_at    | AI837771 | 1810003N24Rik   | RIKEN cDNA 1810003N24 gene                                                                                                  |
| 96066_s_at  | X97047   | Pkm2            | pyruvate kinase, muscle                                                                                                     |
| 96018_r_at  | AI853561 | Zdhhc5          | zinc finger, DHH domain containing 5                                                                                        |
| 160376_at   | AW125508 | Trp53inp2       | tumor protein p53 inducible nuclear protein 2                                                                               |
| 97448_at    | AI845165 | 4933439C20Rik   | RIKEN cDNA 4933439C20 gene /// phosphatidylserine decarboxylase                                                             |
| 94067_at    | AW212399 | Dcps            | decapping enzyme, scavenger                                                                                                 |
| 99142_at    | AI834895 | Paqr7           | progesterone and adiponectin receptor family member VII                                                                     |
| 160303_at   | AI846542 | Acad9           | acyl-Coenzyme A dehydrogenase family, member 9                                                                              |
| 93815_at    | AI839425 | Chchd3          | coiled-coil-helix-coiled-coil-helix domain containing 3                                                                     |
| 160301_at   | AI848114 | Riok3           | RIO kinase 3 (yeast)                                                                                                        |
| 100540_at   | M63848   | Lta4h           | leukotriene A4 hydrolase                                                                                                    |
| 100986_at   | AF055889 | Fhl2            | four and a half LIM domains 2                                                                                               |
| 101085_at   | AI854257 | Mrps24          | mitochondrial ribosomal protein S24                                                                                         |
| 101023_f_at | AI843605 | 0610010E21Rik   | RIKEN cDNA 0610010E21 gene                                                                                                  |
| 92211_at    | AF013969 | AF013969 /// LO | expressed sequence AF013969 /// similar to CG5514-PB, isoform B /// region containing expressed sequence AF013969; RIKEN cD |
| 95411_at    | AB025407 | 1110004F10Rik   | RIKEN cDNA 1110004F10 gene                                                                                                  |
| 96919_at    | M64298   | Atp6v0c         | ATPase, H+ transporting, lysosomal V0 subunit C                                                                             |
| 101483_at   | AI850862 | Ccndbp1         | cyclin D-type binding-protein 1                                                                                             |
| 100016_at   | Z12604   | Mmp11           | matrix metalloproteinase 11                                                                                                 |
| 102965_at   | AW121646 | AI481105        | expressed sequence AI481105                                                                                                 |
| 160384_at   | AF118128 | Bat1a           | HLA-B-associated transcript 1A                                                                                              |
| 100893_at   | U27455   | Sptlc2          | serine palmitoyltransferase, long chain base subunit 2                                                                      |
| 92855_at    | Z50159   | Eif1            | eukaryotic translation initiation factor 1                                                                                  |
| 160529_r_at | U30838   | Vdac2           | voltage-dependent anion channel 2                                                                                           |
| 160820_at   | AW061299 | Igsf8           | immunoglobulin superfamily, member 8                                                                                        |
| 92518_at    | Y09535   | Neo1            | neogenin                                                                                                                    |
| 92795_at    | M72414   | Mtap4           | microtubule-associated protein 4                                                                                            |
| 92407_at    | AJ012072 | Myom1           | myomesin 1                                                                                                                  |
| 162426_f_at | AV292472 | Scamp1          | secretory carrier membrane protein 1                                                                                        |
| 96299_at    | AI847298 | ---             | Transcribed locus, strongly similar to XP_580165.1 PREDICTED: hypothetical protein XP_580165 [Rattus norvegicus]            |
| 95593_at    | AW125446 | Golph2          | golgi phosphoprotein 2                                                                                                      |
| 94995_at    | AI854331 | A030007L17Rik   | RIKEN cDNA A030007L17 gene                                                                                                  |
| 94017_s_at  | X98511   | Sfrs2           | splicing factor, arginine/serine-rich 2 (SC-35)                                                                             |
| 99184_at    | AW120896 | Csad            | cysteine sulfinic acid decarboxylase                                                                                        |
| 103567_at   | AW123810 | Fryl            | furry homolog-like (Drosophila)                                                                                             |
| 93085_at    | D44456   | Psmb9           | proteasome (prosome, macropain) subunit, beta type 9 (large multifunctional peptidase 2)                                    |
| 97312_at    | AB014464 | Cd164           | CD164 antigen                                                                                                               |
| 97497_at    | Z11886   | Notch1          | Notch gene homolog 1 (Drosophila)                                                                                           |
| 94267_i_at  | AW124386 | Ubl5            | ubiquitin-like 5                                                                                                            |
| 95142_s_at  | U10407   | Capzb           | capping protein (actin filament) muscle Z-line, beta                                                                        |
| 98369_f_at  | AW048053 | 2610028J07Rik   | RIKEN cDNA 2610028J07 gene                                                                                                  |
| 97823_g_at  | AW122689 | Pak2            | p21 (CDKN1A)-activated kinase 2                                                                                             |
| 100046_at   | J04627   | Mthfd2          | methylenetetrahydrofolate dehydrogenase (NAD+ dependent), methylenetetrahydrofolate cyclohydrolase                          |
| 93627_at    | AI852287 | Ankrd28         | ankyrin repeat domain 28                                                                                                    |
| 94454_at    | AF085348 | Dazap2          | DAZ associated protein 2                                                                                                    |
| 101061_at   | AI845293 | Ssr2            | signal sequence receptor, beta                                                                                              |
| 94254_at    | AI845237 | Clic4           | chloride intracellular channel 4 (mitochondrial)                                                                            |
| 97406_at    | AW122258 | Cbfa2t2h        | core-binding factor, runt domain, alpha subunit 2, translocated to, 2 homolog (human)                                       |
| 102387_at   | AA799042 | LOC670726       | similar to ribosomal protein L24-like                                                                                       |
| 95894_at    | AW125034 | Fancm           | Fanconi anemia, complementation group M                                                                                     |
| 92799_g_at  | AA870675 | Atp5c1          | ATP synthase, H+ transporting, mitochondrial F1 complex, gamma polypeptide 1                                                |
| 94008_at    | AW045358 | Tceb1           | transcription elongation factor B (SIII), polypeptide 1                                                                     |
| 104717_at   | AI848330 | Zfp644          | zinc finger protein 644                                                                                                     |
| 104071_at   | AI852433 | Tnpo2           | transportin 2 (importin 3, karyopherin beta 2b)                                                                             |
| 98330_at    | D70849   | Zic3            | zinc finger protein of the cerebellum 3                                                                                     |
| 160593_at   | AW120567 | Snx9            | sorting nexin 9                                                                                                             |

|             |          |                  |                                                                                                                             |
|-------------|----------|------------------|-----------------------------------------------------------------------------------------------------------------------------|
| 92800_i_at  | AI836694 | Atp5c1 /// D13Mg | ATP synthase, H+ transporting, mitochondrial F1 complex, gamma polypeptide 1 /// DNA Segment, Chr 13, Mouse Genome Informat |
| 93077_s_at  | D86232   | Ly6c             | lymphocyte antigen 6 complex, locus C                                                                                       |
| 102769_f_at | AB016248 | Sc5d             | sterol-C5-desaturase (fungal ERG3, delta-5-desaturase) homolog (S. cerevisiae)                                              |
| 97359_at    | AI851160 | Tm9sf1           | transmembrane 9 superfamily member 1                                                                                        |
| 160291_at   | AI838624 | Sec61a1          | Sec61 alpha 1 subunit (S. cerevisiae)                                                                                       |
| 101919_at   | M32309   | Zfx              | zinc finger protein X-linked                                                                                                |
| 101977_at   | AW121873 | Nudt3            | nudix (nucleotide diphosphate linked moiety X)-type motif 3                                                                 |
| 97484_at    | AI852704 | Zmynd11          | zinc finger, MYND domain containing 11                                                                                      |
| 104391_s_at | AI850563 | Clcn7            | chloride channel 7                                                                                                          |
| 160708_at   | AI840446 | Schip1           | schwannomin interacting protein 1                                                                                           |
| 95493_at    | X66405   | Col6a1           | procollagen, type VI, alpha 1                                                                                               |
| 103935_at   | AI504474 | Atp2a3           | ATPase, Ca++ transporting, ubiquitous                                                                                       |
| 92647_at    | U35141   | Rbbp4            | retinoblastoma binding protein 4                                                                                            |
| 95083_at    | X81581   | Igfbp3           | insulin-like growth factor binding protein 3                                                                                |
| 104341_at   | AW121406 | Z310014H01Rik    | RIKEN cDNA Z310014H01 gene                                                                                                  |
| 98891_at    | AW011716 | 1600012H06Rik    | RIKEN cDNA 1600012H06 gene                                                                                                  |
| 99674_at    | AW060297 | Mrpl43           | mitochondrial ribosomal protein L43                                                                                         |
| 98882_s_at  | AW047320 | Ndel1            | nuclear distribution gene E-like homolog 1 (A. nidulans)                                                                    |
| 95050_at    | AW124547 | Chordc1          | cysteine and histidine-rich domain (CHORD)-containing, zinc-binding protein 1                                               |
| 93336_at    | AW121539 | Tmed10           | transmembrane emp24-like trafficking protein 10 (yeast)                                                                     |
| 95648_at    | AA655507 | ---              | ---                                                                                                                         |
| 102798_at   | U77630   | Adm              | adrenomedullin                                                                                                              |
| 96578_r_at  | AI853019 | Ubap2l           | ubiquitin associated protein 2-like                                                                                         |
| 160907_at   | AI592789 | Slc38a5          | solute carrier family 38, member 5                                                                                          |
| 95567_at    | AW123947 | Sfrs2ip          | splicing factor, arginine/serine-rich 2, interacting protein                                                                |
| 95072_at    | AW121892 | Cyc1             | cytochrome c-1                                                                                                              |
| 97500_g_at  | AI839950 | Fhl1             | four and a half LIM domains 1                                                                                               |
| 96109_at    | U25096   | Klf2             | Kruppel-like factor 2 (lung)                                                                                                |
| 102349_at   | AI842849 | Adprhl2          | ADP-ribosylhydrolase like 2                                                                                                 |
| 103833_at   | AF077659 | Hipk2            | homeodomain interacting protein kinase 2                                                                                    |
| 92941_at    | AA833509 | 1110054M08Rik    | RIKEN cDNA 1110054M08 gene                                                                                                  |
| 93896_at    | D13903   | Ptprd            | protein tyrosine phosphatase, receptor type, D                                                                              |
| 161645_r_at | AV084197 | Atf3             | activating transcription factor 3                                                                                           |
| 103514_at   | AI850244 | Tnfrsf21         | tumor necrosis factor receptor superfamily, member 21                                                                       |
| 103544_at   | AI839083 | Pus1             | pseudouridine synthase 1                                                                                                    |
| 92289_at    | X58289   | Ptprb            | protein tyrosine phosphatase, receptor type, B                                                                              |
| 100139_at   | AI841733 | Pcsk1n           | proprotein convertase subtilisin/kexin type 1 inhibitor                                                                     |
| 100566_at   | L12447   | Igfbp5           | insulin-like growth factor binding protein 5                                                                                |
| 95588_at    | U89906   | Amacr            | alpha-methylacyl-CoA racemase                                                                                               |
| 97341_at    | AW124082 | Praf2            | PRA1 domain family 2                                                                                                        |
| 92497_at    | AB016257 | Slc22a4          | solute carrier family 22 (organic cation transporter), member 4                                                             |
| 101982_at   | X98475   | Vasp             | vasodilator-stimulated phosphoprotein                                                                                       |
| 95587_at    | AI837204 | Coq10a           | coenzyme Q10 homolog A (yeast)                                                                                              |
| 97871_at    | AW120614 | ---              | ---                                                                                                                         |
| 99162_at    | AW122398 | Smndc1           | survival motor neuron domain containing 1                                                                                   |
| 161129_r_at | AA144272 | Bag2             | Bcl2-associated athanogene 2                                                                                                |
| 161895_s_at | AV103742 | Wdr81            | WD repeat domain 81                                                                                                         |
| 95490_at    | AW120891 | Kdelr1           | KDEL (Lys-Asp-Glu-Leu) endoplasmic reticulum protein retention receptor 1                                                   |
