# Supplementary material
Source: PubMed Central journal article supplement (PMC4091824)
Supplement: NIHMS583353-supplement-Supplemental_Table_3.pdf [file NIHMS583353-supplement-Supplemental_Table_3.pdf]

Supplemental Table 3. Stem/Progenitor Cluster 2 (Cr &gt; Bu, 389 probesets)

| Probeset    | Accession # | Gene                  | Description                                                 | S&P 1 <sup>a</sup><br>(88) | Lemischka + Melton <sup>b</sup> |               |               | Shima et al. <sup>c</sup> | Oatley et al. <sup>d</sup> | Wang et al. <sup>e</sup> | RNA                           |
|-------------|-------------|-----------------------|-------------------------------------------------------------|----------------------------|---------------------------------|---------------|---------------|---------------------------|----------------------------|--------------------------|-------------------------------|
|             |             |                       |                                                             |                            | HSC<br>(2598)                   | NSC<br>(3036) | ESC<br>(2176) | Spermatogonia<br>(6102)   | Cultured SSCs<br>(4889)    | Spermatogonia<br>(13)    | Binding <sup>f</sup><br>(284) |
| 101882_s_at | U03715      | Col18a1               | procollagen, type XVIII, alpha 1                            |                            |                                 | X             | X             | X                         |                            |                          |                               |
| 98783_at    | Y15131      | Rbmy1a1               | RNA binding motif protein, Y chromosome, family 1, memt     | X                          | X                               | X             | X             | X                         | X                          | X                        | X                             |
| 100156_at   | D26090      | Mcm5                  | minichromosome maintenance deficient 5, cell division cyc   |                            |                                 | X             | X             | X                         |                            |                          |                               |
| 102418_at   | AA793009    | Tex19                 | testis expressed gene 19                                    |                            |                                 | X             | X             | X                         | X                          |                          |                               |
| 102627_at   | AF061569    | Igf2bp1               | insulin-like growth factor 2 mRNA binding protein 1         | X                          | X                               | X             | X             |                           |                            |                          |                               |
| 95063_at    | A1606257    | Cdca7                 | cell division cycle associated 7                            | X                          |                                 |               | X             | X                         |                            |                          |                               |
| 93360_at    | AF007267    | Pmm1                  | phosphomannomutase 1                                        |                            |                                 | X             |               | X                         |                            |                          |                               |
| 98108_at    | X15789      | Crabp1                | cellular retinoic acid binding protein I                    | X                          |                                 | X             | X             | X                         |                            |                          |                               |
| 161396_f_at | AV271976    | Ube2o                 | ubiquitin-conjugating enzyme E2O                            |                            | X                               |               | X             |                           |                            |                          |                               |
| 97519_at    | X13986      | Spp1                  | secreted phosphoprotein 1                                   |                            |                                 | X             | X             | X                         |                            |                          |                               |
| 101445_at   | AF036008    | Dnmt1                 | DNA methyltransferase (cytosine-5) 1                        |                            |                                 | X             | X             | X                         |                            |                          |                               |
| 103201_at   | M86377      | Ttk                   | Ttk protein kinase                                          |                            |                                 | X             | X             | X                         |                            |                          |                               |
| 92290_at    | Z19580      | Siah1b                | seven in absentia 1B                                        | X                          |                                 | X             | X             | X                         |                            |                          |                               |
| 94750_at    | U46694      | Dazl                  | deleted in azoospermia-like                                 |                            |                                 | X             | X             | X                         | X                          |                          | X                             |
| 93228_at    | U25691      | Hells                 | helicase, lymphoid specific                                 |                            | X                               | X             | X             |                           |                            |                          |                               |
| 101194_at   | Z75287      | Stra8                 | stimulated by retinoic acid gene 8                          |                            |                                 | X             | X             |                           | X                          |                          |                               |
| 160905_s_at | A1840713    | A030009H04Rik         | RIKEN cDNA A030009H04 gene                                  |                            |                                 | X             | X             | X                         |                            |                          |                               |
| 101883_s_at | L22977      | Xlr3a /// Xlr3b /// 1 | X-linked lymphocyte-regulated 3A /// X-linked lymphocyte-   | X                          |                                 | X             | X             | X                         |                            |                          |                               |
| 99564_at    | D87908      | Uhrf1                 | ubiquitin-like, containing PHD and RING finger domains, 1   |                            |                                 | X             | X             | X                         |                            |                          |                               |
| 92607_at    | AF017994    | Mest                  | mesoderm specific transcript                                | X                          |                                 | X             | X             | X                         |                            |                          |                               |
| 104097_at   | AF002823    | Bub1                  | budding uninhibited by benzimidazoles 1 homolog (S. cere    |                            |                                 | X             | X             | X                         |                            |                          |                               |
| 96591_at    | U24703      | Reln                  | reelin                                                      |                            |                                 |               | X             | X                         |                            |                          |                               |
| 94939_at    | X97227      | Cd53                  | CD53 antigen                                                |                            |                                 |               |               |                           |                            |                          |                               |
| 161787_f_at | AV363418    | Cdt1                  | chromatin licensing and DNA replication factor 1            | X                          |                                 | X             | X             |                           |                            |                          |                               |
| 103080_at   | U15635      | Samhd1                | SAM domain and HD domain, 1                                 |                            |                                 |               | X             | X                         |                            |                          |                               |
| 97820_at    | AB027012    | Galk1                 | galactokinase 1                                             |                            |                                 | X             | X             | X                         |                            |                          |                               |
| 104036_at   | A1845447    | Dpp7                  | dipeptidylpeptidase 7                                       |                            |                                 |               | X             | X                         |                            |                          |                               |
| 93397_at    | U56819      | Ccr2                  | chemokine (C-C motif) receptor 2                            | X                          |                                 |               |               |                           |                            |                          |                               |
| 94743_f_at  | M29009      | LOC214403             | complement factor H-related protein                         | X                          |                                 |               |               |                           |                            |                          |                               |
| 160159_at   | X64713      | Ccnb1-rs1 /// Ccn     | cyclin B1, related sequence 1 /// cyclin B1                 |                            |                                 | X             | X             | X                         |                            |                          |                               |
| 97994_at    | A1019193    | Tcf7                  | transcription factor 7, T-cell specific                     |                            |                                 | X             | X             | X                         |                            |                          |                               |
| 92180_at    | A1851599    | H1fx                  | H1 histone family, member X                                 |                            |                                 | X             | X             | X                         |                            |                          |                               |
| 100479_at   | AA756653    | Dnmt3a                | DNA methyltransferase 3A                                    | X                          |                                 | X             | X             |                           |                            |                          |                               |
| 103238_at   | M89797      | Wnt4                  | wingless-related MMTV integration site 4                    |                            |                                 |               |               |                           |                            |                          |                               |
| 103418_at   | AW122092    | Rfc4                  | replication factor C (activator 1) 4                        |                            |                                 | X             | X             | X                         |                            |                          |                               |
| 103545_at   | AA240695    | 2610019E17Rik         | RIKEN cDNA 2610019E17 gene                                  |                            | X                               |               | X             |                           |                            |                          |                               |
| 104388_at   | U49513      | Ccl9                  | chemokine (C-C motif) ligand 9                              |                            |                                 |               |               | X                         |                            |                          |                               |
| 96169_at    | AA683788    | Sall4                 | Sal-like 4 (Drosophila)                                     | X                          |                                 | X             | X             | X                         | X                          |                          |                               |
| 93497_at    | K02782      | C3                    | complement component 3                                      |                            |                                 |               | X             |                           |                            |                          |                               |
| 99641_at    | AW121364    | Dnbdd2                | dysbindin (dystrobrevin binding protein 1) domain containi  |                            |                                 | X             |               | X                         |                            |                          |                               |
| 92208_at    | A1152966    | C1qdc1                | C1q domain containing 1                                     | X                          | X                               |               | X             | X                         |                            |                          |                               |
| 98071_f_at  | X77731      | Dck                   | deoxycytidine kinase                                        |                            |                                 | X             | X             | X                         |                            |                          |                               |
| 160702_at   | AA791885    | Rbm35a                | RNA binding motif protein 35A                               | X                          |                                 |               | X             | X                         |                            |                          |                               |
| 104527_at   | D13803      | Rad51                 | RAD51 homolog (S. cerevisiae)                               |                            |                                 | X             | X             | X                         |                            |                          |                               |
| 101753_s_at | X51547      | Lyzs /// Lzp-s        | lysozyme /// P lysozyme structural                          |                            |                                 |               |               |                           |                            |                          |                               |
| 100024_at   | A1641895    | Shrm                  | shroom                                                      |                            | X                               | X             | X             | X                         |                            |                          |                               |
| 102764_at   | M36387      | Trap1a                | tumor rejection antigen P1A                                 |                            | X                               | X             | X             | X                         |                            |                          |                               |
| 103301_i_at | AA866668    | Sox3                  | SRY-box containing gene 3                                   | X                          |                                 | X             | X             | X                         |                            |                          |                               |
| 92692_at    | D88539      | Sycp1                 | synaptonemal complex protein 1                              |                            |                                 | X             | X             | X                         | X                          |                          |                               |
| 103212_at   | A1314784    | Cdca7l                | cell division cycle associated 7 like                       |                            | X                               | X             | X             | X                         |                            |                          |                               |
| 97206_at    | AW230369    | Spint1                | serine protease inhibitor, Kunitz type 1                    |                            |                                 | X             | X             | X                         |                            |                          |                               |
| 103057_at   | AF024570    | Pold1                 | polymerase (DNA directed), delta 1, catalytic subunit       |                            |                                 | X             | X             | X                         |                            |                          |                               |
| 101853_f_at | M12660      | Cfh                   | complement component factor h                               | X                          |                                 |               |               |                           |                            |                          |                               |
| 160819_at   | AW121600    | Ndrg4                 | N-myc downstream regulated gene 4                           |                            |                                 | X             | X             | X                         |                            |                          |                               |
| 96784_at    | AW123269    | Anln                  | anillin, actin binding protein (scraps homolog, Drosophila) |                            |                                 | X             | X             | X                         |                            |                          |                               |
| 101884_at   | A1451153    | Xlr4a                 | X-linked lymphocyte-regulated 4A                            |                            |                                 | X             | X             | X                         |                            |                          |                               |
| 99632_at    | U83902      | Mad21                 | MAD2 (mitotic arrest deficient, homolog)-like 1 (yeast)     |                            |                                 | X             | X             | X                         |                            |                          |                               |
| 98807_at    | L10666      | Gnat2                 | guanine nucleotide binding protein, alpha transducing 2     |                            |                                 | X             | X             | X                         |                            |                          |                               |
| 94761_at    | X70058      | Ccl7                  | chemokine (C-C motif) ligand 7                              | X                          |                                 | X             | X             |                           |                            |                          |                               |
| 161968_f_at | AV370035    | Ccr5                  | chemokine (C-C motif) receptor 5                            | X                          |                                 |               |               |                           |                            |                          |                               |
| 161856_f_at | AV059766    | Kif20a                | kinesin family member 20A                                   |                            |                                 | X             | X             |                           |                            |                          |                               |
| 104116_at   | AW124049    | D5Ert593e             | DNA segment, Chr 5, ERATO Doi 593, expressed                | X                          | X                               |               | X             |                           |                            |                          |                               |
| 93112_at    | D86725      | Mcm2                  | minichromosome maintenance deficient 2 mitotin (S. cerev    | X                          |                                 | X             | X             | X                         |                            |                          |                               |
| 100465_i_at | AA655823    | Gm1673                | gene model 1673, (NCBI)                                     |                            | X                               | X             | X             |                           |                            |                          |                               |
| 104576_at   | AW212397    | Ski                   | Sloan-Kettering viral oncogene homolog                      | X                          | X                               |               | X             | X                         |                            |                          |                               |

|             |          |                                                                   |                                                                 |   |  |   |   |   |   |   |   |   |
|-------------|----------|-------------------------------------------------------------------|-----------------------------------------------------------------|---|--|---|---|---|---|---|---|---|
| 93371_at    | U88064   | Bnc1                                                              | basonuclin 1                                                    |   |  | X |   |   | X | X |   |   |
| 96047_at    | U63146   | Rbp4                                                              | retinol binding protein 4, plasma                               | X |  |   |   |   | X | X |   |   |
| 101160_at   | X53798   | Cxcl2                                                             | chemokine (C-X-C motif) ligand 2                                | X |  |   |   |   | X |   |   |   |
| 93441_at    | AI595322 | 2700099C18Rik                                                     | RIKEN cDNA 2700099C18 gene                                      |   |  | X |   |   | X |   |   |   |
| 100325_at   | M65027   | Gp49a                                                             | glycoprotein 49 A                                               | X |  |   |   |   | X | X |   |   |
| 92291_f_at  | M29008   | Cfhr1                                                             | complement factor H-related 1                                   | X |  |   |   |   |   |   |   |   |
| 97444_at    | AI844520 | Ifi30                                                             | interferon gamma inducible protein 30                           | X |  |   |   |   | X | X |   |   |
| 93028_at    | X58196   | H19                                                               | H19 fetal liver mRNA                                            | X |  | X | X |   | X | X |   |   |
| 102710_at   | AF020313 | Apbb1ip                                                           | amyloid beta (A4) precursor protein-binding, family B, men      | X |  | X |   |   | X |   |   |   |
| 160501_at   | Y09632   | Kif20a                                                            | kinesin family member 20A                                       |   |  |   | X | X | X | X |   |   |
| 97356_at    | AI839653 | 1810008O21Rik                                                     | RIKEN cDNA 1810008O21 gene                                      | X |  |   |   |   |   |   |   | X |
| 104680_at   | AJ250489 | Ramp1                                                             | receptor (calcitonin) activity modifying protein 1              | X |  | X |   |   |   |   |   |   |
| 99578_at    | U01915   | Top2a                                                             | topoisomerase (DNA) II alpha                                    |   |  |   |   |   | X | X |   |   |
| 161984_f_at | AV234303 | Col3a1                                                            | procollagen, type III, alpha 1                                  | X |  |   |   |   | X |   |   |   |
| 96020_at    | M22531   | C1qb                                                              | complement component 1, q subcomponent, beta polypep            |   |  |   |   |   |   |   |   |   |
| 101676_at   | U13705   | Gpx3                                                              | glutathione peroxidase 3                                        |   |  |   |   |   |   |   |   |   |
| 104374_at   | M64086   | Serpina3n                                                         | serine (or cysteine) peptidase inhibitor, clade A, member 3     |   |  |   |   |   |   |   |   |   |
| 94162_at    | D14859   | Ddx4                                                              | DEAD (Asp-Glu-Ala-Asp) box polypeptide 4                        |   |  |   | X |   | X |   | X | X |
| 100611_at   | M21050   | Lyzs                                                              | lysozyme                                                        |   |  |   |   |   | X |   |   |   |
| 161698_f_at | AV232762 | Rprc1                                                             | arginine/proline rich coiled-coil 1                             | X |  | X |   |   | X |   |   |   |
| 100397_at   | AF024637 | Tyrobp                                                            | TYRO protein tyrosine kinase binding protein                    | X |  |   |   |   |   |   |   |   |
| 98817_at    | Z29532   | Fst                                                               | folliculin                                                      | X |  |   |   |   |   |   | X |   |
| 102736_at   | M19681   | Ccl2                                                              | chemokine (C-C motif) ligand 2                                  |   |  |   | X |   | X |   |   |   |
| 102348_at   | AI551087 | LOC432823                                                         | similar to hypothetical protein MGC37588                        |   |  |   |   |   | X | X |   |   |
| 94982_f_at  | AI852470 | Nme3                                                              | expressed in non-metastatic cells 3                             | X |  | X |   |   | X |   |   |   |
| 98587_at    | X61449   | Nap11l                                                            | nucleosome assembly protein 1-like 1                            |   |  |   | X | X | X | X |   |   |
| 92202_g_at  | AI553024 | Zbtb16                                                            | zinc finger and BTB domain containing 16                        |   |  |   |   |   | X | X |   |   |
| 103033_at   | X06454   | C4b /// C4a /// LC                                                | complement component 4B (Childo blood group) /// compl          | X |  | X |   |   | X |   |   |   |
| 103075_at   | M34381   | Pou5f1                                                            | POU domain, class 5, transcription factor 1                     | X |  |   | X |   | X | X |   |   |
| 99571_at    | AW012588 | Acaa1b                                                            | acetyl-Coenzyme A acyltransferase 1B                            |   |  |   |   |   | X | X |   |   |
| 103644_at   | D13139   | Dpep1                                                             | dipeptidase 1 (renal)                                           |   |  |   |   |   |   |   |   |   |
| 160420_r_at | M13442   | Tuba3                                                             | tubulin, alpha 3                                                |   |  | X |   | X | X |   | X |   |
| 160890_at   | AW214587 | Lbr                                                               | lamin B receptor                                                |   |  |   |   |   | X | X |   |   |
| 162483_f_at | AV112006 | Col18a1                                                           | Procollagen, type XVIII, alpha 1                                | X |  |   | X |   | X |   |   |   |
| 104544_at   | AA675604 | 4930517K11Rik                                                     | RIKEN cDNA 4930517K11 gene                                      |   |  |   |   | X | X | X |   | X |
| 100955_at   | AA989957 | Ube2t                                                             | ubiquitin-conjugating enzyme E2T (putative)                     |   |  | X | X | X | X | X |   |   |
| 160583_at   | AA880988 | Xlkd1                                                             | extra cellular link domain-containing 1                         |   |  |   |   |   |   |   |   |   |
| 98045_s_at  | U18869   | Dab2                                                              | disabled homolog 2 (Drosophila)                                 |   |  |   | X |   | X | X |   |   |
| 101019_at   | U74683   | Ctsc                                                              | cathepsin C                                                     | X |  |   | X |   | X |   |   |   |
| 99457_at    | X82786   | Mki67 /// LOC638                                                  | antigen identified by monoclonal antibody Ki 67 /// similar t   |   |  |   | X |   | X | X |   |   |
| 103981_at   | AI842281 | U2af1-rs2                                                         | U2 small nuclear ribonucleoprotein auxiliary factor (U2AF)      | X |  | X | X |   | X | X |   | X |
| 100998_at   | M21932   | H2-Ab1                                                            | histocompatibility 2, class II antigen A, beta 1                |   |  |   |   |   |   |   |   |   |
| 95139_at    | AW122075 | Wipi2                                                             | WD repeat domain, phosphoinositide interacting 2                |   |  | X |   |   | X |   |   |   |
| 98562_at    | X58861   | C1qa                                                              | complement component 1, q subcomponent, alpha polype            |   |  |   |   |   |   |   |   |   |
| 94387_at    | AF016544 | Spata5                                                            | spermatogenesis associated 5                                    |   |  |   | X | X | X | X |   |   |
| 97445_at    | AW122022 | Ppid                                                              | peptidylprolyl isomerase D (cyclophilin D)                      |   |  | X | X | X | X |   |   |   |
| 97487_at    | X70296   | Serpine2                                                          | serine (or cysteine) peptidase inhibitor, clade E, member 2     | X |  |   | X |   | X | X |   |   |
| 92617_at    | X62581   | Ube1y1                                                            | ubiquitin-activating enzyme E1, Chr Y 1                         |   |  |   |   | X | X | X |   |   |
| 99638_at    | D17546   | Col18a1                                                           | procollagen, type XVIII, alpha 1                                |   |  | X |   | X | X | X |   |   |
| 92223_at    | X66295   | C1qc                                                              | complement component 1, q subcomponent, C chain                 |   |  |   |   |   |   |   |   |   |
| 92633_at    | AJ242663 | Ctsz                                                              | cathepsin Z                                                     |   |  |   |   |   | X | X |   |   |
| 160648_at   | AI047076 | Figl1                                                             | figetin-like 1                                                  |   |  |   | X | X | X | X |   |   |
| 101464_at   | V00755   | Timp1                                                             | tissue inhibitor of metalloproteinase 1                         |   |  |   |   | X | X | X |   |   |
| 160068_at   | AF075136 | Sap30                                                             | sin3 associated polypeptide                                     |   |  |   | X | X | X | X |   |   |
| 97295_at    | AW122331 | Cdca8                                                             | cell division cycle associated 8                                |   |  |   | X |   | X | X |   |   |
| 103899_at   | AA690863 | Atp11a                                                            | ATPase, class VI, type 11A                                      |   |  |   | X |   | X | X |   |   |
| 161006_at   | AI853978 | Slco3a1                                                           | solute carrier organic anion transporter family, member 3a      |   |  | X |   |   | X |   |   |   |
| 104263_at   | AA914734 | Zmym6                                                             | zinc finger, MYM-type 6                                         |   |  | X | X |   | X |   |   |   |
| 92665_f_at  | X07967   | Xlr /// 3830403N1                                                 | X-linked lymphocyte-regulated complex /// RIKEN cDNA 3          |   |  |   |   |   | X | X |   |   |
| 104237_at   | AI838071 | Pcbd2                                                             | pterin 4 alpha carbinolamine dehydratase/dimerization cof       | X |  |   |   |   |   | X |   |   |
| 96779_f_at  | AI846315 | 2410022L05Rik                                                     | RIKEN cDNA 2410022L05 gene                                      |   |  | X | X | X | X | X |   |   |
| 95471_at    | U22399   | Cdkn1c                                                            | cyclin-dependent kinase inhibitor 1C (P57)                      |   |  | X |   | X | X | X |   |   |
| 94805_f_at  | M33988   | Hist3h2a /// Hist1                                                | histone 3, H2a /// histone 1, H2ac /// histone 1, H2ad /// his  |   |  |   |   |   | X |   |   |   |
| 104719_at   | AI182203 | Slc12a7                                                           | solute carrier family 12, member 7                              |   |  | X |   |   | X | X |   |   |
| 104155_f_at | U19118   | Atf3                                                              | activating transcription factor 3                               |   |  | X | X |   | X |   |   |   |
| 92306_at    | X96603   | Ott /// LOC38224                                                  | ovary testis transcribed /// similar to ovary testis transcribe |   |  | X |   | X | X | X |   | X |
| 98136_at    | AF031486 | Sms /// LOC6718                                                   | spermine synthase /// similar to Spermine synthase (Sperr       |   |  |   | X | X | X | X |   |   |
| 93538_at    | AW228036 | Ttrap                                                             | Traf and Tnf receptor associated protein                        | X |  |   | X | X | X | X |   |   |
| 101948_at   | X05212   | Lamb1-1                                                           | laminin B1 subunit 1                                            |   |  |   |   | X | X | X |   |   |
| 160682_at   | AI851770 | C330011F01Rik ; RIKEN cDNA C330011F01 gene /// RIKEN cDNA 643070f |                                                                 |   |  |   |   |   | X | X |   |   |

|             |          |                   |                                                               |   |   |   |   |   |   |   |
|-------------|----------|-------------------|---------------------------------------------------------------|---|---|---|---|---|---|---|
| 100574_f_at | L09104   | Gpi1              | glucose phosphate isomerase 1                                 |   |   |   |   | X | X |   |
| 92590_at    | U12791   | Hmgcs2            | 3-hydroxy-3-methylglutaryl-Coenzyme A synthase 2              |   |   |   |   |   |   |   |
| 96319_at    | AW061324 | Cdc20             | cell division cycle 20 homolog (S. cerevisiae)                |   | X | X |   | X | X |   |
| 96244_at    | AB025313 | Uchl1             | ubiquitin carboxy-terminal hydrolase L1                       |   | X | X |   | X | X |   |
| 96726_at    | AW049619 | Cdk8              | cyclin-dependent kinase 8                                     |   | X | X |   | X | X |   |
| 101881_g_at | L22545   | Col18a1           | procollagen, type XVIII, alpha 1                              |   | X | X | X | X | X |   |
| 96818_at    | AA762522 | Dtx2              | deltex 2 homolog (Drosophila)                                 |   | X |   |   | X |   |   |
| 103302_r_at | AA866668 | Sox3              | SRY-box containing gene 3                                     |   |   | X |   | X | X |   |
| 94034_at    | A1839882 | Rexo2             | REX2, RNA exonuclease 2 homolog (S. cerevisiae)               |   |   | X | X | X | X |   |
| 92925_at    | M61007   | Cebpβ             | CCAAT/enhancer binding protein (C/EBP), beta                  |   | X |   |   | X | X |   |
| 98996_at    | L29480   | Plk4              | polo-like kinase 4 (Drosophila)                               |   |   | X | X | X | X |   |
| 98988_at    | AA614971 | Nfkbiz            | nuclear factor of kappa light polypeptide gene enhancer in    |   | X |   |   | X | X |   |
| 98623_g_at  | X71922   | Igf2              | insulin-like growth factor 2                                  |   |   |   | X | X |   |   |
| 104337_f_at | AW208938 | Pkp2              | plakophilin 2                                                 | X | X | X |   | X | X |   |
| 97421_at    | U42385   | Smc2l1            | SMC2 structural maintenance of chromosomes 2-like 1 (ye       |   |   | X | X | X | X |   |
| 98129_at    | A1852553 | Tmsb10            | thymosin, beta 10                                             |   | X | X |   | X | X |   |
| 96628_at    | X54327   | Eprs /// LOC6336  | glutamyl-prolyl-tRNA synthetase /// similar to Bifunctional ε |   | X | X | X | X | X |   |
| 97013_f_at  | AW046124 | Cyba              | cytochrome b-245, alpha polypeptide                           |   |   |   |   | X |   |   |
| 93750_at    | J04953   | Gsn               | gelsolin                                                      |   |   |   |   | X | X |   |
| 101869_s_at | J00413   | Hbb-b1 /// Hbb-b2 | hemoglobin, beta adult major chain /// hemoglobin, beta ac    |   |   |   |   | X |   |   |
| 104156_r_at | U19118   | Atf3              | activating transcription factor 3                             | X | X |   |   | X |   |   |
| 92458_at    | AJ003133 | Orc1              | origin recognition complex, subunit 1-like (S.cerevisiae)     |   |   | X | X | X | X |   |
| 160749_at   | A1846812 | 1500011H22Rik     | RIKEN cDNA 1500011H22 gene                                    |   | X |   |   | X | X |   |
| 93041_at    | D26089   | Mcm4              | minichromosome maintenance deficient 4 homolog (S. cer        | X |   | X | X | X | X |   |
| 103534_at   | V00722   | Hbb-b2            | hemoglobin, beta adult minor chain                            | X |   |   |   | X |   |   |
| 103081_at   | AA863928 | Baz1b             | bromodomain adjacent to zinc finger domain, 1B                | X |   |   |   | X | X |   |
| 101130_at   | X58251   | Col1a2            | procollagen, type I, alpha 2                                  |   |   |   | X | X | X |   |
| 93008_at    | AW120557 | Lsm4              | LSM4 homolog, U6 small nuclear RNA associated (S. cere        |   |   | X |   | X | X | X |
| 98627_at    | X81580   | Igfbp2            | insulin-like growth factor binding protein 2                  |   |   | X | X | X | X |   |
| 160827_at   | A1835968 | Rin2              | Ras and Rab interactor 2                                      |   | X |   |   | X |   |   |
| 100576_at   | U57746   | Pafah1b3          | platelet-activating factor acetylhydrolase, isoform 1b, alpha |   |   | X |   | X | X |   |
| 162263_f_at | AV357656 | Lamb1-1           | laminin B1 subunit 1                                          |   |   | X | X | X |   |   |
| 103904_at   | X81584   | Igfbp6            | insulin-like growth factor binding protein 6                  |   |   |   |   | X | X |   |
| 96083_s_at  | A1226368 | Hnrpd1            | heterogeneous nuclear ribonucleoprotein D-like                | X |   |   |   | X | X | X |
| 103449_at   | AA795923 | Lsm14b            | LSM14 homolog B (SCD6, S. cerevisiae)                         | X |   | X |   | X | X |   |
| 100134_at   | X77952   | Eng               | endoglin                                                      |   | X |   |   | X |   |   |
| 95034_f_at  | AW212243 | Ipo4              | importin 4                                                    |   | X |   |   | X | X |   |
| 94305_at    | U03419   | Col1a1            | procollagen, type I, alpha 1                                  |   |   |   |   | X | X |   |
| 100607_at   | AF026124 | Pld3              | phospholipase D family, member 3                              |   | X |   |   | X |   |   |
| 98092_at    | AA790307 | Plac8             | placenta-specific 8                                           | X |   |   |   | X |   |   |
| 160171_f_at | A1854821 | Acot9             | acyl-CoA thioesterase 9                                       |   |   |   | X | X | X |   |
| 94510_at    | A1853476 | Wdr77             | WD repeat domain 77                                           |   |   | X | X | X | X |   |
| 96886_at    | AW060556 | Stab1             | stabilin 1                                                    | X |   |   |   | X |   |   |
| 99081_at    | AF010254 | Serping1          | serine (or cysteine) peptidase inhibitor, clade G, member 1   |   | X |   |   | X | X |   |
| 98543_at    | AJ223208 | Ctss              | cathepsin S                                                   |   |   |   |   | X |   |   |
| 94781_at    | V00714   | Hba-a1            | hemoglobin alpha, adult chain 1                               |   |   |   |   | X |   |   |
| 93294_at    | M70642   | Ctgf              | connective tissue growth factor                               |   |   |   | X | X |   |   |
| 94294_at    | X66032   | Ccnb2             | cyclin B2                                                     |   |   | X |   | X | X |   |
| 102292_at   | U00937   | Gadd45a           | growth arrest and DNA-damage-inducible 45 alpha               |   |   |   | X | X | X |   |
| 161214_r_at | AV265258 | BC037034          | cDNA sequence BC037034                                        |   | X |   |   | X |   |   |
| 162206_f_at | AV374868 | Socs3             | suppressor of cytokine signaling 3                            |   | X |   |   | X |   |   |
| 103789_at   | A1854614 | Brd4              | bromodomain containing 4                                      |   |   |   |   | X |   |   |
| 160633_at   | U89876   | Thoc4             | THO complex 4                                                 |   |   | X |   | X | X | X |
| 97336_at    | AJ131851 | Ctsf              | cathepsin F                                                   |   | X |   |   | X |   |   |
| 104311_at   | AW125241 | Ubx2              | UBX domain containing 2                                       |   | X | X |   | X | X |   |
| 103707_at   | U77461   | C3ar1             | complement component 3a receptor 1                            |   |   |   |   | X |   |   |
| 99537_at    | AF100694 | Ruvb1             | RuvB-like protein 1                                           |   |   | X | X | X | X |   |
| 160458_at   | A1853261 | Mcam              | melanoma cell adhesion molecule                               | X |   |   |   | X | X |   |
| 93319_at    | U20238   | Rasa3             | RAS p21 protein activator 3                                   |   | X | X |   | X | X |   |
| 94367_at    | A1850362 | Uck2              | uridine-cytidine kinase 2                                     |   | X |   | X | X | X |   |
| 93356_at    | D26091   | Mcm7              | minichromosome maintenance deficient 7 (S. cerevisiae)        |   |   | X |   | X | X |   |
| 102317_at   | AF061516 | Vamp4             | vesicle-associated membrane protein 4                         |   |   | X |   | X | X |   |
| 101487_f_at | U47737   | Ly6e              | lymphocyte antigen 6 complex, locus E                         |   |   |   |   | X |   |   |
| 101947_at   | AB028921 | Akap8l            | A kinase (PRKA) anchor protein 8-like                         |   | X |   |   | X | X |   |
| 95627_at    | AW046038 | Wwtr1             | WW domain containing transcription regulator 1                | X |   |   |   | X | X |   |
| 93270_at    | A1839918 | Gars              | glycyl-tRNA synthetase                                        |   | X | X | X | X | X |   |
| 97527_at    | AA681998 | Cks2              | CDC28 protein kinase regulatory subunit 2                     |   |   | X | X | X | X |   |
| 93999_at    | AW060597 | Snrpg /// LOC666  | small nuclear ribonucleoprotein polypeptide G /// similar to  |   |   | X | X | X | X | X |
| 96625_at    | AW123132 | Wdhd1             | WD repeat and HMG-box DNA binding protein 1                   |   |   | X |   | X | X |   |
| 104354_at   | X06368   | Csf1r             | colony stimulating factor 1 receptor                          |   |   |   |   | X |   |   |

|             |          |                                                                            |                                                               |   |   |   |   |   |   |   |   |
|-------------|----------|----------------------------------------------------------------------------|---------------------------------------------------------------|---|---|---|---|---|---|---|---|
| 160426_at   | D31966   | Rpo1-1                                                                     | RNA polymerase 1-1                                            |   |   |   | X | X | X | X |   |
| 96891_at    | A1842771 | Anp32b /// LOC6: acidic nuclear phosphoprotein 32 family, member B /// sim |                                                               | X |   |   | X |   | X | X |   |
| 97750_at    | X06406   | Rpsa                                                                       | ribosomal protein SA                                          | X |   |   |   |   | X | X |   |
| 94240_i_at  | L08651   | Rpl29 /// LOC240                                                           | ribosomal protein L29 /// similar to 60S ribosomal protein L  |   |   |   |   |   |   | X |   |
| 161514_at   | AV170770 | ---                                                                        | ---                                                           |   |   |   | X | X | X |   |   |
| 94954_at    | A1846628 | Anapc4                                                                     | anaphase promoting complex subunit 4                          | X | X | X |   |   | X | X |   |
| 96038_at    | A1840339 | Rnase4                                                                     | ribonuclease, RNase A family 4                                |   |   |   |   |   | X | X |   |
| 103051_at   | X93037   | Expi                                                                       | extracellular proteinase inhibitor                            |   |   | X |   |   |   |   |   |
| 103277_s_at | AF071310 | Med12                                                                      | mediator of RNA polymerase II transcription, subunit 12 hc    |   |   | X |   |   | X | X |   |
| 103016_s_at | X68273   | Cd68                                                                       | CD68 antigen                                                  | X |   |   |   |   | X | X |   |
| 96138_at    | AA682129 | Mars                                                                       | methionine-tRNA synthetase                                    | X |   | X | X |   | X | X |   |
| 97199_at    | A1854767 | Rbm12 /// Cpne1                                                            | RNA binding motif protein 12 /// copine 1                     | X |   |   |   |   | X | X | X |
| 95641_at    | A1853899 | Plac9                                                                      | placenta specific 9                                           | X | X |   | X |   |   |   |   |
| 94285_at    | X00958   | H2-Eb1                                                                     | histocompatibility 2, class II antigen E beta                 |   |   |   |   |   |   |   |   |
| 98624_at    | X75316   | Rnpc1                                                                      | RNA-binding region (RNP1, RRM) containing 1                   | X | X |   |   |   | X | X | X |
| 92232_at    | U88328   | Socs3                                                                      | suppressor of cytokine signaling 3                            |   |   | X | X | X | X | X |   |
| 92539_at    | M16465   | S100a10                                                                    | S100 calcium binding protein A10 (calpactin)                  |   |   |   |   |   | X | X |   |
| 94932_at    | M29464   | Pdgfra                                                                     | platelet derived growth factor, alpha                         |   |   | X |   |   | X | X |   |
| 99475_at    | U88327   | Socs2                                                                      | suppressor of cytokine signaling 2                            | X | X | X | X |   | X |   |   |
| 93987_f_at  | AW121568 | Rpl221                                                                     | ribosomal protein L22 like 1                                  |   |   |   |   |   | X | X |   |
| 98059_s_at  | D49733   | Lmna                                                                       | lamin A                                                       | X | X |   | X |   | X | X |   |
| 98088_at    | X13333   | Cd14                                                                       | CD14 antigen                                                  | X |   |   |   |   | X |   |   |
| 100720_at   | X65553   | Pabpc1                                                                     | poly A binding protein, cytoplasmic 1                         |   |   | X |   |   | X | X | X |
| 104738_at   | D63784   | Dnajc2                                                                     | DnaJ (Hsp40) homolog, subfamily C, member 2                   |   |   | X | X | X | X | X |   |
| 101093_at   | M15832   | Col4a1                                                                     | procollagen, type IV, alpha 1                                 |   |   | X |   |   | X | X |   |
| 94466_f_at  | U19891   | Cebpz                                                                      | CCAAT/enhancer binding protein zeta                           |   |   | X | X | X | X | X |   |
| 95791_s_at  | U14648   | Sfrs2                                                                      | splicing factor, arginine/serine-rich 2 (SC-35)               | X | X | X | X | X | X | X | X |
| 160503_at   | Z22593   | Fbl                                                                        | fibrillarin                                                   |   |   | X | X |   | X | X | X |
| 97923_at    | AW046532 | Herc1                                                                      | hect (homologous to the E6-AP (UBE3A) carboxyl terminu        |   |   | X |   |   | X | X |   |
| 104524_at   | A1842825 | Gltp                                                                       | glycolipid transfer protein                                   | X |   |   |   |   | X |   |   |
| 98564_f_at  | U67770   | Rps26                                                                      | ribosomal protein S26                                         |   |   |   |   |   | X | X |   |
| 92794_f_at  | M35970   | Nme1                                                                       | expressed in non-metastatic cells 1, protein                  | X |   | X |   |   | X |   |   |
| 94354_at    | A1845514 | Abca1                                                                      | ATP-binding cassette, sub-family A (ABC1), member 1           |   |   | X | X |   | X | X |   |
| 97446_at    | AW125010 | Dhx30                                                                      | DEAH (Asp-Glu-Ala-His) box polypeptide 30                     |   |   | X |   |   | X | X |   |
| 103916_at   | A1850713 | 8430420C20Rik                                                              | RIKEN cDNA 8430420C20 gene                                    | X | X |   |   |   | X |   |   |
| 99101_at    | AB012580 | Eif3s7                                                                     | eukaryotic translation initiation factor 3, subunit 7 (zeta)  |   |   | X |   |   | X | X |   |
| 102255_at   | AB015978 | Osmr                                                                       | oncostatin M receptor                                         |   |   |   |   |   | X | X |   |
| 97426_at    | X98471   | Emp1                                                                       | epithelial membrane protein 1                                 |   |   | X |   | X | X | X |   |
| 95944_at    | AV299153 | Dhx36                                                                      | DEAH (Asp-Glu-Ala-His) box polypeptide 36                     | X |   |   |   |   | X | X |   |
| 97200_f_at  | X65704   | Snrpe                                                                      | small nuclear ribonucleoprotein E                             |   |   |   |   |   | X | X | X |
| 96605_at    | A1787183 | 0610011104Rik                                                              | RIKEN cDNA 0610011104 gene                                    |   |   | X | X |   |   |   |   |
| 100468_g_at | X57687   | Lyl1                                                                       | lymphoblastomic leukemia                                      | X | X |   |   |   | X |   |   |
| 94817_at    | X60676   | Serpinh1                                                                   | serine (or cysteine) peptidase inhibitor, clade H, member 1   |   |   | X | X | X | X | X |   |
| 104126_at   | A1854864 | Cstf2t                                                                     | cleavage stimulation factor, 3' pre-RNA subunit 2, tau        |   |   | X | X |   | X | X | X |
| 93994_at    | AW212131 | Chpt1                                                                      | choline phosphotransferase 1                                  |   |   | X |   |   | X | X |   |
| 95616_at    | AA674714 | Crsp3                                                                      | cofactor required for Sp1 transcriptional activation, subunit |   |   | X | X | X | X | X |   |
| 98331_at    | X52046   | Col3a1                                                                     | procollagen, type III, alpha 1                                |   |   | X |   |   | X | X |   |
| 93534_at    | X53929   | Dcn                                                                        | decorin                                                       |   |   |   |   | X | X |   |   |
| 100941_at   | AF039567 | Pias2                                                                      | protein inhibitor of activated STAT 2                         |   |   | X | X |   | X |   |   |
| 94839_at    | M96823   | Nucb1                                                                      | nucleobindin 1                                                | X | X |   |   |   | X | X |   |
| 101890_f_at | U53208   | Dnajc2                                                                     | DnaJ (Hsp40) homolog, subfamily C, member 2                   |   |   | X | X | X | X | X |   |
| 101440_at   | AW047074 | 2900006F19Rik                                                              | RIKEN cDNA 2900006F19 gene                                    |   |   | X | X |   | X | X |   |
| 98346_at    | A1593759 | Lrrc54                                                                     | leucine rich repeat containing 54                             | X | X | X | X |   | X |   |   |
| 93295_at    | Z31555   | Cct5                                                                       | chaperonin subunit 5 (epsilon)                                |   |   | X | X |   | X | X |   |
| 95707_at    | AA615853 | 2900010M23Rik                                                              | RIKEN cDNA 2900010M23 gene                                    |   |   | X |   |   | X | X |   |
| 101065_at   | X57800   | Pcna                                                                       | proliferating cell nuclear antigen                            |   |   | X |   |   | X | X |   |
| 92632_at    | A1842328 | Calm3                                                                      | calmodulin 3                                                  |   |   |   |   |   | X | X |   |
| 102409_at   | AW046963 | Lsm8                                                                       | LSM8 homolog, U6 small nuclear RNA associated (S. cere        |   |   |   | X | X | X | X | X |
| 95715_at    | AW125739 | Eif3s12                                                                    | eukaryotic translation initiation factor 3, subunit 12        |   |   | X |   |   | X | X |   |
| 100957_at   | AA881160 | Ssbp1                                                                      | single-stranded DNA binding protein 1                         | X |   | X | X |   | X | X |   |
| 93500_at    | M63245   | Alas1                                                                      | aminolevulinic acid synthase 1                                |   |   |   |   |   | X | X |   |
| 101054_at   | X00496   | Cd74                                                                       | CD74 antigen (invariant polypeptide of major histocompati     |   |   |   |   |   |   |   |   |
| 92577_f_at  | AW047116 | Rpl37                                                                      | ribosomal protein L37                                         |   |   |   |   |   | X | X | X |
| 160482_at   | A1841705 | Acaa1a                                                                     | acetyl-Coenzyme A acyltransferase 1A                          |   |   |   |   |   | X | X |   |
| 160603_at   | AF000294 | Pparbp                                                                     | peroxisome proliferator activated receptor binding protein    |   |   |   |   |   | X | X |   |
| 95430_f_at  | A1854154 | Spg21                                                                      | spastic paraplegia 21 homolog (human)                         |   |   |   |   |   | X |   |   |
| 95732_at    | AW047746 | Sf3b5                                                                      | splicing factor 3b, subunit 5                                 |   |   | X |   |   | X | X |   |
| 160150_f_at | AW125626 | Cnn3                                                                       | calponin 3, acidic                                            |   |   | X |   |   | X | X |   |
| 95058_f_at  | AW121984 | Brp44                                                                      | brain protein 44                                              |   |   |   |   |   | X | X |   |
| 96698_at    | A1835520 | Psmd5                                                                      | proteasome (prosome, macropain) 26S subunit, non-ATPz         |   |   | X | X |   | X | X |   |

|             |          |                   |                                                               |   |   |   |   |   |   |   |
|-------------|----------|-------------------|---------------------------------------------------------------|---|---|---|---|---|---|---|
| 95586_at    | AF089751 | P2rx4             | purinergic receptor P2X, ligand-gated ion channel 4           |   |   |   | X |   |   |   |
| 103342_at   | U78103   | Eed               | embryonic ectoderm development                                |   |   | X | X | X | X | X |
| 95282_at    | J04633   | Hsp90aa1          | heat shock protein 90kDa alpha (cytosolic), class A memb      |   |   |   | X | X | X | X |
| 100030_at   | D44464   | Upp1              | uridine phosphorylase 1                                       |   | X | X | X |   |   |   |
| 96212_at    | A1853918 | Z310061104Rik     | RIKEN cDNA Z310061104 gene                                    |   |   |   |   | X | X |   |
| 94516_f_at  | M55181   | Penk1             | preproenkephalin 1                                            |   |   |   |   | X | X |   |
| 94024_at    | AA671429 | Cdt1              | chromatin licensing and DNA replication factor 1              | X |   |   |   | X | X |   |
| 160182_at   | A1846595 | Sfrs6             | splicing factor, arginine/serine-rich 6                       | X | X | X | X | X | X | X |
| 99602_at    | AF064088 | Klf10             | Kruppel-like factor 10                                        |   |   | X |   | X | X |   |
| 103910_at   | AJ249987 | Taf10             | TAF10 RNA polymerase II, TATA box binding protein (TBF        |   |   |   |   | X | X |   |
| 104549_at   | A1844761 | Aqr               | aquarius                                                      |   |   | X | X | X | X |   |
| 100578_at   | M33934   | Impdh2            | inosine 5'-phosphate dehydrogenase 2                          |   |   | X | X | X | X |   |
| 100732_at   | X73829   | Rps8              | ribosomal protein S8                                          | X |   |   |   | X | X |   |
| 93968_at    | AA870917 | Pdcd5             | programmed cell death 5                                       |   |   | X | X | X | X |   |
| 93078_at    | X04653   | Ly6a              | lymphocyte antigen 6 complex, locus A                         |   | X |   |   |   | X |   |
| 92777_at    | M32490   | Cyr61             | cysteine rich protein 61                                      |   |   | X | X | X | X |   |
| 101137_at   | X76772   | Rps3              | ribosomal protein S3                                          |   |   |   |   | X | X | X |
| 98934_at    | A1847513 | O610007P06Rik     | RIKEN cDNA O610007P06 gene                                    | X |   |   | X | X | X |   |
| 95634_at    | A1848107 | O610010K14Rik     | RIKEN cDNA O610010K14 gene                                    |   |   | X | X | X | X |   |
| 96813_f_at  | A1852973 | Otud5             | OTU domain containing 5                                       |   | X |   |   | X |   |   |
| 100144_at   | X07699   | Ncl               | nucleolin                                                     |   |   | X |   | X | X | X |
| 92829_at    | U09659   | Hspe1             | heat shock protein 1 (chaperonin 10)                          |   |   | X | X | X | X |   |
| 94810_at    | X79233   | Ewsr1             | Ewing sarcoma breakpoint region 1                             |   |   |   |   | X | X | X |
| 160102_at   | Z37164   | Cct8              | chaperonin subunit 8 (theta)                                  |   |   | X | X | X | X |   |
| 160975_at   | A1504338 | ---               | Transcribed locus                                             |   | X | X | X | X | X |   |
| 97305_at    | AW123267 | Nip7              | nuclear import 7 homolog (S. cerevisiae)                      |   |   | X | X | X | X | X |
| 101510_at   | AB007136 | Psme1             | proteasome (prosome, macropain) 28 subunit, alpha             | X |   |   |   | X | X |   |
| 161327_f_at | AV104703 | Rpl10a /// LOC54  | ribosomal protein L10A /// similar to ribosomal protein L10;  |   | X |   |   | X |   |   |
| 160230_at   | A1852363 | Cox17             | cytochrome c oxidase, subunit XVII assembly protein hom       |   | X |   |   | X | X |   |
| 93089_at    | X12507   | Eif4a2            | eukaryotic translation initiation factor 4A2                  | X |   |   | X | X | X | X |
| 96883_at    | U70733   | Eif3s4            | eukaryotic translation initiation factor 3, subunit 4 (delta) |   |   | X |   | X | X | X |
| 103312_f_at | AW047929 | Z610101J03Rik     | RIKEN cDNA Z610101J03 gene                                    | X | X | X | X | X | X |   |
| 95657_f_at  | AW125164 | D13Wsu177e        | DNA segment, Chr 13, Wayne State University 177, expe         | X |   |   |   | X |   |   |
| 93323_at    | AB031292 | Plp2              | proteolipid protein 2                                         |   |   |   |   | X | X |   |
| 95653_at    | A1841323 | Mrpl37            | mitochondrial ribosomal protein L37                           |   |   | X | X | X | X |   |
| 104069_at   | A1852737 | Spats2            | spermatogenesis associated, serine-rich 2                     |   |   | X | X | X | X |   |
| 99778_at    | AU020239 | Snora65 /// Rpl12 | small nucleolar RNA, H/ACA box 65 /// ribosomal protein L     |   |   |   |   | X |   |   |
| 161068_at   | AW123574 | Fmr1nb            | fragile X mental retardation 1 neighbor                       |   |   | X |   | X |   |   |
| 98111_at    | L40406   | Hsp110            | heat shock protein 110                                        |   |   | X |   | X | X |   |
| 103099_f_at | A1663971 | Cxxc1             | CXXC finger 1 (PHD domain)                                    |   |   |   |   | X |   |   |
| 92366_at    | U12147   | Lama2             | laminin, alpha 2                                              |   |   | X |   | X |   |   |
| 103861_s_at | AA388099 | D7Wsu128e         | DNA segment, Chr 7, Wayne State University 128, expres        |   |   | X | X | X | X |   |
| 94967_at    | A1851365 | D19Wsu12e         | DNA segment, Chr 19, Wayne State University 12, expres        |   |   | X |   | X | X |   |
| 160293_at   | A1839817 | Wdr61             | WD repeat domain 61                                           |   |   | X | X | X | X |   |
| 96652_at    | A1849911 | Mrpl28            | mitochondrial ribosomal protein L28                           | X |   |   |   | X | X |   |
| 98463_at    | AW124186 | Smarca4           | SWI/SNF related, matrix associated, actin dependent regu      |   |   | X |   | X | X |   |
| 95049_at    | A1837853 | Snrpd2            | small nuclear ribonucleoprotein D2                            |   |   |   |   | X | X | X |
| 161400_f_at | AV276050 | Rpn1              | ribophorin I                                                  |   |   |   |   | X |   |   |
| 96653_at    | A1851762 | Rnaset2           | ribonuclease T2                                               |   |   |   |   | X | X | X |
| 93328_at    | X57437   | Hdc               | histidine decarboxylase                                       |   |   |   |   | X |   |   |
| 96307_s_at  | AW121947 | Z1100001122Rik    | RIKEN cDNA Z1100001122 gene                                   |   |   |   |   | X | X |   |
| 96858_at    | AF100927 | Pdcd8             | programmed cell death 8                                       |   |   | X | X | X | X |   |
| 103784_at   | A1550305 | Gemin5            | gem (nuclear organelle) associated protein 5                  | X |   |   |   | X |   |   |
| 160614_at   | U92437   | Pten              | phosphatase and tensin homolog                                |   |   |   |   | X | X |   |
| 97758_at    | AB023564 | Prdx1             | peroxiredoxin 1                                               |   |   | X | X | X | X |   |
| 96710_at    | A1854262 | H2afv             | H2A histone family, member V                                  | X | X |   |   | X | X |   |
| 97512_at    | AW226650 | Z2010107E04Rik    | RIKEN cDNA Z2010107E04 gene                                   |   |   | X | X | X | X |   |
| 98600_at    | U41341   | S100a11           | S100 calcium binding protein A11 (calizzarin)                 |   |   |   |   | X | X |   |
| 97385_at    | AJ242909 | Nagk              | N-acetylglucosamine kinase                                    |   |   |   |   |   | X |   |
| 100727_at   | X74856   | Rpl28             | ribosomal protein L28                                         |   |   |   |   | X | X |   |
| 101011_at   | L25913   | Cct4              | chaperonin subunit 4 (delta)                                  |   |   | X | X | X | X |   |
| 101212_at   | AF043285 | Rps7              | ribosomal protein S7                                          |   |   |   |   | X | X | X |
| 103726_at   | A1842264 | Yip5              | Yip1 domain family, member 5                                  |   |   | X |   | X |   |   |
| 104279_at   | AW125116 | Polr2f            | polymerase (RNA) II (DNA directed) polypeptide F              |   |   | X | X | X | X |   |
| 101059_at   | D76440   | Ndn               | neudin                                                        |   | X | X | X | X | X |   |
| 93822_at    | X73331   | Rpl37a            | ribosomal protein L37a                                        |   |   | X |   | X | X |   |
| 99994_at    | AF041376 | Cidea             | cell death-inducing DNA fragmentation factor, alpha subur     |   |   | X | X | X |   |   |
| 104573_at   | AA921069 | Bola2             | bolA-like 2 (E. coli)                                         | X | X |   |   | X | X |   |
| 160256_at   | AA611709 | Tom7              | translocase of outer mitochondrial membrane 7 homolog (       |   | X |   |   | X | X |   |
| 160335_at   | U95053   | Gclm              | glutamate-cysteine ligase, modifier subunit                   |   | X | X | X | X |   |   |
